# Supplementary material for: Cell circuits between leukemic cells and mesenchymal stem cells block lymphopoiesis by activating lymphotoxin beta receptor signaling
Source: eLife. 2023 Mar 13;12:e83533. doi: 10.7554/eLife.83533 (PMC10042536; doi:10.7554/eLife.83533)
Supplement: Supplementary file 1. — Differentially expressed genes analyzed by bulk RNA-sequencing of Lepr+ MSPCs isolated from resting wild-type (WT) mice or Hel-Ig treated WT mice transplanted with ALL cells for 2 weeks. Related to Figure 3. [file elife-83533-supp1.xlsx]

## Sheet: Sheet1
gene_id	mgi_symbol	baseMean	log2FoldChange	lfcSE	stat	pvalue	padj	CTR1	CTR2	CTR3	Hel-Ig 1	Hel-Ig 2	Hel-Ig 3	Hel-Ig 4
ENSMUSG00000029417.9	Cxcl9	25264.8	4.15111	0.153595	27.0263	7.26e-161	1.13e-156	2249.84	2424.49	2307.61	43782.5	44426	45375.4	31762.8
ENSMUSG00000104713.4	Gbp6	3131.26	2.78111	0.15024	18.5111	1.68e-76	1.3e-72	643.541	703.727	754.464	5590.07	4476.25	4924.32	4272.72
ENSMUSG00000071005.7	Ccl19	2914.12	3.4881	0.205178	17.0004	8.16e-65	4.22e-61	405.91	416.452	423.328	4031.51	4702.06	6126.65	3769.5
ENSMUSG00000046031.7	Calhm6	989.233	4.2121	0.256044	16.4507	8.29e-61	3.22e-57	67.3117	85.7969	109.124	1596.11	1662.1	1942.62	1284.4
ENSMUSG00000054072.11	Iigp1	52443.7	2.2997	0.146511	15.6965	1.6e-55	4.96e-52	16166	15142.7	15999	94494.8	74038.3	77778.8	64210.6
ENSMUSG00000105096.1	Gbp10	505.784	3.95706	0.254998	15.518	2.62e-54	6.79e-51	58.1328	53.0205	47.9771	995.223	738.515	725.916	832.844
ENSMUSG00000091938.2	Gm2564	586.652	3.25095	0.218736	14.8624	5.78e-50	1.28e-46	99.9477	97.365	95.0135	802.547	979.374	859.394	1068.44
ENSMUSG00000078921.3	Tgtp2	10360.3	2.43775	0.17095	14.26	3.88e-46	7.54e-43	2897.46	2192.16	3509.86	15489.2	14432	16423	15746.5
ENSMUSG00000078922.9	Tgtp1	2922.87	2.58406	0.18184	14.2106	7.87e-46	1.36e-42	801.621	572.622	843.833	4322.98	4053.86	4272.33	5077.66
ENSMUSG00000046879.7	Irgm1	7030.62	1.93488	0.14201	13.6249	2.85e-42	4.42e-39	2966.82	2170.95	2731.87	10313.1	9358.95	10754.2	9674.84
ENSMUSG00000018830.8	Myh11	545.141	2.67574	0.199737	13.3963	6.35e-41	8.97e-38	139.723	117.609	133.583	849.083	858.059	878.903	741.913
ENSMUSG00000094162.1	Ccl19-ps3	489.745	3.27764	0.250327	13.0934	3.59e-39	4.65e-36	85.6695	77.1208	77.1397	631.097	831.494	722.836	915.508
ENSMUSG00000028270.12	Gbp2	12667.7	3.05939	0.239689	12.764	2.61e-37	3.11e-34	1634.86	2293.38	3206.94	21062.2	21018.5	21972.6	15220.6
ENSMUSG00000078853.8	Igtp	8830.85	2.25356	0.176931	12.7369	3.69e-37	4.09e-34	2288.6	2638.49	3262.45	14514.4	13116.2	13931	10494.2
ENSMUSG00000079362.5	Gm43302	639.82	3.10226	0.251427	12.3386	5.61e-35	5.81e-32	155.021	96.401	99.7172	1087.48	1052.87	947.695	925.841
ENSMUSG00000015340.10	Cybb	6610.22	2.35372	0.200521	11.738	8.13e-32	7.9e-29	2470.14	1419.02	1885.22	10903.4	9741.49	9986.22	8695.26
ENSMUSG00000026104.14	Stat1	10915.1	1.65838	0.144703	11.4606	2.08e-30	1.9e-27	4656.75	4861.5	4779.84	15972.6	16584.7	15669.3	11929.5
ENSMUSG00000070427.4	Il18bp	1601.67	1.73107	0.166007	10.4277	1.85e-25	1.6e-22	689.435	668.059	656.628	2001.06	2602.51	2333.82	1972.58
ENSMUSG00000028268.14	Gbp3	4505.12	1.70333	0.16425	10.3703	3.38e-25	2.77e-22	1950	2118.89	1684.84	7073.52	6914.94	5393.55	5597.41
ENSMUSG00000082902.3	Ccl19-ps1	240.387	3.37352	0.351524	9.59685	8.24e-22	6.4e-19	29.5764	40.4884	40.4513	282.483	363.059	429.184	454.654
ENSMUSG00000024164.15	C3	12306.6	1.01599	0.107723	9.43157	4.04e-21	2.99e-18	6925.97	7976.22	7812.75	15668.9	14193	14791.4	16602.1
ENSMUSG00000022425.15	Enpp2	8437.09	1.81189	0.19394	9.34251	9.41e-21	6.64e-18	3824.53	2694.41	3618.04	13640.9	10888.2	13523.4	9378.28
ENSMUSG00000025491.14	Ifitm1	1808.57	2.76361	0.307279	8.9938	2.39e-19	1.61e-16	512.997	343.188	371.587	2023.92	2679.55	4248.71	2154.44
ENSMUSG00000030218.2	Mgp	8504.54	0.91506	0.103666	8.82701	1.08e-18	6.96e-16	6061.11	5174.81	5279.36	10561.3	10797	10281.9	9866
ENSMUSG00000001493.9	Meox1	1335.02	2.65665	0.306236	8.67516	4.13e-18	2.56e-15	201.935	393.316	372.528	2472.95	2190.75	2076.1	1399.1
ENSMUSG00000046688.14	Tifa	6631.38	2.08693	0.240681	8.67094	4.29e-18	2.56e-15	2898.48	1503.86	2391.33	10771.9	9253.58	10837.4	7588.59
ENSMUSG00000032000.17	Birc3	2188.68	1.40136	0.165564	8.46419	2.58e-17	1.48e-14	944.404	1070.05	1287.86	3015.06	2534.33	3101.83	2981.09
ENSMUSG00000075602.10	Ly6a	736.463	2.81623	0.33349	8.44472	3.05e-17	1.69e-14	186.637	186.054	111.006	1310.36	1484.11	983.632	760.513
ENSMUSG00000074896.3	Ifit3	3481.32	1.58638	0.190606	8.32287	8.59e-17	4.6e-14	1846.99	1350.58	1551.26	5108.38	5646.9	3873.95	4370.88
ENSMUSG00000012519.14	Mlkl	1067.45	1.82582	0.221245	8.25246	1.55e-16	8.03e-14	456.904	481.041	333.958	1721.84	1645.28	1355.32	1287.5
ENSMUSG00000050578.10	Mmp13	88259.3	1.98492	0.241864	8.20677	2.27e-16	1.14e-13	25564.2	32678	37685.6	108610	185595	109010	102616
ENSMUSG00000024338.14	Psmb8	8699.18	1.05984	0.13217	8.0188	1.07e-15	5.18e-13	4795.45	5287.59	5621.79	11544.3	11917.2	10854.9	9322.48
ENSMUSG00000105504.4	Gbp5	1023.25	1.80398	0.225655	7.99443	1.3e-15	6.13e-13	365.115	355.72	513.638	1215.66	1477.03	1689.01	1363.96
ENSMUSG00000026678.10	Rgs5	1865.13	2.80622	0.352693	7.95657	1.77e-15	8.08e-13	407.95	470.437	353.714	1568.35	3815.66	4044.39	2052.14
ENSMUSG00000069763.3	Tmem100	2222.57	2.15964	0.272753	7.91795	2.41e-15	1.07e-12	858.734	778.92	541.859	2464.79	3571.26	4369.87	2570.86
ENSMUSG00000024529.13	Lox	8428.11	-1.02806	0.130013	-7.90735	2.63e-15	1.13e-12	12204.8	11707.9	10859.8	5943.58	5900.15	4751.82	6136.8
ENSMUSG00000078920.3	Ifi47	7408.21	1.73251	0.219569	7.89049	3.01e-15	1.26e-12	2878.09	2361.82	4072.41	11896.1	11535.5	9097.05	8701.46
ENSMUSG00000034614.14	Pik3ip1	1260.77	2.35891	0.302674	7.79356	6.51e-15	2.66e-12	324.32	443.445	329.255	2311.3	2472.34	1434.38	1283.37
ENSMUSG00000020044.13	Timp3	11311.7	2.00995	0.258017	7.79002	6.7e-15	2.67e-12	3324.79	4266.71	4523.96	17274.8	23497.9	11962.7	12283.9
ENSMUSG00000031963.8	Bmper	1950.42	-1.96981	0.254814	-7.73038	1.07e-14	4.16e-12	2607.82	3385.6	3936.01	1160.96	660.59	713.595	845.244
ENSMUSG00000085977.1	Gm5970	572.46	2.2578	0.294617	7.66351	1.81e-14	6.85e-12	186.637	180.27	162.746	896.436	1096.26	825.511	555.918
ENSMUSG00000030560.17	Ctsc	2830.28	2.00306	0.265641	7.54047	4.68e-14	1.69e-11	1110.64	1081.62	851.359	3709.84	5585.8	4320.59	2636.99
ENSMUSG00000036381.13	P2ry14	2186.22	1.1917	0.158016	7.54167	4.64e-14	1.69e-11	1450.26	1059.45	1178.73	2676.24	2896.5	2981.7	2672.13
ENSMUSG00000069874.7	Irgm2	7764.75	1.48125	0.197261	7.50907	5.95e-14	2.1e-11	2921.94	3389.46	4909.66	11228.3	10567.7	10826.1	9132.35
ENSMUSG00000015568.16	Lpl	33793.6	-1.22923	0.163914	-7.49923	6.42e-14	2.19e-11	56948.8	43895.2	46170	19144.4	21438.2	17748.5	25257.1
ENSMUSG00000073409.12	H2-Q6	3742.4	1.05418	0.140596	7.49798	6.48e-14	2.19e-11	1982.64	2260.6	2532.44	5047.15	4669.29	4171.71	4871
ENSMUSG00000025887.10	Casp12	2093.62	1.45669	0.199124	7.31546	2.56e-13	8.48e-11	1047.41	1232.01	785.508	3095.89	2946.98	2685.99	2488.2
ENSMUSG00000041119.11	Pde9a	696.088	3.11951	0.427016	7.30537	2.77e-13	8.95e-11	85.6695	114.717	176.857	676.001	1779.87	1153.05	757.413
ENSMUSG00000031538.6	Plat	387.272	2.67424	0.366259	7.3015	2.85e-13	9.02e-11	107.087	67.4807	103.48	546.189	787.218	655.07	374.057
ENSMUSG00000031304.18	Il2rg	1291.87	2.95566	0.410237	7.20475	5.81e-13	1.81e-10	196.836	454.049	125.117	1920.23	2442.24	2060.7	1609.89
ENSMUSG00000016496.7	Cd274	481.131	2.84953	0.399179	7.13848	9.44e-13	2.87e-10	137.683	107.969	63.9695	1005.84	843.891	448.692	674.748
ENSMUSG00000082292.3	Gm12250	1812.89	2.00808	0.283336	7.08728	1.37e-12	4.08e-10	562.971	435.732	946.372	2755.44	2956.72	2548.41	2161.67
ENSMUSG00000040026.8	Saa3	825.932	2.66237	0.376098	7.07894	1.45e-12	4.26e-10	116.266	251.607	228.597	822.141	1768.36	1391.25	1051.9
ENSMUSG00000006818.4	Sod2	3752.63	1.48275	0.20983	7.06641	1.59e-12	4.57e-10	1445.16	1848.97	2123.22	5404.74	5455.62	5588.63	3731.27
ENSMUSG00000050350.7	Gpr18	772.141	2.39403	0.340834	7.02403	2.16e-12	6.09e-10	301.883	223.65	132.643	1307.91	1438.07	907.652	954.774
ENSMUSG00000031451.6	Gas6	40223.7	-1.36356	0.194981	-6.99329	2.69e-12	7.45e-10	58398	60603.4	61783.2	25253.7	25714.3	15624.1	27077.8
ENSMUSG00000027514.14	Zbp1	1524.54	1.50745	0.216419	6.96541	3.27e-12	8.92e-10	758.787	639.139	774.219	2428.87	2292.58	1994.99	1511.72
ENSMUSG00000107705.1	Gm45062	336.09	25.514	3.67822	6.93651	4.02e-12	1.08e-09	0	0	0	0	1284.87	1001.09	0
ENSMUSG00000033355.6	Rtp4	7888.83	1.04562	0.151067	6.92156	4.47e-12	1.18e-09	4454.81	4249.35	5644.37	9936.72	11205.2	9153.52	9173.68
ENSMUSG00000040253.15	Gbp7	9086.02	1.8917	0.274896	6.88152	5.92e-12	1.53e-09	2419.14	2852.51	5156.13	15655	11487.7	14122	10308.2
ENSMUSG00000031504.6	Rab20	680.615	1.796	0.26363	6.81256	9.59e-12	2.44e-09	324.32	251.607	249.293	1168.31	784.562	1103.76	762.579
ENSMUSG00000033066.15	Gas7	824.509	2.58026	0.379785	6.79401	1.09e-11	2.73e-09	90.7688	284.383	251.174	1392.01	1317.64	1148.94	1139.74
ENSMUSG00000075010.4	AW112010	3881.23	1.29947	0.192211	6.76068	1.37e-11	3.39e-09	2554.79	1662.92	1969.88	5807.24	5268.78	4287.73	4931.97
ENSMUSG00000043289.12	Mei4	71.8675	9.41715	1.39693	6.74132	1.57e-11	3.81e-09	0	0	0	82.459	68.1842	183.789	156.029
ENSMUSG00000002289.15	Angptl4	3159.71	-1.44286	0.214909	-6.71384	1.9e-11	4.53e-09	5448.17	5236.5	3777.96	1467.93	2216.43	1555.53	1850.65
ENSMUSG00000107061.1	Gm19590	50.2374	-9.3745	1.39817	-6.70484	2.02e-11	4.74e-09	66.2918	114.717	161.805	0	0	0	0
ENSMUSG00000018899.16	Irf1	5372.32	1.56221	0.233644	6.68626	2.29e-11	5.23e-09	1977.54	3072.3	2371.58	9822.42	7243.47	6283.74	5883.64
ENSMUSG00000034648.9	Lrrn1	798.234	-2.38792	0.357082	-6.68731	2.27e-11	5.23e-09	1155.52	1314.91	1871.11	261.256	247.943	168.388	428.822
ENSMUSG00000067212.8	H2-T23	8198.52	1.27739	0.193186	6.61222	3.79e-11	8.52e-09	3894.9	4556.87	4766.67	13577.2	11509.9	8686.35	8944.29
ENSMUSG00000034842.16	Art3	265.956	3.70443	0.562606	6.58441	4.57e-11	1.01e-08	48.954	40.4884	9.40728	570.682	488.801	358.338	297.592
ENSMUSG00000084754.1	Gm12532	59.3242	9.14166	1.38925	6.58029	4.7e-11	1.03e-08	0	0	0	88.9904	156.735	67.7659	90.9309
ENSMUSG00000022878.5	Adipoq	21432.4	-1.32195	0.201497	-6.56066	5.36e-11	1.16e-08	37247.9	25091.2	33071.3	12875	10202.8	11532.5	16269.4
ENSMUSG00000026580.16	Selp	90.5604	9.75213	1.5001	6.50097	7.98e-11	1.7e-08	0	0	0	191.86	303.73	79.0602	42.3655
ENSMUSG00000045868.12	Gvin1	936.676	1.25662	0.194099	6.4741	9.54e-11	2e-08	470.162	611.182	444.964	1262.19	1131.68	1140.72	1329.86
ENSMUSG00000061353.11	Cxcl12	512164	-0.663895	0.10303	-6.44367	1.17e-10	2.41e-08	622913	621020	653812	425226	426842	352934	391703
ENSMUSG00000020123.6	Avpr1a	833.929	1.77861	0.276483	6.43297	1.25e-10	2.56e-08	459.963	229.434	332.077	998.489	1222	1224.92	1222.4
ENSMUSG00000022587.14	Ly6e	9411.45	1.20456	0.187411	6.42736	1.3e-10	2.62e-08	4294.69	6699.87	4764.79	12554.2	13496.9	10470.9	11916.1
ENSMUSG00000029561.17	Oasl2	4852.11	1.42597	0.222411	6.41139	1.44e-10	2.87e-08	2086.66	2979.75	2155.21	5861.94	8656.74	5795.01	5550.91
ENSMUSG00000016918.15	Sulf1	6485.71	1.26184	0.197371	6.39324	1.62e-10	3.19e-08	4197.8	3871.46	2472.23	9094.99	8581.47	8112.39	7916.15
ENSMUSG00000064373.11	Selenop	28548.3	-0.892114	0.140345	-6.35656	2.06e-10	4.01e-08	37328.4	34853.8	41192.6	22616.6	21755.2	16622.1	20433.6
ENSMUSG00000037405.8	Icam1	2739.16	1.46654	0.233163	6.28974	3.18e-10	6.1e-08	1327.88	1632.07	1028.22	3865.78	4581.63	2854.38	3392.34
ENSMUSG00000059921.15	Unc5c	264.286	2.41663	0.384364	6.28735	3.23e-10	6.12e-08	78.5303	101.221	42.3328	433.522	403.792	417.889	325.491
ENSMUSG00000032508.8	Myd88	2657.78	1.06211	0.169362	6.27127	3.58e-10	6.7e-08	1589.98	1652.31	1550.32	3356.33	4022.87	3234.28	2721.73
ENSMUSG00000021759.14	Plpp1	2399.75	1.04144	0.166239	6.26472	3.73e-10	6.91e-08	1667.49	1223.33	1483.53	2675.43	3207.32	3264.06	2849.86
ENSMUSG00000078606.8	Gvin2	1115.09	1.13773	0.18171	6.26122	3.82e-10	6.98e-08	588.468	769.28	575.726	1488.35	1321.18	1348.13	1516.89
ENSMUSG00000055447.18	Cd47	13244.9	0.773369	0.123877	6.24305	4.29e-10	7.75e-08	10126.3	9162.91	8271.82	14828.8	14751.7	17642.7	15579.1
ENSMUSG00000038521.17	C1s1	17207.5	0.740174	0.11923	6.20795	5.37e-10	9.58e-08	11546	11811	13028.1	23411	18872	19095.6	19653.5
ENSMUSG00000024610.14	Cd74	518.762	1.92184	0.310298	6.19354	5.88e-10	1.04e-07	203.975	226.542	154.279	583.745	1038.7	668.418	661.315
ENSMUSG00000030096.8	Slc6a6	18498.7	-1.23318	0.201685	-6.1144	9.69e-10	1.69e-07	34493.2	21785.7	24287.7	10353.9	10823.6	10220.3	14283.4
ENSMUSG00000027215.13	Cd82	1404.9	1.65021	0.270064	6.11046	9.93e-10	1.71e-07	764.906	508.033	576.666	1687.55	2652.1	1456.97	1935.38
ENSMUSG00000020644.9	Id2	1287.74	1.19122	0.196211	6.07113	1.27e-09	2.17e-07	824.059	693.123	655.687	1712.05	1671.84	1316.3	1913.68
ENSMUSG00000020963.15	Tshr	42.4777	-9.13231	1.51869	-6.01327	1.82e-09	3.04e-07	103.007	37.5964	149.576	0	0	0	0
ENSMUSG00000095298.2	Gm12407	401.113	2.40076	0.399257	6.01306	1.82e-09	3.04e-07	62.2124	98.329	179.679	510.266	697.782	588.331	599.317
ENSMUSG00000001870.15	Ltbp1	17727.6	0.982432	0.16417	5.98422	2.17e-09	3.59e-07	9270.66	11032.1	12981.1	26014.6	20143.6	22019.8	19501.6
ENSMUSG00000017493.12	Igfbp4	21491.4	-0.74974	0.125354	-5.98096	2.22e-09	3.63e-07	26140.4	28909.7	26730.8	16141.6	17998	13754.4	16944.1
ENSMUSG00000041515.9	Irf8	944.371	2.4455	0.409454	5.97258	2.34e-09	3.78e-07	301.883	372.108	105.362	1374.05	1686.01	1520.62	1079.8
ENSMUSG00000087594.1	NA	395.36	-1.3469	0.225902	-5.96233	2.49e-09	3.98e-07	694.535	565.874	509.875	241.662	235.546	224.859	225.261
ENSMUSG00000029798.11	Herc6	1812.33	1.28903	0.21748	5.92714	3.08e-09	4.88e-07	845.476	1052.7	1005.64	3140.79	1952.55	2284.53	2086.24
ENSMUSG00000031639.12	Tlr3	1251.53	1.19604	0.201969	5.92187	3.18e-09	4.99e-07	852.615	669.023	585.133	1832.06	1673.61	1446.7	1479.69
ENSMUSG00000048776.8	Pthlh	36.5987	8.44397	1.44343	5.84994	4.92e-09	7.64e-07	0	0	0	62.0484	42.5045	69.8194	75.4313
ENSMUSG00000005360.14	Slc1a3	1775.73	-1.25229	0.216516	-5.78384	7.3e-09	1.12e-06	2496.65	2573.91	2698.01	1289.14	784.562	987.739	1288.53
ENSMUSG00000019278.5	Dpep1	23743.5	-0.983466	0.170385	-5.77203	7.83e-09	1.19e-06	31407	31521.2	33837	17177.6	17147	11922.7	19000.4
ENSMUSG00000019846.11	Lama4	3824.99	0.943024	0.163955	5.75173	8.83e-09	1.33e-06	2687.37	2502.57	2134.51	5701.92	4246.9	4462.28	4364.68
ENSMUSG00000010067.13	Rassf1	2138.66	1.02641	0.180969	5.67178	1.41e-08	2.11e-06	1392.13	1479.76	1054.56	2797.89	2738	2850.27	2276.37
ENSMUSG00000030103.11	Bhlhe40	1370.79	1.28038	0.226737	5.647	1.63e-08	2.41e-06	746.548	776.028	683.909	1414.05	2384.68	1623.3	1719.42
ENSMUSG00000072763.2	5430403G16Rik	36.777	8.45211	1.49785	5.64284	1.67e-08	2.45e-06	0	0	0	101.237	40.7334	67.7659	41.3322
ENSMUSG00000029298.15	Gbp9	295.92	4.70267	0.837493	5.61518	1.96e-08	2.85e-06	29.5764	26.9923	0	447.401	677.415	456.906	379.223
ENSMUSG00000035385.5	Ccl2	7409.14	1.51104	0.26964	5.60391	2.1e-08	3.01e-06	2105.02	3738.43	4687.65	11160.5	9393.49	11542.8	7920.28
ENSMUSG00000068606.5	Gm4841	342.061	2.77181	0.496363	5.58425	2.35e-08	3.34e-06	143.802	42.4164	45.1549	598.44	587.978	408.649	507.353
ENSMUSG00000064080.12	Fbln2	30.2637	8.17046	1.46892	5.56222	2.66e-08	3.76e-06	0	0	0	53.0677	57.5581	42.097	53.7319
ENSMUSG00000037321.17	Tap1	4547.46	1.39675	0.253004	5.52066	3.38e-08	4.73e-06	1873.51	2491	2513.62	7065.35	8000.58	4559.82	4511.41
ENSMUSG00000027188.8	Pamr1	308.965	3.86936	0.702928	5.50463	3.7e-08	5.13e-06	12.2385	14.4602	76.199	724.17	666.789	368.605	244.893
ENSMUSG00000005672.12	Kit	1627.17	-2.31356	0.422022	-5.48208	4.2e-08	5.78e-06	1736.85	2996.14	4022.55	1054.82	401.136	365.525	528.019
ENSMUSG00000025938.16	Slco5a1	38.9462	8.53517	1.56626	5.4494	5.05e-08	6.88e-06	0	0	0	120.015	65.5277	58.5251	21.6994
ENSMUSG00000049872.8	Calhm5	2141.16	1.4033	0.257797	5.44344	5.23e-08	7.06e-06	1111.66	880.141	1237.06	3389.8	3616.42	2320.47	2050.08
ENSMUSG00000018920.11	Cxcl16	663.997	1.37973	0.253997	5.43209	5.57e-08	7.46e-06	341.658	428.02	243.649	889.904	951.037	800.869	874.176
ENSMUSG00000020467.15	Efemp1	2342.05	-1.2245	0.22591	-5.42028	5.95e-08	7.9e-06	3507.35	2873.71	3796.78	1664.69	1131.68	1191.04	1820.68
ENSMUSG00000074071.11	Fam169b	32.0497	8.25336	1.52457	5.41357	6.18e-08	8.13e-06	0	0	0	66.1305	55.7871	70.8461	25.8326
ENSMUSG00000050075.8	Gpr171	1060.82	1.80193	0.333894	5.39671	6.79e-08	8.86e-06	483.421	274.743	523.986	1442.62	1421.24	2097.66	993.006
ENSMUSG00000076431.4	Sox4	3287.43	0.963754	0.178931	5.38619	7.2e-08	9.31e-06	2395.68	2194.09	1639.69	4096.01	3712.94	4622.45	3767.43
ENSMUSG00000021835.14	Bmp4	5013.01	-1.38635	0.258764	-5.35757	8.44e-08	1.08e-05	9765.3	6590.94	6301	3625.75	3139.13	1865.62	2922.19
ENSMUSG00000074971.4	Fibin	2775.21	1.22674	0.229396	5.34772	8.91e-08	1.13e-05	1106.56	1418.06	2071.48	3669.02	3461.46	3958.14	3249.74
ENSMUSG00000068245.14	Phf11d	1867.55	1.27206	0.23829	5.33829	9.38e-08	1.18e-05	787.343	1099.93	1131.7	2033.72	3132.93	1996.01	2555.36
ENSMUSG00000031465.6	Angpt2	4463.79	1.19461	0.225512	5.29731	1.18e-07	1.47e-05	3520.61	2001.28	1998.11	5972.97	5258.16	5752.91	5955.97
ENSMUSG00000022018.7	Rgcc	6221.9	-1.36868	0.260235	-5.25939	1.45e-07	1.8e-05	9576.62	5632.71	12809.9	3623.3	3344.57	3293.83	4195.22
ENSMUSG00000020077.14	Srgn	548.628	2.49861	0.475423	5.25555	1.48e-07	1.82e-05	50.9937	181.234	206.019	1044.21	577.352	923.053	761.546
ENSMUSG00000026640.12	Plxna2	3796.33	-1.37105	0.261877	-5.23548	1.65e-07	2.01e-05	6056.02	3743.25	7304.75	2662.36	1671.84	2026.82	2453.07
ENSMUSG00000003227.4	Edar	971.234	-1.28616	0.245864	-5.23117	1.68e-07	2.04e-05	1522.67	1469.15	1292.56	538.025	672.987	413.782	717.114
ENSMUSG00000020592.14	Sdc1	7158.92	-0.986318	0.188893	-5.22156	1.77e-07	2.13e-05	10134.5	8757.06	10312.3	5603.95	5477.76	3503.29	5062.16
ENSMUSG00000023961.16	Enpp4	6374.96	1.01016	0.193496	5.22056	1.78e-07	2.13e-05	5186.06	3563.94	3054.54	8165.08	7580.85	7673.97	8273.67
ENSMUSG00000028850.2	Gpatch3	41.0299	6.15576	1.18328	5.20229	1.97e-07	2.33e-05	0	2.89203	0	91.4397	54.9016	68.7926	61.9983
ENSMUSG00000030208.15	Emp1	7487.27	-1.00893	0.193992	-5.2009	1.98e-07	2.33e-05	9908.08	9337.4	11488.2	3732.7	6008.18	4821.64	5787.54
ENSMUSG00000030030.5	1700003E16Rik	25.4803	7.92248	1.52556	5.19317	2.07e-07	2.41e-05	0	0	0	54.7005	39.8479	33.8829	45.4654
ENSMUSG00000054203.7	Ifi205	406.816	2.13918	0.41227	5.18878	2.12e-07	2.45e-05	162.16	84.8329	157.102	320.855	773.05	670.471	605.517
ENSMUSG00000079012.11	Serpina3m	1383.89	1.55211	0.29918	5.1879	2.13e-07	2.45e-05	512.997	468.509	942.609	2402.74	1568.24	1794.77	1755.59
ENSMUSG00000004044.9	Cavin1	3923.45	-0.634487	0.122398	-5.18382	2.17e-07	2.48e-05	5236.04	4790.16	4376.27	3207.74	3301.18	2983.75	2872.59
ENSMUSG00000026536.9	Ifi211	1516.83	1.23063	0.238637	5.15689	2.51e-07	2.85e-05	1036.19	807.84	663.213	2170.88	2257.16	1469.29	1943.65
ENSMUSG00000032372.14	Plscr2	1161.02	1.2609	0.244569	5.15558	2.53e-07	2.85e-05	699.634	537.918	650.984	1131.57	1299.93	1863.56	1738.02
ENSMUSG00000021508.11	Cxcl14	38329.3	-0.783304	0.152244	-5.14506	2.67e-07	2.97e-05	43989.2	45699.8	57702.4	32052.9	30893.7	26052.9	25141.3
ENSMUSG00000047921.15	Trappc9	203.374	-1.61569	0.314127	-5.14344	2.7e-07	2.97e-05	319.221	317.159	330.195	96.3383	79.6959	116.023	129.163
ENSMUSG00000058571.10	Gpc6	6535.72	-0.654793	0.127255	-5.14551	2.67e-07	2.97e-05	8734.21	7571.33	7842.85	5312.48	4359.36	5461.31	5317.39
ENSMUSG00000030107.10	Usp18	2463.23	0.913476	0.177942	5.13357	2.84e-07	3.11e-05	1726.65	1563.62	1496.7	2753.8	3780.24	2754.78	2724.83
ENSMUSG00000032625.14	Thsd7a	2390.73	-1.12538	0.219873	-5.11829	3.08e-07	3.33e-05	2855.65	2914.2	4357.45	1579.78	1272.48	1482.63	1854.78
ENSMUSG00000046718.8	Bst2	3666.39	0.978541	0.191144	5.11939	3.07e-07	3.33e-05	2138.68	2466.9	2290.67	4486.26	5656.64	4509.51	3456.41
ENSMUSG00000022324.14	Matn2	2415.23	-0.96119	0.188974	-5.08637	3.65e-07	3.91e-05	3031.07	3262.21	3489.16	2169.24	1553.18	1422.06	1554.09
ENSMUSG00000028370.7	Pappa	10388.7	-1.06545	0.211015	-5.04915	4.44e-07	4.65e-05	15369.5	12927.4	15011.2	8209.98	5515.84	5248.77	8622.93
ENSMUSG00000029130.12	Rnf32	29.72	8.14408	1.61328	5.04814	4.46e-07	4.65e-05	0	0	0	58.7827	38.0769	87.2742	18.5995
ENSMUSG00000030268.17	Bcat1	986.074	-2.02454	0.400778	-5.05152	4.38e-07	4.65e-05	1224.87	1100.9	2745.04	255.541	427.701	561.635	415.389
ENSMUSG00000059602.14	Syn3	1012.76	1.26378	0.250316	5.04875	4.45e-07	4.65e-05	580.309	495.501	569.14	1068.7	1597.46	1004.17	1593.36
ENSMUSG00000097461.1	NA	2615.78	0.91497	0.181551	5.03974	4.66e-07	4.83e-05	1979.58	1712.08	1387.57	3244.48	3068.29	3676.81	2776.49
ENSMUSG00000025930.6	Msc	1243.08	1.06929	0.212737	5.02637	5e-07	5.14e-05	916.867	628.534	688.613	1308.73	1678.93	1759.86	1498.29
ENSMUSG00000025289.15	Prdx4	4234.75	-0.742706	0.147857	-5.02313	5.08e-07	5.17e-05	6183.5	4612.79	5288.77	2896.68	3479.17	3139.82	3294.18
ENSMUSG00000038530.11	Rgs4	943.186	2.25215	0.448392	5.02272	5.09e-07	5.17e-05	496.679	267.031	111.947	1442.62	1047.56	1711.6	1358.8
ENSMUSG00000089797.1	Gm16118	680.882	1.4419	0.2872	5.02055	5.15e-07	5.2e-05	300.863	233.29	471.305	906.233	819.982	984.659	929.975
ENSMUSG00000021186.9	Fbln5	36413.8	-0.717759	0.14347	-5.00287	5.65e-07	5.66e-05	41277.4	44300.1	51651.6	26460.4	27053.2	24709.9	33019.3
ENSMUSG00000022912.8	Pros1	17938.3	0.434382	0.0872481	4.9787	6.4e-07	6.37e-05	15526.6	13391.1	14775.1	19585.2	19337.8	19902.6	19875.6
ENSMUSG00000022367.7	Has2	45.1325	6.88346	1.3921	4.94468	7.63e-07	7.54e-05	0	1.92802	0	103.686	32.7639	126.291	43.3988
ENSMUSG00000085594.1	Gm11551	23.8151	7.82363	1.58424	4.93841	7.88e-07	7.74e-05	0	0	0	24.4928	38.0769	60.5786	39.2656
ENSMUSG00000034855.13	Cxcl10	5989.73	3.6299	0.735459	4.93556	7.99e-07	7.81e-05	1121.86	1094.15	116.65	10761.3	10351.6	10030.4	7379.87
ENSMUSG00000073489.6	Ifi204	2538.61	1.03263	0.20943	4.93069	8.19e-07	7.95e-05	1814.36	1601.22	1231.41	4002.12	2908.01	2733.22	3032.75
ENSMUSG00000030403.9	Vasp	384.886	-1.1236	0.228965	-4.90729	9.23e-07	8.91e-05	581.328	566.838	480.712	214.72	269.195	272.09	240.76
ENSMUSG00000028037.13	Ifi44	1492.88	1.36713	0.280061	4.88153	1.05e-06	0.000100912	723.091	941.838	628.406	1255.66	2123.45	2003.2	2506.8
ENSMUSG00000101609.1	Kcnq1ot1	986.979	-0.934167	0.192441	-4.85429	1.21e-06	0.000115109	1313.6	1292.74	1360.29	742.948	573.81	624.267	827.678
ENSMUSG00000031353.13	Rbbp7	8349.73	-0.481188	0.0993817	-4.84181	1.29e-06	0.000121835	10553.7	9029.88	9559.68	6751.03	7160.23	7167.78	6747.48
ENSMUSG00000027954.9	Efna1	613.048	1.35074	0.281536	4.79777	1.6e-06	0.000151013	356.956	353.792	239.886	884.189	933.327	576.01	838.01
ENSMUSG00000039997.16	Ifi203	1904.97	1.23628	0.257958	4.79258	1.65e-06	0.00015404	995.398	883.033	1261.52	3419.19	2232.37	1795.8	2414.83
ENSMUSG00000037071.2	Scd1	998.688	-1.70511	0.356225	-4.78662	1.7e-06	0.000157388	1995.89	1856.68	983.061	729.885	466.664	332.669	448.454
ENSMUSG00000040329.14	Il7	3038.11	-1.14939	0.240163	-4.78586	1.7e-06	0.000157388	5429.81	2735.86	4790.19	1780.62	1927.75	1994.99	2077.98
ENSMUSG00000026043.18	Col3a1	3420.74	-0.808884	0.169068	-4.78436	1.72e-06	0.000157626	4167.21	4500	4586.05	2147.2	3101.05	2259.89	2573.96
ENSMUSG00000006362.16	Cbfa2t3	941.682	1.56634	0.327913	4.77669	1.78e-06	0.000162795	392.652	646.851	257.759	1430.38	1082.09	1354.29	1260.63
ENSMUSG00000020400.17	Tnip1	1748.64	0.928709	0.194891	4.76528	1.89e-06	0.000171275	1027.01	979.434	1366.88	2337.43	2404.16	1923.11	1891.98
ENSMUSG00000060519.11	Tor3a	3769.45	0.795825	0.16711	4.76229	1.91e-06	0.000172828	2241.68	2581.62	2936.01	4028.25	5347.59	4425.32	4150.79
ENSMUSG00000029322.12	Plac8	985.48	1.57755	0.334218	4.72012	2.36e-06	0.000211591	329.42	346.079	675.443	1561.82	1492.08	1392.28	925.841
ENSMUSG00000079363.7	Gbp4	1525.5	6.19395	1.31367	4.715	2.42e-06	0.00021573	21.4174	83.8688	0	3347.35	2141.16	2409.8	2407.6
ENSMUSG00000107653.1	Gm31520	1272.56	-1.98822	0.422762	-4.70293	2.56e-06	0.000227581	2765.9	857.005	2883.33	433.522	702.209	400.435	646.849
ENSMUSG00000053477.16	Tcf4	4859.43	0.617361	0.131893	4.68077	2.86e-06	0.000252188	3600.16	4010.28	3275.61	6158.3	5382.13	5038.29	5690.41
ENSMUSG00000025089.15	Gfra1	320.919	1.80044	0.386316	4.66053	3.15e-06	0.000276724	124.425	127.249	136.406	548.638	590.635	241.287	420.555
ENSMUSG00000030921.17	Trim30a	657.15	1.93269	0.41533	4.65337	3.27e-06	0.000284908	340.638	291.131	104.421	1042.58	1011.25	1016.49	675.782
ENSMUSG00000040483.15	Xaf1	2013.76	1.09107	0.234975	4.64333	3.43e-06	0.00029744	1393.15	964.01	1222.01	1979.83	3194.92	2798.93	2181.31
ENSMUSG00000025964.15	Adam23	60.5589	-7.10168	1.53069	-4.63952	3.49e-06	0.000301298	121.365	22.1722	266.226	0	0	0	4.13322
ENSMUSG00000024065.7	Ehd3	1968.38	-1.37444	0.296921	-4.62896	3.68e-06	0.000315325	2376.31	2873.71	3620.86	1111.16	1665.64	735.157	1045.7
ENSMUSG00000060550.15	H2-Q7	5400.66	0.773583	0.167611	4.61535	3.92e-06	0.000334865	2913.78	4273.45	4047.01	6633.46	6105.59	5936.7	6937.61
ENSMUSG00000027078.14	Ube2l6	2587.03	0.923465	0.200667	4.60197	4.19e-06	0.000355169	1399.27	1678.34	1924.73	3217.53	3859.05	3034.06	2532.63
ENSMUSG00000041696.14	Rasl12	292.776	2.46355	0.536208	4.59439	4.34e-06	0.000366316	40.795	134.961	63.0288	447.401	584.436	510.298	214.928
ENSMUSG00000066441.14	Rdh11	360.782	1.74275	0.380087	4.58512	4.54e-06	0.000380819	141.763	195.694	112.887	397.599	417.075	764.933	430.888
ENSMUSG00000090272.8	Mndal	1420.31	1.30201	0.284031	4.58403	4.56e-06	0.000380819	989.278	816.516	454.372	2146.38	1670.96	1673.61	1940.55
ENSMUSG00000066363.12	Serpina3f	15632.4	1.39227	0.304112	4.57816	4.69e-06	0.000389571	6145.76	5222.04	12352.7	23372.6	21889.8	23279.6	14390.8
ENSMUSG00000054263.11	Lifr	39577.2	0.560674	0.122521	4.57613	4.74e-06	0.000391268	31081.7	30370.2	29577.4	43698.4	47034.7	37966.3	50295.1
ENSMUSG00000006418.17	Rnf114	2578.73	0.738637	0.162245	4.5526	5.3e-06	0.00043539	2017.31	1959.83	1478.82	3134.26	3208.2	3033.04	2759.96
ENSMUSG00000020325.10	Fstl3	64.1863	5.79914	1.27471	4.54937	5.38e-06	0.000439793	0	5.78406	0	24.4928	103.605	162.227	141.563
ENSMUSG00000074934.3	Grem1	3123.4	-0.953781	0.209901	-4.54396	5.52e-06	0.000448882	3710.3	3696.01	5219.16	2188.84	1648.82	2344.08	2509.9
ENSMUSG00000090942.1	F830016B08Rik	3262.44	0.758059	0.166904	4.54187	5.58e-06	0.000450989	2012.21	2046.59	2781.73	4218.47	3981.25	3555.65	3664.1
ENSMUSG00000022146.12	Osmr	6381.52	0.796648	0.175947	4.52778	5.96e-06	0.00047964	4354.86	4135.6	4642.49	9921.21	6854.73	6578.42	7062.64
ENSMUSG00000024782.7	Ak3	7958.21	-0.69209	0.153568	-4.50673	6.58e-06	0.000523327	9909.1	8199.87	11650.9	6352.61	6007.3	5501.36	6689.62
ENSMUSG00000039304.11	Tnfsf10	67.96	5.65834	1.25547	4.50696	6.58e-06	0.000523327	0	6.74807	0	133.894	162.934	28.7492	131.23
ENSMUSG00000060802.8	B2m	95410.2	0.529599	0.117531	4.50604	6.6e-06	0.000523327	66476.4	73706.3	82417.2	99403.9	116309	109885	102674
ENSMUSG00000037206.15	Islr	16291	-0.661186	0.146849	-4.5025	6.72e-06	0.000526758	23424.5	17953.7	18942.5	12882.4	13574.9	10768.6	13614.8
ENSMUSG00000047067.7	Dusp28	220.581	1.39386	0.309537	4.50304	6.7e-06	0.000526758	90.7688	105.077	138.287	293.913	327.639	249.502	299.659
ENSMUSG00000057143.15	Trim12c	1348.87	0.818026	0.1821	4.49217	7.05e-06	0.00055018	1090.25	913.881	743.175	1681.02	1660.33	1517.55	1596.46
ENSMUSG00000043091.8	Tuba1c	955.453	-0.601337	0.134262	-4.47883	7.51e-06	0.000582778	1201.41	1131.75	1137.34	809.078	755.34	749.532	734.68
ENSMUSG00000057561.9	Eif1a	2044.89	1.0694	0.239015	4.47417	7.67e-06	0.000592674	1223.85	908.097	1543.73	3104.05	2552.92	2614.12	2006.68
ENSMUSG00000037235.13	Mxd4	3017.09	-0.719932	0.160947	-4.47309	7.71e-06	0.000592736	3661.35	4014.14	3699.88	2205.17	2213.77	1973.42	2817.82
ENSMUSG00000024481.4	Lvrn	31.73	8.2386	1.84853	4.45683	8.32e-06	0.000636341	0	0	0	38.372	91.2075	3.08027	83.6977
ENSMUSG00000026222.16	Sp100	2262.91	0.519467	0.117038	4.43845	9.06e-06	0.000689796	1674.63	1741	1888.04	2433.77	2639.7	2644.92	2415.87
ENSMUSG00000032902.1	Slc16a1	237.424	1.68077	0.380725	4.41465	1.01e-05	0.000766449	145.842	67.4807	94.0728	261.256	324.982	346.017	380.256
ENSMUSG00000062515.3	Fabp4	184.966	-1.45952	0.331065	-4.40856	1.04e-05	0.000784478	356.956	245.822	247.411	111.85	85.0089	110.89	104.364
ENSMUSG00000010607.8	Pigyl	510.518	-0.952459	0.216766	-4.39395	1.11e-05	0.000832047	731.25	574.55	757.286	337.184	386.968	318.294	378.19
ENSMUSG00000029570.5	Lfng	420.642	-1.31268	0.298765	-4.3937	1.11e-05	0.000832047	600.706	777.956	488.238	213.087	324.096	225.886	238.694
ENSMUSG00000106739.1	Gm43499	21.4546	7.67383	1.75034	4.38419	1.16e-05	0.000865077	0	0	0	52.2513	8.8551	55.4448	29.9658
ENSMUSG00000033538.13	Casp4	1061.58	0.934003	0.213515	4.37441	1.22e-05	0.000900463	735.33	530.205	777.041	1218.11	1195.44	1541.16	1246.17
ENSMUSG00000110310.1	4930518J21Rik	16.4597	7.29205	1.66746	4.37315	1.22e-05	0.000901399	0	0	0	31.8406	30.9928	21.5619	27.8992
ENSMUSG00000041481.16	Serpina3g	25494.2	0.986214	0.225889	4.36592	1.27e-05	0.000927326	13202.3	13906.8	20677.2	34097.2	36320.9	33592.4	22111.7
ENSMUSG00000019806.13	Aig1	1137.49	1.06085	0.243307	4.36015	1.3e-05	0.000947665	488.52	770.244	793.034	1261.38	1665.64	1509.33	1269.93
ENSMUSG00000037242.8	Clic4	6540.13	1.07976	0.248051	4.35298	1.34e-05	0.000974604	3500.21	3663.24	4525.84	8721.88	11656	6188.26	6348.63
ENSMUSG00000035258.14	Abi3bp	7028.69	-0.912053	0.210621	-4.3303	1.49e-05	0.00107557	10661.8	8019.6	9395.05	4515.65	4616.16	3986.89	6773.31
ENSMUSG00000021390.6	Ogn	7853.77	-0.836897	0.193431	-4.32659	1.51e-05	0.00108878	11384.9	9505.14	9797.68	5567.21	5347.59	4465.36	7527.63
ENSMUSG00000028967.10	Errfi1	7370.91	-0.76889	0.177828	-4.32377	1.53e-05	0.00109771	8690.35	9004.82	10522	4217.66	5310.4	6382.31	6163.66
ENSMUSG00000020260.9	Pofut2	1469.12	-0.917259	0.213161	-4.30313	1.68e-05	0.00119969	1823.54	1706.3	2347.12	1070.33	815.554	1241.35	1021.94
ENSMUSG00000025492.6	Ifitm3	29607.3	0.628663	0.146148	4.30155	1.7e-05	0.00120276	18850.3	22278.3	24858.7	31112.4	38339.9	35852.2	30667.5
ENSMUSG00000054690.17	Emcn	170.694	1.797	0.418476	4.29416	1.75e-05	0.00123788	68.3316	51.0925	87.4877	345.348	208.98	183.789	220.094
ENSMUSG00000019027.7	Dnah1	32.4502	5.81465	1.35548	4.28974	1.79e-05	0.00125136	0	2.89203	0	95.5218	27.4508	60.5786	35.1324
ENSMUSG00000053318.7	Slamf8	341.511	3.9536	0.921458	4.29059	1.78e-05	0.00125136	43.8546	63.6247	0	431.889	688.041	489.762	611.717
ENSMUSG00000036256.13	Igfbp7	3268.02	-0.528134	0.123195	-4.28697	1.81e-05	0.00126139	3723.56	3737.47	4126.97	2926.89	2796.44	2437.52	2549.16
ENSMUSG00000032475.15	Nck1	3210.53	0.747302	0.174539	4.28158	1.86e-05	0.00128654	2684.31	2254.82	1825.95	3655.14	3664.24	4296.97	3521.5
ENSMUSG00000028792.14	Ak2	2524.84	0.737304	0.172636	4.27087	1.95e-05	0.00133802	1766.42	1645.57	1935.08	3585.74	3071.83	2728.09	2494.4
ENSMUSG00000029231.15	Pdgfra	12270	0.591641	0.138518	4.2712	1.94e-05	0.00133802	9936.64	9475.25	8409.17	15738.2	15102.4	12241	12807.8
ENSMUSG00000021782.14	Dlg5	2645.73	-0.881121	0.206358	-4.26987	1.96e-05	0.0013381	3718.46	3566.84	3186.25	2263.95	1479.69	1589.42	2250.54
ENSMUSG00000005469.10	Prkaca	297.381	1.54582	0.362528	4.26399	2.01e-05	0.00136779	158.081	86.7609	170.272	493.121	433.014	377.846	309.992
ENSMUSG00000034459.8	Ifit1	4454.51	0.935291	0.219863	4.25397	2.1e-05	0.00142421	2991.29	2463.05	3110.99	6559.17	6613.87	4050.55	4601.31
ENSMUSG00000111063.1	Zfp660	41.5392	5.16135	1.21587	4.24499	2.19e-05	0.00147606	0	5.78406	0	83.2755	77.9249	65.7124	50.632
ENSMUSG00000078349.2	AW011738	298.062	1.87513	0.443923	4.224	2.4e-05	0.00161355	157.061	91.5809	96.895	435.971	626.055	401.461	223.194
ENSMUSG00000052727.6	Map1b	6115.11	-1.08135	0.256994	-4.20769	2.58e-05	0.00172704	5696	10333.2	9558.74	4721.39	3279.04	3220.93	4913.37
ENSMUSG00000042961.13	Egflam	124.175	5.24206	1.25021	4.19294	2.75e-05	0.00183537	0	16.3882	0	72.6619	328.524	200.217	228.36
ENSMUSG00000107724.1	Gm16042	1070.3	1.16631	0.278749	4.18407	2.86e-05	0.00190031	447.725	855.077	524.926	1387.11	1276.9	1175.63	1634.69
ENSMUSG00000020388.12	Pdlim4	1598.51	0.96556	0.230917	4.18141	2.9e-05	0.00191455	1028.03	1227.18	770.456	1994.53	2398.85	1849.19	1633.66
ENSMUSG00000028402.18	Mpdz	6015.21	-0.71937	0.172086	-4.18028	2.91e-05	0.00191589	7724.53	7431.55	7523.94	5600.68	4261.07	3573.11	4933
ENSMUSG00000031283.16	Chrdl1	22600.3	-1.0366	0.249065	-4.16199	3.15e-05	0.00206733	40749.1	25413.2	27328.2	15697.4	16275.7	9867.12	18906.4
ENSMUSG00000109680.1	Gm32098	38.5264	3.36653	0.812235	4.14478	3.4e-05	0.00221948	11.2186	4.82005	1.88146	57.1498	61.1002	72.8996	53.7319
ENSMUSG00000003665.6	Has1	35.6448	5.20413	1.25614	4.14294	3.43e-05	0.00222804	0	4.82005	0	83.2755	46.0465	65.7124	43.3988
ENSMUSG00000031980.9	Agt	13283.2	-0.558349	0.135116	-4.13236	3.59e-05	0.00232337	16214	15969.8	15383.7	11883.1	11537.3	8757.2	10884.8
ENSMUSG00000030219.13	Erp27	19.468	7.53291	1.82507	4.12746	3.67e-05	0.00236358	0	0	0	24.4928	16.8247	79.0602	12.3997
ENSMUSG00000006281.7	Tep1	395.661	-0.831	0.2015	-4.12406	3.72e-05	0.00238889	524.216	516.709	502.349	319.223	259.454	298.786	278.992
ENSMUSG00000039699.13	Batf2	203.014	2.03079	0.493091	4.11849	3.81e-05	0.00243723	108.107	31.8123	75.2582	373.923	296.646	215.619	284.159
ENSMUSG00000061436.15	Hipk2	256.89	-1.72399	0.418931	-4.11521	3.87e-05	0.00246154	322.28	376.928	549.385	100.42	78.8103	179.682	145.696
ENSMUSG00000109776.1	Gm30400	46.9639	5.34257	1.29853	4.11432	3.88e-05	0.00246154	0	5.78406	0	128.179	87.6655	71.8729	26.8659
ENSMUSG00000070034.13	Sp110	1863.93	1.03799	0.252431	4.11196	3.92e-05	0.00247663	1341.13	1304.31	756.345	2165.16	2733.57	1937.49	2475.8
ENSMUSG00000017652.16	Cd40	16.1935	7.26785	1.76817	4.11038	3.95e-05	0.00248356	0	0	0	28.5749	22.1377	12.3211	47.532
ENSMUSG00000016194.14	Hsd11b1	727.537	-0.932844	0.227401	-4.1022	4.09e-05	0.00256271	1030.07	947.622	944.491	382.087	491.458	563.689	604.484
ENSMUSG00000089961.1	Gm16567	872.677	0.921466	0.225022	4.095	4.22e-05	0.00263301	575.209	518.637	595.481	1171.57	938.64	841.939	1314.36
ENSMUSG00000068036.14	Afdn	584.307	-1.25429	0.306438	-4.09312	4.26e-05	0.00263861	964.801	512.853	1081.84	386.986	348.005	346.017	348.224
ENSMUSG00000071036.2	Gm10309	1330.89	1.77737	0.434282	4.09266	4.26e-05	0.00263861	996.418	281.491	353.714	1388.74	1750.65	2463.19	1845.48
ENSMUSG00000035399.12	Oser1	1000.65	0.649242	0.159369	4.07383	4.62e-05	0.00284467	697.594	796.272	714.953	1291.59	1136.99	1138.67	1050.87
ENSMUSG00000063171.4	Rps4l	648.869	-1.19743	0.293967	-4.07334	4.63e-05	0.00284467	922.986	683.483	1194.72	341.266	531.306	355.257	398.856
ENSMUSG00000021091.8	Serpina3n	15113.6	0.630846	0.154937	4.07163	4.67e-05	0.00285439	9591.92	11800.4	12255.8	20803.4	17172.7	15356.2	16141.3
ENSMUSG00000053931.11	Cnn3	10538	0.566208	0.139384	4.06223	4.86e-05	0.0029602	8108	7794.98	8274.64	11745.9	11586	14215.4	10167.7
ENSMUSG00000034438.16	Gbp8	86.9805	5.00312	1.23307	4.05747	4.96e-05	0.00300942	0	13.4961	0	75.1112	165.59	168.388	170.495
ENSMUSG00000067586.4	S1pr3	23684.3	0.743918	0.184309	4.03625	5.43e-05	0.00328204	14167.1	17367.6	18450.5	34049.9	30736	24312.5	22497.1
ENSMUSG00000036501.6	Fam13b	679.201	1.17038	0.290713	4.0259	5.68e-05	0.00341651	366.135	459.833	332.077	1049.92	773.935	1054.48	597.25
ENSMUSG00000030352.14	Tspan9	328.042	-1.41634	0.352842	-4.01411	5.97e-05	0.00357797	703.713	398.136	391.343	205.739	150.537	161.201	228.36
ENSMUSG00000016206.6	H2-M3	1730.6	0.926122	0.230998	4.00922	6.09e-05	0.00363883	780.204	1123.07	1438.37	2125.97	2236.8	2186.99	1914.71
ENSMUSG00000025498.15	Irf7	2847.89	1.52473	0.380754	4.00449	6.22e-05	0.00369813	613.965	2137.21	1262.46	4291.95	4913.69	2938.57	3263.18
ENSMUSG00000038886.10	Man2a2	1067.81	-0.649882	0.162331	-4.00343	6.24e-05	0.00370056	1226.91	1192.48	1520.22	876.025	808.47	850.154	812.178
ENSMUSG00000036560.14	Lgi4	394.937	1.78493	0.446773	3.99517	6.46e-05	0.00381741	163.18	178.342	140.168	601.706	851.86	236.154	521.819
ENSMUSG00000045932.12	Ifit2	1008.2	1.01173	0.253478	3.99138	6.57e-05	0.00386428	845.476	505.141	515.519	1383.03	1364.57	1160.23	1104.6
ENSMUSG00000037820.15	Tgm2	4093.89	1.07639	0.269978	3.98694	6.69e-05	0.00392246	1934.7	3119.54	2270.92	5470.05	7121.27	4305.19	3694.07
ENSMUSG00000085396.7	Firre	500.28	-1.35038	0.339411	-3.97862	6.93e-05	0.00404701	1044.35	554.306	643.458	221.251	284.249	276.197	390.589
ENSMUSG00000033192.5	Lpcat2	49.3908	4.35204	1.09439	3.97667	6.99e-05	0.00406505	8.159	3.85604	0	112.667	114.231	23.6154	74.398
ENSMUSG00000026748.13	Plxdc2	9008.37	-0.472177	0.118801	-3.97452	7.05e-05	0.00408653	11836.7	9994.85	9512.64	7611.54	7094.7	7379.29	8038.08
ENSMUSG00000027656.7	Ccn5	23068.5	0.726143	0.183079	3.96629	7.3e-05	0.00421445	13300.2	19873.1	15911.5	31440.6	28540.9	26102.2	22195.4
ENSMUSG00000030217.2	Art4	43.2995	8.68689	2.1926	3.96191	7.44e-05	0.00427667	0	0	0	108.585	0	144.773	42.3655
ENSMUSG00000103441.1	7530428D23Rik	561.062	-1.29264	0.326694	-3.95673	7.6e-05	0.00435429	1002.54	721.079	755.405	213.904	333.837	328.562	473.254
ENSMUSG00000021319.7	Sfrp4	61067.8	-0.485366	0.123001	-3.94603	7.95e-05	0.00453676	63691.2	78862.8	70825.5	46516.7	48023.8	55778.5	52915.6
ENSMUSG00000041567.3	Serpina12	1046.61	-1.24839	0.316805	-3.94056	8.13e-05	0.00462433	1806.2	1296.59	1473.18	704.576	872.227	364.498	624.116
ENSMUSG00000026896.14	Ifih1	3143.86	0.884293	0.224768	3.93425	8.35e-05	0.00473032	2399.76	1967.54	1831.6	5296.16	3383.53	3272.27	3304.51
ENSMUSG00000110790.1	Gm47079	163.881	1.34653	0.342861	3.92735	8.59e-05	0.00485033	73.431	98.329	82.7841	186.962	249.714	181.736	244.893
ENSMUSG00000062519.13	Zfp398	488.941	1.36138	0.347799	3.91428	9.07e-05	0.00510213	326.36	284.383	142.991	521.696	709.293	730.023	619.983
ENSMUSG00000022906.15	Parp9	1578.93	1.16341	0.297381	3.91218	9.15e-05	0.00512808	540.534	1064.27	1096.89	2227.21	2296.13	2064.8	1479.69
ENSMUSG00000056305.4	Usp39	361.66	1.41311	0.362125	3.90227	9.53e-05	0.00532351	179.498	206.298	156.161	298.812	453.381	696.14	476.354
ENSMUSG00000064337.1	mt-Rnr1	2790.21	-0.783681	0.201296	-3.89317	9.89e-05	0.00550747	3032.09	4682.2	3008.45	2094.95	1985.31	1971.37	2257.77
ENSMUSG00000092021.8	Gbp11	355.888	3.84177	0.989398	3.88294	0.000103202	0.00572403	94.8483	26.0283	0	823.774	485.259	479.495	519.753
ENSMUSG00000031590.8	Frg1	1318.12	0.663753	0.171091	3.87954	0.000104653	0.00576468	1008.66	831.94	1049.85	1561.01	1348.63	1725.98	1468.33
ENSMUSG00000062488.9	Ifit3b	843.839	1.41261	0.364122	3.87949	0.000104677	0.00576468	540.534	489.717	235.182	1365.06	1268.05	712.568	1145.93
ENSMUSG00000041319.13	Thoc6	648.626	-1.05423	0.271876	-3.8776	0.000105491	0.00578897	980.1	703.727	1012.22	315.14	520.68	475.388	418.489
ENSMUSG00000035692.6	Isg15	1422.39	0.997446	0.257577	3.87242	0.000107761	0.0058927	793.462	991.002	865.47	1609.18	2522.82	1401.52	1515.86
ENSMUSG00000090222.2	Ifi203-ps	14.8361	7.14176	1.84585	3.86909	0.000109244	0.00595283	0	0	0	35.9228	9.74061	14.3746	41.3322
ENSMUSG00000028367.5	Txn1	1493.57	0.687486	0.177926	3.86388	0.000111601	0.00605999	1183.06	1148.14	906.862	1770.83	1884.36	1813.25	1481.76
ENSMUSG00000018102.5	H2bc4	1214.4	-0.763473	0.197648	-3.86279	0.000112099	0.00606584	1223.85	1537.6	1879.57	942.972	842.12	907.652	952.707
ENSMUSG00000028405.9	Aco1	1869.49	-0.654951	0.169966	-3.85343	0.000116476	0.00628079	2013.23	2160.35	2734.7	1603.46	1376.97	1526.79	1341.23
ENSMUSG00000024597.10	Slc12a2	863.029	-1.11719	0.291289	-3.83534	0.000125391	0.00673814	1584.88	1007.39	1055.5	466.996	527.764	468.2	779.112
ENSMUSG00000047126.17	Cltc	3450.22	-0.44066	0.114939	-3.83386	0.000126147	0.00674047	3690.93	4251.28	3931.3	2830.55	2881.45	2784.56	3169.15
ENSMUSG00000060675.13	Plaat3	297.125	1.4567	0.379986	3.83356	0.000126302	0.00674047	86.6893	163.882	184.383	495.571	438.327	324.455	333.758
ENSMUSG00000070044.15	Fam149a	266.05	1.36566	0.356777	3.82776	0.000129316	0.00687767	117.286	164.846	126.998	324.121	484.374	247.448	349.257
ENSMUSG00000025158.7	Rfng	521.92	-0.875233	0.228737	-3.82638	0.000130042	0.00689268	648.64	709.511	703.664	310.242	418.846	330.615	439.155
ENSMUSG00000053560.4	Ier2	2370.06	1.63113	0.426707	3.8226	0.000132051	0.00697534	1225.89	1354.43	570.081	1546.31	2481.2	3773.33	5219.22
ENSMUSG00000056411.2	Gm12500	19.9715	6.59813	1.72673	3.82118	0.000132815	0.00699194	0	0.96401	0	6.53141	64.6422	27.7224	36.1657
ENSMUSG00000030317.8	Timp4	606.849	-2.14886	0.565776	-3.79807	0.000145826	0.00765092	2183.55	530.205	472.245	189.411	283.363	323.428	160.162
ENSMUSG00000024665.7	Fads2	571.226	1.67493	0.441305	3.79539	0.000147409	0.00770355	238.651	378.856	123.235	716.822	1196.32	644.802	595.184
ENSMUSG00000028007.13	Snx7	1113.26	0.666848	0.175731	3.7947	0.000147821	0.00770355	730.23	913.881	792.093	1131.57	1307.01	1268.04	1451.79
ENSMUSG00000023224.12	Serping1	178109	0.388938	0.102564	3.79217	0.000149338	0.00775659	136410	140777	165445	191199	188462	202832	190093
ENSMUSG00000039316.14	Rftn1	3111.97	-0.818282	0.215983	-3.78864	0.000151473	0.00784124	3614.44	3860.86	4616.15	1628.77	2268.68	2395.42	2848.82
ENSMUSG00000015652.9	Steap1	193.773	1.63995	0.433012	3.7873	0.000152293	0.00785751	58.1329	68.4447	129.82	209.005	320.554	231.02	304.825
ENSMUSG00000020427.11	Igfbp3	4829.64	0.59203	0.156958	3.7719	0.000162009	0.00833111	3203.43	3430.91	4316.06	5751.72	5800.97	4723.08	5726.58
ENSMUSG00000031673.6	Cdh11	18315.9	-0.494559	0.131269	-3.76752	0.000164877	0.00845064	23268.4	19942.5	21005.5	14814	13507.6	14605.6	17843.1
ENSMUSG00000022952.16	Runx1	9914.04	-0.3954	0.105072	-3.76312	0.000167804	0.00857235	10613.8	11430.3	11549.3	9392.98	8533.66	8280.78	7840.72
ENSMUSG00000022048.8	Dpysl2	6799.77	0.564394	0.150453	3.7513	0.000175917	0.00895733	5175.86	5133.35	5303.82	6120.75	8644.34	8321.85	7682.62
ENSMUSG00000074207.10	Adh1	4793.01	-1.51253	0.403502	-3.7485	0.000177895	0.00902848	9702.07	4643.64	7957.62	1881.86	3993.65	1183.85	3348.94
ENSMUSG00000046743.6	Fat4	681.653	-0.970975	0.259173	-3.74644	0.000179364	0.00907335	785.303	1122.11	859.825	511.083	458.694	351.15	562.118
ENSMUSG00000073490.11	Ifi207	387.921	2.94367	0.786494	3.74277	0.000182003	0.00917698	32.636	82.9048	119.472	53.8841	974.061	688.953	691.281
ENSMUSG00000001131.11	Timp1	1759.11	1.23934	0.33153	3.73825	0.000185307	0.00931331	1197.33	1017.03	679.206	1665.51	3612.88	1947.76	1872.35
ENSMUSG00000048852.13	Gm12185	147.183	5.04751	1.35126	3.73541	0.000187412	0.00938872	0	22.1722	0	44.087	200.125	386.06	351.324
ENSMUSG00000021025.8	Nfkbia	7532.44	0.642773	0.17217	3.73335	0.000188947	0.00943521	4787.29	5066.84	6826.86	9953.05	8693.93	7509.69	8560.93
ENSMUSG00000001918.17	Slc1a5	13966.2	-0.690788	0.185117	-3.73164	0.000190239	0.00946929	17679.5	15964	18553	10824.2	12237.7	7691.43	12347
ENSMUSG00000054604.7	Cggbp1	2444.44	0.846938	0.227137	3.72875	0.000192435	0.00954798	1887.79	1661.95	1358.41	3505.73	2158.87	3445.79	2662.83
ENSMUSG00000024678.6	Ms4a4d	7322.08	0.504916	0.135493	3.7265	0.000194153	0.00960254	6101.91	6155.2	5015.96	8449.19	7613.61	9103.21	7515.23
ENSMUSG00000107481.1	4833403J16Rik	14.2981	7.0896	1.90463	3.72231	0.000197411	0.00973267	0	0	0	40.8213	24.7943	5.13378	26.8659
ENSMUSG00000016262.14	Sertad4	33.533	8.31802	2.23866	3.71563	0.000202698	0.00996168	0	0	0	72.6619	0	110.89	45.4654
ENSMUSG00000114310.1	Gm48602	46.001	4.71388	1.26992	3.71195	0.000205668	0.0100758	0	8.67609	0	94.7054	67.2987	59.5518	83.6977
ENSMUSG00000031584.16	Gsr	2403.98	0.600513	0.161999	3.70689	0.000209822	0.010247	1745.01	2083.22	1599.24	3151.41	2672.47	2660.32	2489.23
ENSMUSG00000022032.14	Scara5	3096.71	-0.741393	0.20014	-3.70438	0.000211908	0.0103164	3551.2	3490.68	4715.87	2615.01	2226.17	1823.52	2711.39
ENSMUSG00000019899.16	Lama2	985.721	-1.06903	0.288942	-3.6998	0.000215772	0.0104717	1406.41	1237.79	1468.48	576.397	519.794	523.645	995.073
ENSMUSG00000011008.13	Mcoln2	38.9966	8.53661	2.30885	3.69734	0.000217866	0.0105404	0	0	0	193.493	58.4436	0	14.4663
ENSMUSG00000108825.1	Gm45838	19.2335	5.64117	1.52644	3.69565	0.000219324	0.0105779	0	1.92802	0	17.145	52.2451	28.7492	30.9992
ENSMUSG00000029381.16	Shroom3	648.326	-0.880689	0.238986	-3.6851	0.000228612	0.0109918	811.82	749.036	1005.64	556.803	362.173	461.013	478.42
ENSMUSG00000040569.13	Slc26a7	10087.7	-0.930491	0.252642	-3.68304	0.000230466	0.0110467	16394.5	10432.5	13689.5	9299.09	6692.68	4608.08	7739.46
ENSMUSG00000052488.7	Cherp	834.32	-0.902847	0.245557	-3.67674	0.000236235	0.0112778	918.907	1343.83	1059.26	639.262	591.52	448.692	690.248
ENSMUSG00000055322.15	Tns1	1814.89	-0.780626	0.212346	-3.67619	0.000236739	0.0112778	1946.94	2522.81	2501.4	1592.03	998.855	1398.44	1423.89
ENSMUSG00000067818.6	Myl9	3106.26	-0.789744	0.21498	-3.67357	0.000239185	0.0113595	4651.65	3286.31	4031.02	1698.17	2231.48	2566.89	2731.03
ENSMUSG00000024810.16	Il33	383.361	6.32779	1.72804	3.66184	0.000250414	0.011718	0	24.1002	0	242.478	911.189	621.187	814.245
ENSMUSG00000028793.15	Rnf19b	999.389	0.916551	0.250173	3.66367	0.000248624	0.011718	478.321	584.19	876.759	1298.93	1246.8	1219.79	1113.9
ENSMUSG00000030737.17	Slco2b1	1199.31	-0.724543	0.197868	-3.66174	0.000250507	0.011718	1562.45	1490.36	1476.94	982.977	1087.41	869.662	711.947
ENSMUSG00000108298.1	Gm44226	19.0449	5.62842	1.53683	3.66237	0.000249897	0.011718	0	1.92802	0	54.7005	30.1073	25.6689	17.5662
ENSMUSG00000017057.9	Il13ra1	589.047	2.0012	0.546247	3.66355	0.00024874	0.011718	49.9739	226.542	357.477	789.484	990.885	905.598	697.481
ENSMUSG00000029461.17	Fam168a	1091.93	-0.694604	0.189843	-3.65884	0.000253363	0.011816	1477.8	1203.08	1405.45	976.446	727.889	907.652	753.279
ENSMUSG00000021136.13	Smoc1	1701.8	-0.987108	0.2707	-3.6465	0.000265837	0.0123606	2970.89	1813.3	2160.85	1180.55	1288.42	780.334	1419.76
ENSMUSG00000045319.13	Proser2	43.8447	3.51313	0.964083	3.64402	0.000268415	0.0124432	3.05962	12.5321	2.82218	138.792	69.9553	42.097	29.9658
ENSMUSG00000001552.14	Jup	1180.06	-0.545165	0.149899	-3.63688	0.000275957	0.0127548	1365.61	1291.77	1550.32	962.566	888.166	1043.18	950.641
ENSMUSG00000109378.1	Gm49396	766.969	-1.25512	0.345883	-3.62875	0.000284802	0.0131245	1554.29	731.683	1074.31	664.571	451.61	401.461	357.524
ENSMUSG00000028932.7	Psmc2	4037.94	0.516745	0.142801	3.61863	0.00029617	0.013608	3051.47	3148.46	3276.55	5426.78	4044.12	4331.88	4274.78
ENSMUSG00000061740.7	Cyp2d22	480.936	-0.938729	0.259907	-3.61179	0.000304092	0.0139308	706.773	536.953	692.376	358.411	331.181	254.635	401.956
ENSMUSG00000057092.12	Fxyd3	109.757	3.57717	0.990804	3.61037	0.000305756	0.0139658	22.4372	11.5681	10.348	309.425	334.723	33.8829	25.8326
ENSMUSG00000041736.7	Tspo	643.441	0.896459	0.249137	3.59826	0.000320353	0.0145897	455.884	451.157	353.714	614.769	975.832	738.237	798.745
ENSMUSG00000027300.9	Ubox5	282.831	-1.48609	0.413647	-3.59265	0.000327337	0.0148208	574.189	232.326	502.349	204.107	132.826	149.906	135.363
ENSMUSG00000056367.14	Actr3b	79.1339	4.66611	1.29855	3.59334	0.000326465	0.0148208	0	15.4242	0	170.633	147.88	144.773	60.965
ENSMUSG00000110972.1	5830462O15Rik	40.2721	-4.01399	1.11792	-3.5906	0.00032992	0.0148944	160.12	37.5964	56.4437	4.89856	9.74061	0	6.19983
ENSMUSG00000021537.9	Cetn3	1738.18	0.539882	0.150519	3.5868	0.000334762	0.0150691	1513.49	1253.21	1269.98	1930.03	1830.35	2200.34	1862.02
ENSMUSG00000024789.12	Jak2	1588.67	1.17143	0.326782	3.58474	0.000337408	0.0151443	1277.9	964.974	464.72	1912.07	2105.74	2320.47	1790.72
ENSMUSG00000024899.6	Papss2	1025.85	1.03964	0.290547	3.5782	0.000345964	0.0154836	772.045	677.699	421.446	1539.78	1492.97	1078.09	1015.74
ENSMUSG00000049950.6	Rpp38	289.72	0.842189	0.235929	3.56968	0.000357419	0.0159503	198.876	179.306	205.079	342.899	393.166	336.776	320.325
ENSMUSG00000060591.9	Ifitm2	13418.1	0.51186	0.143683	3.56242	0.000367453	0.0163511	10713.8	9368.25	11482.5	13183.6	16399.6	16774.1	13613.8
ENSMUSG00000024235.10	Map3k8	438.957	2.17903	0.612118	3.55982	0.000371112	0.0164668	48.954	288.239	87.4877	615.585	330.295	915.866	708.847
ENSMUSG00000026475.7	Rgs16	1085.9	1.39699	0.392688	3.5575	0.000374402	0.0165654	773.065	265.103	605.829	1205.05	1662.1	1897.44	998.173
ENSMUSG00000110104.1	Gm45717	778.616	-2.99587	0.842419	-3.55626	0.000376167	0.0165962	62.2124	2130.46	2356.52	80.0097	309.928	139.639	230.427
ENSMUSG00000064363.1	mt-Nd4	11255.6	-0.436108	0.122689	-3.55459	0.000378565	0.0166547	11580.7	14042.7	13051.7	9197.04	10222.3	8614.48	10077.8
ENSMUSG00000034780.6	B3galt1	276.239	1.59302	0.449085	3.54726	0.00038926	0.0170769	98.9278	170.63	105.362	238.396	371.029	606.812	292.425
ENSMUSG00000040528.15	Milr1	225.603	2.1983	0.620411	3.5433	0.000395152	0.0172865	62.2124	132.069	21.6367	223.701	478.175	351.15	268.659
ENSMUSG00000063286.7	Gvin-ps7	19.5876	6.57031	1.85684	3.53844	0.000402503	0.0175586	0	0	0.940728	44.087	4.42755	73.9264	10.3331
ENSMUSG00000025658.16	Cnksr2	33.3333	-8.7825	2.48395	-3.5357	0.000406691	0.0176007	87.7092	0	140.168	0	0	0	0
ENSMUSG00000059327.9	Eda	377.992	-1.77991	0.503383	-3.53589	0.00040641	0.0176007	968.881	319.087	571.022	88.174	165.59	210.485	257.293
ENSMUSG00000073771.11	Btbd19	57.0512	3.42356	0.968315	3.53559	0.000406868	0.0176007	13.2584	0.96401	11.2887	155.937	108.918	29.7759	69.2314
ENSMUSG00000000392.17	Fap	8053.87	0.287593	0.0814732	3.52992	0.000415692	0.0179325	6816.84	7116.32	6982.08	8923.54	8528.34	8143.2	8439
ENSMUSG00000052776.10	Oas1a	729.559	1.23721	0.350666	3.52817	0.000418443	0.0180012	232.531	421.272	547.504	856.431	1283.99	830.645	802.878
ENSMUSG00000045658.16	Pid1	1889.61	-0.922293	0.262974	-3.50716	0.00045292	0.0194305	2987.21	2068.76	2514.57	865.412	1647.93	1281.39	1527.22
ENSMUSG00000018171.9	Vmp1	6112.45	0.707996	0.201986	3.50517	0.000456324	0.0195226	5251.33	3131.1	4747.85	6506.1	7173.51	8251.01	6644.15
ENSMUSG00000021375.10	Kif13a	191.526	-1.10696	0.316118	-3.50172	0.000462258	0.0196681	271.287	295.951	239.886	126.546	132.826	94.4615	145.696
ENSMUSG00000058624.12	Gda	79.6437	2.78688	0.795822	3.50189	0.000461978	0.0196681	9.17887	30.8483	13.1702	122.464	244.401	70.8461	51.6653
ENSMUSG00000028018.15	Gstcd	113.909	-1.48301	0.424237	-3.49572	0.000472788	0.0200612	229.472	139.781	157.102	58.7827	59.3291	51.3378	81.6311
ENSMUSG00000066415.4	Msl2	429.719	1.16984	0.334881	3.4933	0.000477082	0.0201883	177.458	347.043	207.901	598.44	433.9	517.485	649.949
ENSMUSG00000046337.17	Fam178b	11.0714	6.71804	1.92365	3.49234	0.000478805	0.0202061	0	0	0	12.2464	9.74061	20.5351	33.0658
ENSMUSG00000027603.15	Ggt7	417.272	-1.21573	0.348429	-3.48916	0.000484535	0.0203925	356.956	600.578	851.359	262.073	268.309	231.02	276.926
ENSMUSG00000037608.16	Bclaf1	4625.1	0.358607	0.102841	3.48701	0.000488453	0.0204763	3734.78	4089.33	3822.18	4999.79	5285.61	4629.64	4991.9
ENSMUSG00000052155.5	Acvr2a	2304.5	-0.761837	0.218503	-3.48662	0.000489164	0.0204763	2117.26	3565.87	3116.63	1992.08	1717	1502.14	1710.12
ENSMUSG00000052713.8	Zfp608	659.455	-0.673151	0.193256	-3.48321	0.000495431	0.0206829	870.973	699.871	880.521	550.271	480.832	465.12	552.818
ENSMUSG00000034422.14	Parp14	2079.69	0.785674	0.225769	3.47999	0.000501426	0.020832	1445.16	1444.09	1412.97	2839.53	2425.41	1658.21	2966.62
ENSMUSG00000078442.3	Ccdc105	11.665	6.79649	1.9531	3.47986	0.000501685	0.020832	0	0	0	40.0049	15.9392	7.18729	16.5329
ENSMUSG00000069892.9	9930111J21Rik2	166.73	1.39433	0.400791	3.47896	0.00050337	0.0208462	105.047	75.1928	72.436	184.512	281.592	158.12	260.393
ENSMUSG00000025171.1	Ubtd1	73.1847	-1.75814	0.506006	-3.47455	0.000511715	0.0211355	105.047	126.285	126.998	50.6184	26.5653	25.6689	38.2323
ENSMUSG00000046805.9	Mpeg1	356.557	3.62021	1.04284	3.47149	0.000517575	0.0213208	70.3714	69.4087	0	1248.32	341.807	432.264	272.793
ENSMUSG00000057286.6	St6galnac2	1129.14	0.652568	0.188038	3.4704	0.000519687	0.0213511	837.317	849.293	801.5	1081.77	1331.81	1224.92	1576.82
ENSMUSG00000034723.11	Tmx4	638.449	1.12604	0.325242	3.46218	0.000535822	0.021956	458.944	379.82	275.633	1160.96	678.3	801.896	601.384
ENSMUSG00000023947.7	Nfkbie	2222.87	1.54059	0.445815	3.45568	0.0005489	0.0224327	1055.57	1671.59	378.173	4022.53	3636.79	2265.02	2130.68
ENSMUSG00000033060.15	Lmo7	6062.09	-0.83513	0.241855	-3.45302	0.000554337	0.0225954	9256.38	7700.51	6714.92	4322.98	3101.94	4075.19	6199.83
ENSMUSG00000024778.12	Fas	921.546	0.928718	0.269137	3.45072	0.000559085	0.0227293	533.394	431.876	812.789	1283.42	971.404	1186.93	1069.47
ENSMUSG00000017144.8	Rnd3	5378.39	0.570991	0.165536	3.44934	0.000561949	0.0227861	4932.11	3979.43	3400.73	5518.22	5785.92	6327.89	6751.62
ENSMUSG00000038527.9	C1rl	544.884	0.916771	0.266395	3.4414	0.00057872	0.0233509	326.36	276.671	454.372	651.508	696.896	756.719	554.885
ENSMUSG00000074582.10	Arfgef2	1094.28	-0.864845	0.251312	-3.44132	0.000578885	0.0233509	1448.22	1451.8	1411.09	988.692	769.508	518.511	879.343
ENSMUSG00000022216.16	Psme1	1682.99	0.531019	0.154537	3.4362	0.000589947	0.0236741	1275.86	1446.02	1201.31	1792.06	2059.7	2011.41	1693.59
ENSMUSG00000028790.13	Khdrbs1	349.13	1.62483	0.472811	3.43654	0.000589195	0.0236741	178.478	174.486	112.887	202.474	608.345	684.846	418.489
ENSMUSG00000007041.9	Clic1	2479.52	-0.486074	0.1417	-3.4303	0.000602903	0.0240079	2574.16	2752.25	3341.47	1975.75	2013.65	2166.45	2094.51
ENSMUSG00000028322.11	Exosc3	909.164	0.806752	0.235149	3.43082	0.000601769	0.0240079	447.725	776.992	635.932	1157.69	1051.98	1096.58	1035.37
ENSMUSG00000109904.1	Gm45819	10.9904	-7.18178	2.09315	-3.43109	0.000601162	0.0240079	25.4969	24.1002	25.3997	0	0	0	0
ENSMUSG00000020432.12	Tcn2	3749.37	-0.697395	0.203499	-3.42701	0.000610258	0.0242386	3607.3	4739.07	5693.29	2881.17	3073.6	2329.71	3258.01
ENSMUSG00000026387.15	Sctr	32.7016	3.5279	1.03079	3.42252	0.000620439	0.0245801	6.11925	0	7.52582	57.1498	38.0769	53.3913	60.965
ENSMUSG00000055172.10	C1ra	9053.73	0.519886	0.152351	3.41242	0.000643884	0.025444	5892.84	7452.76	7869.19	11487.1	10254.2	9889.71	8923.62
ENSMUSG00000089774.2	Slc5a3	7959.27	-0.648212	0.190055	-3.41066	0.000648065	0.0255443	11718.4	8311.69	9321.67	7153.52	4942.03	7111.31	5760.68
ENSMUSG00000098557.1	Kctd12	4903.86	-0.551159	0.162111	-3.39988	0.000674143	0.0265049	7001.44	5012.85	5508.9	4104.17	3475.62	3963.28	4399.81
ENSMUSG00000031812.16	Map1lc3b	10469.5	0.378937	0.111564	3.39658	0.000682329	0.026759	8176.34	9146.52	8805.21	10584.1	12073.9	12128	10504.6
ENSMUSG00000038205.12	Prkab2	1149.9	-0.749822	0.220888	-3.39458	0.00068734	0.0268876	1423.74	1246.46	1706.48	734.783	731.431	999.033	1005.41
ENSMUSG00000043505.8	Gimap5	93.0005	4.50217	1.32797	3.39027	0.000698249	0.0272457	0	20.2442	0	240.029	174.445	120.13	79.5645
ENSMUSG00000028675.12	Pnrc2	3748.58	0.407219	0.120185	3.38826	0.000703388	0.0273775	2920.92	3348.97	2968.94	4432.38	3881.19	4204.56	3818.06
ENSMUSG00000110831.1	Gm48159	184.149	-1.13256	0.334475	-3.38608	0.000708981	0.0275262	305.962	258.355	217.308	138.792	118.658	90.3545	127.097
ENSMUSG00000085564.1	Gm12198	40.4068	4.8948	1.44701	3.38271	0.000717739	0.0277967	0	6.74807	0	163.285	31.8784	42.097	32.0325
ENSMUSG00000047250.13	Ptgs1	208.19	-2.43524	0.720123	-3.3817	0.000720388	0.0278299	345.738	186.054	608.651	13.8792	72.6118	127.318	67.1648
ENSMUSG00000020696.18	Rffl	1062.61	0.902405	0.267299	3.37601	0.000735447	0.0283412	754.707	858.933	461.897	1394.46	1456.66	1252.64	1068.44
ENSMUSG00000073980.5	Gm9574	62.8982	1.90228	0.563754	3.37431	0.000739998	0.028446	18.3577	26.0283	27.2811	115.933	52.2451	92.408	97.1307
ENSMUSG00000097346.1	Rps18-ps4	9.41337	6.48548	1.92468	3.36964	0.000752678	0.028862	0	0	0	13.0628	21.2522	15.4013	14.4663
ENSMUSG00000090063.6	Dlx6os1	203.746	-1.03106	0.306096	-3.36842	0.000755989	0.0289175	303.923	310.411	226.715	129.812	133.712	122.184	163.262
ENSMUSG00000015165.16	Hnrnpl	846.309	-0.523277	0.155384	-3.36765	0.000758128	0.0289281	1037.21	924.485	1034.8	722.537	742.057	641.722	671.648
ENSMUSG00000041449.16	Serpina3h	194.14	1.5985	0.47498	3.3654	0.000764336	0.0290852	55.0732	77.1208	130.761	258.807	380.769	172.495	249.026
ENSMUSG00000005087.17	Cd44	1326.55	1.321	0.392593	3.3648	0.00076599	0.0290852	324.32	724.935	1040.45	1725.92	1972.92	2114.09	1144.9
ENSMUSG00000063281.9	Zfp35	434.2	-1.38276	0.411419	-3.36096	0.000776728	0.0294209	621.104	339.331	1001.88	320.855	203.667	226.913	251.093
ENSMUSG00000049670.8	Morn4	30.3426	8.17456	2.43487	3.35729	0.00078712	0.029742	0	0	0	95.5219	107.147	0	4.13322
ENSMUSG00000097494.7	4933406C10Rik	11.0257	6.71365	2.00202	3.35344	0.000798136	0.0300851	0	0	0	12.2464	30.9928	26.6956	5.16653
ENSMUSG00000050953.10	Gja1	81067.9	-0.453607	0.135496	-3.34775	0.000814702	0.0305612	103866	76238.7	100263	64879.7	65446.2	69470.3	73052.6
ENSMUSG00000092188.1	Gm20471	10.9506	-7.17636	2.14332	-3.34824	0.000813272	0.0305612	37.7354	14.4602	22.5775	0	0	0	0
ENSMUSG00000029470.15	P2rx4	6870.56	0.538248	0.161183	3.33936	0.000839716	0.0314236	4460.93	5950.83	5551.24	9219.9	7223.1	7102.07	7370.57
ENSMUSG00000104168.1	Gm38250	24.8588	4.67183	1.39946	3.3383	0.000842927	0.0314679	0	4.82005	0	55.517	23.9088	53.3913	32.0325
ENSMUSG00000076928.5	Trac	27.1595	5.13342	1.53877	3.33605	0.000849779	0.0316476	0	3.85604	0	40.8213	106.261	18.4816	15.4996
ENSMUSG00000017446.14	C1qtnf1	466.394	0.910702	0.273208	3.33337	0.000858006	0.0318776	367.155	291.131	249.293	437.604	627.826	551.368	657.182
ENSMUSG00000024052.17	Lpin2	625.184	-0.878698	0.263717	-3.33198	0.000862318	0.0318852	910.748	677.699	885.225	541.29	337.379	398.381	516.653
ENSMUSG00000109947.1	Gm45669	458.143	-0.999851	0.300056	-3.33222	0.000861573	0.0318852	448.745	606.362	820.315	262.889	322.325	369.632	295.525
ENSMUSG00000035373.2	Ccl7	1490.96	0.828571	0.249019	3.32734	0.000876803	0.0323438	824.059	925.449	1271.86	2256.6	1780.76	1773.21	1341.23
ENSMUSG00000093661.1	Eif4e3	2382.55	0.557272	0.167534	3.32632	0.000880022	0.0323856	1708.29	1775.71	2004.69	2602.77	2699.03	3202.45	2260.87
ENSMUSG00000023186.14	Vwa5a	2382.31	0.638966	0.192207	3.32437	0.000886199	0.0325359	1894.93	1842.22	1546.56	3134.26	2148.25	3152.14	2537.8
ENSMUSG00000024812.9	Tjp2	26.9384	8.00238	2.41409	3.31486	0.000916889	0.0335832	0	0	0	0	133.712	14.3746	35.1324
ENSMUSG00000081769.9	Gm12216	1103.54	0.80466	0.24291	3.31258	0.00092439	0.0337783	915.847	718.187	628.406	1689.18	1045.79	1213.62	1320.56
ENSMUSG00000034105.9	Meak7	24.2434	7.85016	2.37499	3.30534	0.000948595	0.0345004	0	0	0	0	100.063	26.6956	38.2323
ENSMUSG00000045326.13	Fndc7	24.3776	7.85876	2.3775	3.30547	0.000948156	0.0345004	0	0	0	52.2513	98.2916	0	15.4996
ENSMUSG00000040268.17	Plekha1	633.067	1.15748	0.350564	3.30177	0.000960782	0.034862	341.658	328.727	416.743	1142.18	435.671	870.689	786.345
ENSMUSG00000026553.17	Copa	5926.77	-0.371543	0.112933	-3.28995	0.00100205	0.0361064	6839.28	6222.68	6856.97	5753.35	5065.11	4888.38	4815.2
ENSMUSG00000040229.11	Gpr34	10.3641	-7.09696	2.15634	-3.29121	0.000997578	0.0361064	31.6161	22.1722	16.9331	0	0	0	0
ENSMUSG00000097415.2	AU020206	458.485	1.27714	0.388136	3.29046	0.00100025	0.0361064	182.558	392.352	163.687	695.595	672.987	477.441	542.485
ENSMUSG00000028869.13	Gnl2	1697.33	0.869348	0.264404	3.28795	0.00100919	0.0362794	1312.58	1261.89	795.856	2496.63	1914.47	2299.93	1498.29
ENSMUSG00000049396.6	Gemin4	84.5435	2.44336	0.743819	3.28489	0.00102022	0.0365913	13.2584	7.71208	48.9179	97.9711	126.628	107.809	174.629
ENSMUSG00000103442.5	Pcdha1	26.6339	7.98545	2.43189	3.28364	0.00102477	0.0366699	0	0	0	26.9421	11.5116	0	143.629
ENSMUSG00000021010.8	Npas3	51.4957	3.7164	1.13422	3.27662	0.00105058	0.0375068	13.2584	5.78406	0	146.14	49.5885	105.756	30.9992
ENSMUSG00000028126.16	Pip5k1a	698.301	0.969548	0.296309	3.27208	0.00106758	0.0379394	451.805	546.593	320.788	1097.28	808.47	905.598	633.416
ENSMUSG00000071648.3	Rom1	209.921	-2.37756	0.726604	-3.27215	0.00106733	0.0379394	60.1726	443.445	635.932	67.7634	41.6189	82.1404	101.264
ENSMUSG00000031737.11	Irx5	81.8112	2.64032	0.807923	3.26804	0.00108296	0.0383982	5.09937	43.3804	11.2887	93.0726	149.651	170.441	84.731
ENSMUSG00000036533.8	Cdc42ep3	4942.38	0.803291	0.246082	3.26432	0.00109728	0.0388172	4473.17	3589.01	2073.36	5598.23	6152.52	6038.35	5790.64
ENSMUSG00000039756.12	Dnttip2	1633.63	0.600717	0.184328	3.25896	0.00111821	0.0394678	1254.45	1219.47	1215.42	2262.32	1974.69	1692.09	1527.22
ENSMUSG00000039994.15	Timeless	885.553	0.871714	0.267882	3.2541	0.00113752	0.039843	466.083	637.211	652.865	780.503	1378.74	1121.22	1002.31
ENSMUSG00000057738.13	Sptan1	1280.88	-0.739206	0.22706	-3.25556	0.00113171	0.039843	1628.74	1786.31	1443.08	991.958	1054.64	685.873	1148
ENSMUSG00000073421.5	H2-Ab1	310.206	3.22259	0.990437	3.25371	0.0011391	0.039843	53.0335	104.113	0	469.445	414.418	524.672	550.752
ENSMUSG00000079555.2	Haus3	1655.54	-1.00119	0.307602	-3.25483	0.0011346	0.039843	2980.07	1431.56	2372.52	747.03	1324.72	1237.24	1204.83
ENSMUSG00000021039.9	Snw1	4393.73	0.347469	0.106856	3.25175	0.00114695	0.0398688	3510.41	3538.88	4069.59	4732.01	4482.45	4887.36	4758.37
ENSMUSG00000029755.10	Dlx5	2122.78	-0.56432	0.173528	-3.25204	0.0011458	0.0398688	2850.55	2473.65	2292.55	1505.49	1906.5	1516.52	1937.45
ENSMUSG00000104061.1	Gm37953	28.1374	-7.80912	2.40162	-3.25161	0.00114754	0.0398688	0	13.4961	177.798	0	0	1.02676	0
ENSMUSG00000031503.13	Col4a2	2841.63	-0.508323	0.156464	-3.24883	0.00115882	0.0400813	3230.96	3830.97	2943.54	2241.09	2623.76	2114.09	2399.34
ENSMUSG00000041134.15	Cyyr1	314.191	1.28669	0.395979	3.24939	0.00115654	0.0400813	189.697	97.365	217.308	381.271	289.562	447.665	521.819
ENSMUSG00000030067.17	Foxp1	4622.06	0.517931	0.159453	3.24818	0.00116146	0.0400833	4118.25	3145.56	3579.47	4531.16	5881.56	5478.77	4795.57
ENSMUSG00000002032.17	Tmem25	21.8248	7.69855	2.37219	3.24533	0.00117313	0.04039	0	0	0	59.5991	0	63.6588	25.8326
ENSMUSG00000006731.10	B4galnt1	89.4847	2.26464	0.697941	3.24475	0.00117555	0.04039	13.2584	53.9845	15.0516	200.024	122.2	90.3545	115.73
ENSMUSG00000032869.15	Psmf1	909.378	0.604563	0.186372	3.24386	0.00117922	0.0404266	625.183	683.483	741.294	1137.28	1163.56	902.518	950.641
ENSMUSG00000073555.1	Gm4951	17243	0.712362	0.219664	3.24296	0.00118295	0.0404652	15459.3	8143.95	13364	23176.7	20078.9	19760.9	17684
ENSMUSG00000059498.13	Fcgr3	26.8342	-8.46942	2.61542	-3.23827	0.00120257	0.0410458	140.743	42.4164	0	0	0	0	0
ENSMUSG00000057134.5	Ado	3565.33	0.591172	0.182717	3.23546	0.00121447	0.0413613	3281.96	2610.54	2193.78	3482.06	4480.68	4079.3	4193.15
ENSMUSG00000024862.16	Klc2	43.6306	-2.37275	0.73421	-3.2317	0.00123055	0.0418172	55.0732	105.077	76.199	8.98069	7.96959	23.6154	20.6661
ENSMUSG00000022309.8	Angpt1	4611.53	-0.794816	0.246342	-3.22648	0.00125325	0.0423436	7581.75	4750.64	5465.63	4167.85	2310.3	3421.15	3780.86
ENSMUSG00000027605.18	Acss2	291.289	1.24591	0.386179	3.22625	0.00125422	0.0423436	149.922	227.506	99.7172	321.672	417.075	312.134	458.788
ENSMUSG00000044749.13	Abca6	245.035	1.56699	0.485513	3.22748	0.00124885	0.0423436	59.1527	120.501	158.042	441.687	428.587	243.341	220.094
ENSMUSG00000097180.5	2700038G22Rik	51.4593	-2.92147	0.905827	-3.22519	0.00125887	0.0424084	136.663	80.9768	80.9026	11.43	6.19857	3.08027	32.0325
ENSMUSG00000104052.1	Gm38125	23.1806	-4.7655	1.4788	-3.22254	0.00127061	0.0426501	62.2124	14.4602	74.3175	3.2657	0	0	4.13322
ENSMUSG00000113140.1	Gm48624	24.7928	-6.83662	2.12164	-3.22233	0.00127154	0.0426501	72.4111	0	95.0135	0	0	1.02676	1.0333
ENSMUSG00000078307.3	AI593442	23.3833	7.79777	2.42089	3.22103	0.00127729	0.0427507	0	0	0	0	64.6422	82.1404	12.3997
ENSMUSG00000032841.15	Prr5l	292.661	1.3398	0.416431	3.21734	0.00129385	0.0432117	135.643	193.766	126.998	568.232	425.93	224.859	321.358
ENSMUSG00000050855.16	Zfp940	126.663	2.2398	0.696614	3.21527	0.00130321	0.0434309	45.8944	45.3085	27.2811	251.459	300.188	147.853	45.4654
ENSMUSG00000035504.16	Reep6	25.2932	-8.38428	2.60932	-3.2132	0.00131263	0.0436478	70.3714	0	102.539	0	0	0	0
ENSMUSG00000038301.15	Snx10	1488.53	0.961099	0.299164	3.21261	0.00131534	0.0436478	1119.82	565.874	1141.1	2028	1556.73	2260.92	1485.89
ENSMUSG00000038213.7	Tapbpl	1330.26	0.788573	0.245719	3.20925	0.00133081	0.044067	641.501	1122.11	983.061	1613.26	1556.73	1834.81	1322.63
ENSMUSG00000046610.14	Oacyl	22.049	7.71372	2.4097	3.20112	0.00136896	0.0452339	0	0	0	88.9904	0	44.1505	17.5662
ENSMUSG00000042726.14	Trafd1	1926.78	0.447261	0.139752	3.2004	0.00137236	0.0452501	1460.46	1678.34	1525.86	1921.05	2351.03	2112.04	2094.51
ENSMUSG00000028224.14	Nbn	706.441	0.596451	0.186536	3.19752	0.00138617	0.045512	470.162	516.709	611.473	857.247	823.524	809.083	731.58
ENSMUSG00000113687.1	Gm49703	12.2804	6.86993	2.14821	3.19798	0.00138393	0.045512	0	0	0	48.1691	1.77102	11.2943	22.7327
ENSMUSG00000036218.15	Pdzrn4	1485.73	-0.855648	0.26771	-3.19618	0.00139261	0.0456269	2158.05	1913.56	1764.81	999.306	732.316	1036	1535.49
ENSMUSG00000047407.17	Tgif1	572.127	0.834661	0.261445	3.19249	0.00141051	0.0460757	341.658	333.547	480.712	809.895	551.673	755.692	631.35
ENSMUSG00000062906.12	Hdac10	469.92	-0.895018	0.280382	-3.19214	0.00141223	0.0460757	612.945	661.311	592.659	245.744	379.884	286.465	426.755
ENSMUSG00000026643.16	Nmt2	1392.05	0.589639	0.184867	3.18954	0.001425	0.0462009	1159.6	982.326	1017.87	1789.61	1257.42	1569.91	1723.55
ENSMUSG00000104420.1	E230020A03Rik	86.445	2.54972	0.799314	3.18989	0.00142329	0.0462009	28.5565	33.7403	4.70364	192.677	181.53	68.7926	79.5645
ENSMUSG00000104986.1	1600023N17Rik	20.1742	7.58488	2.3778	3.18987	0.00142339	0.0462009	0	0	0	44.087	0	37.99	55.7985
ENSMUSG00000028633.7	Ctps	548.758	1.97884	0.620732	3.18791	0.00143305	0.0462762	155.021	401.992	40.4513	829.489	997.084	598.598	719.18
ENSMUSG00000086740.1	Gm17029	154.033	-1.65181	0.518155	-3.18786	0.00143328	0.0462762	345.738	172.558	220.13	65.3141	118.658	87.2742	41.3322
ENSMUSG00000022661.14	Cd200	5191.42	0.887887	0.279407	3.17775	0.0014842	0.0477535	4153.95	3202.44	2860.75	4094.38	8778.94	5058.82	7254.84
ENSMUSG00000028381.8	Ugcg	1156.64	0.928304	0.292144	3.17756	0.00148518	0.0477535	910.748	639.139	682.028	1988.81	1009.48	1525.76	1138.7
ENSMUSG00000061972.3	Olfr99	22.9236	7.76898	2.44668	3.17532	0.00149672	0.0480251	0	0	0	0	45.161	99.5953	11.3664
ENSMUSG00000049044.16	Rapgef4	458.583	1.50465	0.474145	3.1734	0.00150666	0.0482441	314.121	188.946	151.457	1113.61	362.173	548.287	452.588
ENSMUSG00000037997.12	Parp11	1261.12	1.01661	0.320537	3.17159	0.00151607	0.0484284	530.335	884.961	911.565	2161.9	1684.24	1425.14	1005.41
ENSMUSG00000048478.7	Spata33	36.2709	4.35971	1.37483	3.1711	0.00151865	0.0484284	0	8.67609	0	32.657	62.8712	84.194	58.8984
ENSMUSG00000025451.15	Paip1	426.655	0.884396	0.279199	3.16762	0.00153691	0.0488537	267.207	328.727	244.589	408.213	451.61	573.956	636.516
ENSMUSG00000068749.9	Psma5	1946.12	0.526247	0.166147	3.16736	0.00153828	0.0488537	1665.45	1530.85	1350.88	1973.3	2358.11	2456	1940.55
ENSMUSG00000068246.5	Apol9b	33.6143	4.42256	1.39885	3.16156	0.00156927	0.0497364	0	7.71208	0	74.2948	49.5885	72.8996	24.7993
ENSMUSG00000024600.8	Slc27a6	223.766	-1.40462	0.444471	-3.16021	0.00157655	0.0497638	335.539	271.851	408.276	74.2948	177.102	92.408	167.395
ENSMUSG00000101588.1	Gm28265	12.7303	-7.39405	2.33958	-3.16042	0.00157543	0.0497638	17.3379	2.89203	66.7917	0	0	0	0
ENSMUSG00000003269.17	Cyth2	546.107	1.04461	0.330727	3.15853	0.00158566	0.0499499	331.459	363.432	298.211	456.382	540.161	979.525	756.379
