# Supplementary material for: Cell circuits between leukemic cells and mesenchymal stem cells block lymphopoiesis by activating lymphotoxin beta receptor signaling
Source: eLife. 2023 Mar 13;12:e83533. doi: 10.7554/eLife.83533 (PMC10042536; doi:10.7554/eLife.83533)
Supplement: Supplementary file 2. — Differentially expressed genes analyzed by bulk RNA-sequencing of Lepr+ MSPCs isolated from ALL transplanted wild-type mice treated with control or LTβR-Ig (100 µg/mouse/week) for 2 weeks. Related to Figure 3. [file elife-83533-supp2.xlsx]

## Sheet: Sheet1
gene_id	mgi_symbol	baseMean	log2FoldChange	lfcSE	stat	pvalue	padj	Hel-Ig 1	Hel-Ig 2	Hel-Ig 3	Hel-Ig 4	LTbR-Ig 1	LTbR-Ig 2	LTbR-Ig 3
ENSMUSG00000024164.15	C3	9712.79	-2.85206	0.176877	-16.1245	1.72e-58	2.61e-54	15668.8	14192.9	14791.4	16602.1	1624.12	2133.22	2607.91
ENSMUSG00000033066.15	Gas7	807.66	-2.58668	0.180754	-14.3105	1.88e-46	1.43e-42	1392.01	1317.64	1148.94	1139.74	211.633	199.347	213.728
ENSMUSG00000091938.2	Gm2564	625.172	-2.11329	0.206925	-10.2129	1.74e-24	8.82e-21	802.547	979.374	859.394	1068.44	204.93	208.595	229.919
ENSMUSG00000071005.7	Ccl19	3095.57	-2.26345	0.228224	-9.91768	3.49e-23	1.33e-19	4031.51	4702.06	6126.65	3769.5	905.905	818.966	1188.45
ENSMUSG00000001493.9	Meox1	1246.04	-3.51837	0.37751	-9.31993	1.16e-20	3.55e-17	2472.95	2190.75	2076.1	1399.1	110.126	126.39	296.844
ENSMUSG00000021759.14	Plpp1	2252.93	-1.28788	0.141826	-9.08069	1.08e-19	2.74e-16	2675.43	3207.32	3264.06	2849.86	1139.56	1266.98	1281.29
ENSMUSG00000094162.1	Ccl19-ps3	519.606	-2.17001	0.244494	-8.87552	6.96e-19	1.52e-15	631.097	831.494	722.836	915.508	151.303	172.63	193.218
ENSMUSG00000032000.17	Birc3	2157.24	-1.36646	0.154279	-8.85705	8.22e-19	1.57e-15	3015.06	2534.33	3101.83	2981.09	1118.5	1001.87	1266.17
ENSMUSG00000022425.15	Enpp2	8377.82	-1.71002	0.199386	-8.5764	9.79e-18	1.66e-14	13640.8	10888.2	13523.4	9378.28	4503.67	3213.18	3172.45
ENSMUSG00000031538.6	Plat	374.769	-2.85187	0.358135	-7.96311	1.68e-15	2.56e-12	546.189	787.218	655.07	374.056	76.6093	68.8466	100.387
ENSMUSG00000051379.12	Flrt3	100.216	-9.86043	1.33165	-7.4047	1.31e-13	1.82e-10	126.546	117.773	265.93	187.028	0	0	0
ENSMUSG00000029830.15	Svopl	82.0132	-9.57261	1.33136	-7.1901	6.47e-13	8.22e-10	209.005	130.17	127.318	104.364	0	0	0
ENSMUSG00000001021.12	S100a3	106.391	-9.94668	1.38724	-7.17013	7.49e-13	8.78e-10	66.1305	159.392	281.331	233.527	0	0	0
ENSMUSG00000025930.6	Msc	1060.17	-2.04782	0.286948	-7.13657	9.57e-13	1.01e-09	1308.73	1678.93	1759.86	1498.29	229.828	443.906	459.838
ENSMUSG00000064345.1	mt-Nd2	7692.42	0.835178	0.117114	7.13136	9.94e-13	1.01e-09	6334.65	5551.26	5160.47	5858.84	10914	10191.3	9569.17
ENSMUSG00000031465.6	Angpt2	4304.28	-1.29244	0.184365	-7.01021	2.38e-12	2.27e-09	5972.97	5258.16	5752.91	5955.97	2291.58	2931.63	1805.89
ENSMUSG00000107705.1	Gm45062	328.745	-25.4523	3.67822	-6.91972	4.53e-12	4.06e-09	0	1284.87	1001.09	0	0	0	0
ENSMUSG00000064368.1	mt-Nd6	3387.06	0.909193	0.133057	6.8331	8.31e-12	7.04e-09	2581.54	2474.11	2301.99	2432.4	5210.39	4055.78	4536.85
ENSMUSG00000037071.2	Scd1	1177	2.0667	0.305843	6.75741	1.4e-11	1.13e-08	729.885	466.664	332.669	448.454	1708.39	2592.54	1918.15
ENSMUSG00000090523.2	Gypc	5837.69	-0.906229	0.13712	-6.60901	3.87e-11	2.95e-08	7977.3	7753.52	7071.27	6219.46	4242.24	3735.18	3648.48
ENSMUSG00000016918.15	Sulf1	6796.89	-0.893234	0.137069	-6.51669	7.19e-11	5.22e-08	9094.99	8581.47	8112.39	7916.15	5057.17	3826.64	4739.79
ENSMUSG00000064363.1	mt-Nd4	12783.5	0.832271	0.128698	6.46686	1e-10	6.93e-08	9197.04	10222.3	8614.48	10077.8	19147.5	16767.7	15021.4
ENSMUSG00000018570.17	2810408A11Rik	58.0075	-9.07247	1.41446	-6.41407	1.42e-10	9.39e-08	137.976	62.8712	138.612	64.0649	0	0	0
ENSMUSG00000020123.6	Avpr1a	804.774	-1.90611	0.299069	-6.37349	1.85e-10	1.17e-07	998.489	1222	1224.92	1222.4	184.82	395.611	354.054
ENSMUSG00000022878.5	Adipoq	19019.3	1.09569	0.17371	6.30758	2.83e-10	1.66e-07	12875	10202.8	11532.5	16269.4	25597.1	27121.4	28866.2
ENSMUSG00000038521.17	C1s1	16506.4	-0.843227	0.13357	-6.31299	2.74e-10	1.66e-07	23411	18872	19095.6	19653.5	9976.45	11874.5	12043.2
ENSMUSG00000069910.2	Spdl1	50.0718	-8.8608	1.41015	-6.28357	3.31e-10	1.87e-07	96.3383	126.628	58.5251	67.1648	0	0	0
ENSMUSG00000046879.7	Irgm1	12438.2	0.627912	0.100147	6.26991	3.61e-10	1.97e-07	10313.1	9358.95	10754.2	9674.84	15987.4	14641.7	15890.3
ENSMUSG00000017493.12	Igfbp4	21150.5	0.761295	0.122267	6.22651	4.77e-10	2.51e-07	16141.6	17998	13754.4	16944.1	26296.1	27918.8	28252
ENSMUSG00000095298.2	Gm12407	412.943	-1.90602	0.308223	-6.18391	6.25e-10	3.18e-07	510.266	697.782	588.331	599.317	172.371	201.402	105.784
ENSMUSG00000112160.1	BC024063	77.4615	-6.58557	1.08042	-6.09536	1.09e-09	5.37e-07	223.701	93.864	90.3545	127.097	0	0	4.31773
ENSMUSG00000064337.1	mt-Rnr1	3078	1.07411	0.177933	6.03657	1.57e-09	7.5e-07	2094.95	1985.31	1971.37	2257.77	5255.4	4472.97	3405.61
ENSMUSG00000040249.15	Lrp1	4270.07	1.00725	0.167672	6.00729	1.89e-09	8.71e-07	3423.27	2621.11	2608.99	3202.21	5586.73	6889.79	5406.88
ENSMUSG00000034413.14	Neurl1b	42.3477	-8.61941	1.47666	-5.83709	5.31e-09	2.38e-06	117.565	81.4669	57.4983	38.2323	0	0	0
ENSMUSG00000049038.3	Mterf2	247.062	-1.94121	0.332966	-5.83004	5.54e-09	2.41e-06	317.59	474.633	328.562	318.258	110.126	73.9844	97.1489
ENSMUSG00000064367.1	mt-Nd5	10680.4	0.817717	0.140474	5.82114	5.84e-09	2.47e-06	8570.84	8095.33	7326.93	8029.81	16505.5	12004	13866.4
ENSMUSG00000079363.7	Gbp4	3974.79	1.16749	0.203603	5.73414	9.8e-09	4.04e-06	3347.35	2141.16	2409.8	2407.6	6931.23	5316.6	5135.94
ENSMUSG00000031554.18	Adam5	45.0699	-8.70912	1.53987	-5.65576	1.55e-08	6.13e-06	106.135	122.2	22.5886	63.0316	0	0	0
ENSMUSG00000062515.3	Fabp4	243.554	2.05407	0.363303	5.65389	1.57e-08	6.13e-06	111.85	85.0089	110.89	104.364	557.333	275.386	452.282
ENSMUSG00000109904.1	Gm45819	29.6792	8.64432	1.54352	5.60039	2.14e-08	8.15e-06	0	0	0	0	93.8464	48.2953	64.7659
ENSMUSG00000055172.10	C1ra	8588.88	-0.661425	0.120566	-5.48599	4.11e-08	1.53e-05	11487.1	10254.2	9889.71	8923.62	6320.27	6506.51	6420.46
ENSMUSG00000027797.15	Dclk1	1813.26	-1.87074	0.34742	-5.38466	7.26e-08	2.63e-05	3090.99	2347.49	2430.33	2606	396.453	1178.61	573.178
ENSMUSG00000020388.12	Pdlim4	1487.49	-1.25314	0.233133	-5.37523	7.65e-08	2.66e-05	1994.53	2398.85	1849.19	1633.66	695.229	1062.5	722.14
ENSMUSG00000021025.8	Nfkbia	6940.09	-0.936919	0.174327	-5.3745	7.68e-08	2.66e-05	9953.05	8693.93	7509.69	8560.93	5554.17	4297.26	3763.98
ENSMUSG00000042097.17	Zfp239	45.0532	-8.70881	1.62281	-5.36651	8.03e-08	2.72e-05	157.57	97.4061	41.0702	17.5662	0	0	0
ENSMUSG00000000861.15	Bcl11a	32.5027	8.77498	1.649	5.32139	1.03e-07	3.4e-05	0	0	0	0	22.0252	126.39	77.7191
ENSMUSG00000010307.7	Tmem86a	1284.69	-1.59676	0.300259	-5.31794	1.05e-07	3.4e-05	2119.44	1705.49	1636.65	1704.95	544.884	866.233	367.007
ENSMUSG00000015340.10	Cybb	7887.3	-0.921411	0.173703	-5.30451	1.13e-07	3.51e-05	10903.4	9741.49	9986.22	8695.26	4262.35	4905.57	6413.99
ENSMUSG00000073599.9	Ecscr	392.597	-1.76254	0.332221	-5.30532	1.12e-07	3.51e-05	545.373	721.69	545.207	425.722	185.778	112.004	197.536
ENSMUSG00000006356.10	Crip2	2575.06	-0.704194	0.13409	-5.25164	1.51e-07	4.51e-05	3375.11	3097.51	3147.01	2653.53	1856.82	1922.57	1876.05
ENSMUSG00000032475.15	Nck1	2953.13	-1.06799	0.203365	-5.25161	1.51e-07	4.51e-05	3655.14	3664.24	4296.97	3521.5	1407.7	1691.36	2319.7
ENSMUSG00000037824.6	Tspan14	715.192	1.05198	0.200524	5.24615	1.55e-07	4.55e-05	496.387	390.51	515.431	546.618	949.955	1057.36	1024.38
ENSMUSG00000033544.6	Angptl1	1461.69	-1.62137	0.30977	-5.23411	1.66e-07	4.77e-05	2478.67	1802.9	1549.37	2352.84	916.439	404.859	675.725
ENSMUSG00000029570.5	Lfng	415.161	1.32971	0.254527	5.22426	1.75e-07	4.93e-05	213.087	324.097	225.886	238.693	662.67	639.143	588.291
ENSMUSG00000082902.3	Ccl19-ps1	246.284	-2.63407	0.507016	-5.19524	2.04e-07	5.67e-05	282.483	363.059	429.184	454.654	25.8556	54.4607	104.705
ENSMUSG00000052727.6	Map1b	6090.1	1.11842	0.215696	5.18515	2.16e-07	5.87e-05	4721.39	3279.04	3220.93	4913.37	7275.01	8660.28	10341
ENSMUSG00000024610.14	Cd74	1792.06	2.10493	0.407374	5.16706	2.38e-07	6.36e-05	583.745	1038.7	668.418	661.315	5695.9	1918.46	1931.1
ENSMUSG00000034173.13	Zbed5	52.2662	-4.31749	0.848008	-5.09133	3.56e-07	9.18e-05	136.343	69.0697	109.863	35.1324	5.7457	2.05512	5.39716
ENSMUSG00000101111.1	Gm28437	228.064	1.48844	0.292323	5.09175	3.55e-07	9.18e-05	134.71	121.315	117.05	138.463	437.631	305.185	334.624
ENSMUSG00000039699.13	Batf2	489.127	1.34735	0.266158	5.06223	4.14e-07	0.000105253	373.923	296.646	215.619	284.159	769.923	665.859	800.939
ENSMUSG00000001870.15	Ltbp1	18505.9	-0.67691	0.13399	-5.05196	4.37e-07	0.000109255	26014.6	20143.6	22019.8	19501.6	14213.9	13864.9	13093.5
ENSMUSG00000022306.8	Zfpm2	34.0817	-8.30519	1.64622	-5.04502	4.53e-07	0.000110576	97.9711	11.5116	56.4716	71.2981	0	0	0
ENSMUSG00000027353.14	Mcm8	47.129	-8.77351	1.73957	-5.04349	4.57e-07	0.000110576	108.585	187.728	13.3478	18.5995	0	0	0
ENSMUSG00000025574.13	Tk1	214.159	-1.91804	0.380828	-5.0365	4.74e-07	0.000112901	397.599	281.592	327.535	236.627	56.4994	92.4804	98.2283
ENSMUSG00000109498.1	Gm45222	34.3166	-8.31519	1.65563	-5.02238	5.1e-07	0.00011966	47.3527	94.7495	85.2207	11.3664	0	0	0
ENSMUSG00000074852.3	Hpse2	32.0236	-8.21396	1.64071	-5.00634	5.55e-07	0.000128098	16.3285	34.5349	102.675	69.2314	0	0	0
ENSMUSG00000020697.16	Lig3	209.092	-1.98496	0.396923	-5.00087	5.71e-07	0.00012982	297.179	370.143	264.903	291.392	45.008	99.6734	87.434
ENSMUSG00000112824.1	Gm47917	28.9065	-8.06705	1.61634	-4.99093	6.01e-07	0.000134672	57.9663	18.5957	36.9632	87.8309	0	0	0
ENSMUSG00000002289.15	Angptl4	2694.52	1.13408	0.22831	4.96728	6.79e-07	0.000149967	1467.93	2216.43	1555.53	1850.65	4912.57	3746.49	3024.57
ENSMUSG00000005131.4	4930550C14Rik	45.0215	-8.70591	1.75488	-4.96098	7.01e-07	0.000152703	43.2706	5.31306	112.943	151.896	0	0	0
ENSMUSG00000031451.6	Gas6	32978.2	0.953043	0.193297	4.93047	8.2e-07	0.000176078	25253.7	25714.3	15624.1	27077.8	46311.3	44447.1	45296.2
ENSMUSG00000107061.1	Gm19590	24.5098	8.36766	1.70182	4.9169	8.79e-07	0.000182997	0	0	0	0	37.347	32.8819	100.387
ENSMUSG00000003923.14	Tfam	720.337	-1.43364	0.291697	-4.91484	8.89e-07	0.000182997	1131.57	1162.67	875.822	754.313	274.836	479.871	335.703
ENSMUSG00000030247.9	Kcnj8	30.3993	-8.14141	1.65506	-4.9191	8.69e-07	0.000182997	116.749	37.1914	37.99	19.6328	0	0	0
ENSMUSG00000033576.11	Apol6	979.391	1.55186	0.317786	4.88335	1.04e-06	0.00021194	374.74	581.78	753.639	420.555	2050.26	1308.08	1334.18
ENSMUSG00000085594.1	Gm11551	23.3424	-7.75814	1.58983	-4.87985	1.06e-06	0.000212894	24.4928	38.0769	60.5786	39.2656	0	0	0
ENSMUSG00000074896.3	Ifit3	6966.84	1.04997	0.215614	4.86969	1.12e-06	0.00021948	5108.38	5646.9	3873.95	4370.88	10999.2	7037.76	11492.7
ENSMUSG00000078349.2	AW011738	285.517	-2.07464	0.426117	-4.8687	1.12e-06	0.00021948	435.971	626.055	401.461	223.194	86.1855	90.4253	124.135
ENSMUSG00000022018.7	Rgcc	5442.12	1.11199	0.228892	4.85815	1.18e-06	0.000228575	3623.3	3344.57	3293.83	4195.22	10924.5	5968.07	6573.74
ENSMUSG00000030707.15	Coro1a	139.192	-1.90714	0.392822	-4.85497	1.2e-06	0.000229366	218.802	248.828	195.084	144.663	54.5841	60.6261	46.4156
ENSMUSG00000032572.9	Col6a4	88.8808	-9.68781	2.00459	-4.83281	1.35e-06	0.000251881	0	272.737	212.538	133.296	0	0	0
ENSMUSG00000064339.1	mt-Rnr2	26747.6	0.641339	0.132742	4.83147	1.36e-06	0.000251881	22351.3	22016.4	22703.6	18729.7	36860.6	34756.2	28868.3
ENSMUSG00000060992.8	Copz1	2322.05	0.648167	0.134844	4.8068	1.53e-06	0.0002816	1676.94	1843.63	1993.96	1916.78	2957.12	3136.11	2646.77
ENSMUSG00000027831.9	Veph1	30.9701	7.25531	1.51749	4.78113	1.74e-06	0.000316255	0	1.77102	0	0	63.2027	114.059	36.7007
ENSMUSG00000087109.1	4930474H06Rik	221.606	3.02077	0.634467	4.76112	1.93e-06	0.000345187	24.4928	64.6422	60.5786	68.1981	135.982	755.257	432.852
ENSMUSG00000044813.15	Shb	34.635	-8.32909	1.7582	-4.73729	2.17e-06	0.000383822	142.875	16.8247	67.7659	13.433	0	0	0
ENSMUSG00000023960.13	Enpp5	5067.28	0.783782	0.165732	4.72921	2.25e-06	0.000394831	4200.51	3467.66	3137.76	4594.07	6643.94	6294.84	6955.86
ENSMUSG00000028270.12	Gbp2	27243.6	0.891947	0.189961	4.69541	2.66e-06	0.000460786	21062.2	21018.5	21972.6	15220.6	44942.8	29728.4	35817.7
ENSMUSG00000086968.8	4933431E20Rik	125.112	-4.07431	0.869046	-4.68825	2.76e-06	0.000471834	177.165	286.02	193.03	177.728	22.0252	0	15.112
ENSMUSG00000078921.3	Tgtp2	18081.7	0.453704	0.0971586	4.66972	3.02e-06	0.000504703	15489.2	14432	16423	15746.5	22724.2	21003.3	20108.7
ENSMUSG00000024081.8	Cebpz	784.418	-1.09497	0.234587	-4.66764	3.05e-06	0.000504703	936.441	1028.08	1154.07	922.742	569.782	495.284	355.133
ENSMUSG00000042444.10	Mindy2	891.663	0.954578	0.204497	4.66794	3.04e-06	0.000504703	581.295	508.283	712.568	728.48	1265.01	1265.95	1148.52
ENSMUSG00000020108.4	Ddit4	329.397	-1.94253	0.416704	-4.66165	3.14e-06	0.000514049	604.972	320.554	520.565	472.22	92.8888	194.209	87.434
ENSMUSG00000054863.8	Tafa5	20.4338	8.10552	1.74097	4.65576	3.23e-06	0.00052334	0	0	0	0	49.796	26.7166	65.8454
ENSMUSG00000012428.9	Steap4	19874.7	-0.385832	0.0835968	-4.61539	3.92e-06	0.000629434	21212.4	23427.9	21317.5	21945.3	16427.9	16812.9	17250.4
ENSMUSG00000000686.11	Abhd15	1220.39	1.42987	0.310925	4.59876	4.25e-06	0.000674722	378.822	881.082	768.013	785.312	1921.94	2197.95	1567.34
ENSMUSG00000031079.12	Zfp300	76.3683	-9.46893	2.0633	-4.58921	4.45e-06	0.000696426	177.164	0	58.5251	296.559	0	0	0
ENSMUSG00000037295.7	Ldlrap1	1193.93	0.792686	0.172779	4.58785	4.48e-06	0.000696426	797.648	1039.59	922.026	855.577	1476.64	1736.58	1486.38
ENSMUSG00000027832.5	Ptx3	2260.97	1.0515	0.229358	4.58452	4.55e-06	0.000700481	1039.31	1749.77	1587.36	1786.58	3489.55	3395.06	2701.82
ENSMUSG00000061878.15	Sphk1	3015.94	-1.09221	0.238386	-4.58167	4.61e-06	0.00070299	4921.42	3548.24	3581.32	3480.17	2390.21	1325.55	1755.16
ENSMUSG00000076617.9	Ighm	152.276	11.0033	2.40834	4.56883	4.9e-06	0.000740041	0	0	0	0	971.981	69.8741	22.6681
ENSMUSG00000071648.3	Rom1	198.934	2.31586	0.507355	4.56457	5.01e-06	0.000747825	67.7634	41.6189	82.1404	101.264	342.827	199.347	550.51
ENSMUSG00000024810.16	Il33	401.659	-3.22423	0.707702	-4.55591	5.22e-06	0.000771744	242.479	911.189	621.187	814.244	11.4914	133.583	62.6071
ENSMUSG00000064351.1	mt-Co1	27141.9	0.764576	0.168285	4.54333	5.54e-06	0.00081142	19029.3	24122.2	18419	21527.9	41868.9	35676.9	28436.6
ENSMUSG00000064341.1	mt-Nd1	18187.8	0.599528	0.132956	4.50923	6.51e-06	0.000944342	14242.6	17093.9	14314	13613.8	25318.4	21525.3	20572.9
ENSMUSG00000020334.6	Slc22a4	208.32	-1.48601	0.333662	-4.45365	8.44e-06	0.00121379	322.488	243.515	356.284	221.127	105.338	98.6458	102.546
ENSMUSG00000113326.1	Gm47586	69.846	-2.89564	0.651109	-4.44724	8.7e-06	0.00123884	93.889	115.116	52.3645	180.828	18.1947	13.3583	12.9532
ENSMUSG00000023078.6	Cxcl13	282.723	-3.50483	0.788547	-4.44466	8.8e-06	0.0012422	412.295	266.538	1055.5	108.497	52.6689	58.5709	10.7943
ENSMUSG00000005553.14	Atp4a	26.3293	-7.9325	1.7908	-4.42958	9.44e-06	0.00132008	10.6135	84.1234	73.9264	14.4663	0	0	0
ENSMUSG00000029231.15	Pdgfra	12072	-0.574263	0.130021	-4.41669	1e-05	0.00137606	15738.2	15102.4	12241	12807.8	9023.62	9495.69	9652.28
ENSMUSG00000039982.7	Dtx4	1028.53	-0.908621	0.205681	-4.41762	9.98e-06	0.00137606	1082.58	1229.09	1471.34	1332.96	791.949	569.269	684.36
ENSMUSG00000026307.12	Scly	898.885	-1.49288	0.338374	-4.41193	1.02e-05	0.00139412	1698.17	666.789	1272.15	1303	347.615	463.43	506.254
ENSMUSG00000021186.9	Fbln5	34131.4	0.599484	0.136052	4.40629	1.05e-05	0.00141818	26460.4	27053.2	24709.9	33019.3	38915.6	41710.7	45833.8
ENSMUSG00000098470.1	C1rb	609.064	-0.820572	0.18711	-4.38551	1.16e-05	0.00154695	772.339	741.172	674.578	788.412	419.436	467.54	377.801
ENSMUSG00000017754.13	Pltp	1935.64	1.27685	0.292374	4.36717	1.26e-05	0.00165362	1418.13	1447.81	648.909	1269.93	3370.81	2868.95	2462.18
ENSMUSG00000037235.13	Mxd4	3006.01	0.763001	0.174683	4.36792	1.25e-05	0.00165362	2205.17	2213.77	1973.42	2817.82	3611.17	4458.58	3656.04
ENSMUSG00000026303.6	Mlph	146.457	-3.97886	0.913004	-4.35799	1.31e-05	0.00170977	373.923	277.165	180.709	141.563	27.7709	18.4961	0
ENSMUSG00000038943.16	Prc1	70.2527	-9.34829	2.14641	-4.35532	1.33e-05	0.00171611	0	71.7263	372.712	43.3988	0	0	0
ENSMUSG00000041828.15	Abca8a	3390.54	-0.941782	0.216391	-4.35221	1.35e-05	0.00172595	5271.66	4168.98	2895.45	4644.71	2305.94	2026.35	2301.35
ENSMUSG00000106739.1	Gm43499	21.0641	-7.61071	1.75061	-4.34746	1.38e-05	0.00174904	52.2513	8.8551	55.4448	29.9658	0	0	0
ENSMUSG00000031304.18	Il2rg	1446.33	-1.56602	0.360432	-4.34486	1.39e-05	0.00175532	1920.23	2442.24	2060.7	1609.89	1144.35	436.713	457.679
ENSMUSG00000059897.5	Zfp930	192.551	-1.36747	0.316282	-4.32357	1.54e-05	0.00191778	267.788	212.522	279.277	278.992	112.999	82.2048	106.864
ENSMUSG00000028826.14	Maco1	518.737	1.04303	0.241446	4.31991	1.56e-05	0.00193403	320.855	301.073	398.381	398.856	711.509	856.985	624.991
ENSMUSG00000006310.10	Zbtb32	21.6138	-7.64799	1.77369	-4.31191	1.62e-05	0.00198919	15.5121	69.0697	12.3211	53.7319	0	0	0
ENSMUSG00000022391.15	Rangap1	225.661	-1.57876	0.366601	-4.30648	1.66e-05	0.00202236	355.962	324.982	303.92	270.726	132.151	64.7363	118.738
ENSMUSG00000030208.15	Emp1	6774.78	0.813441	0.190763	4.26415	2.01e-05	0.00242706	3732.7	6008.18	4821.64	5787.54	9020.74	9746.41	8069.83
ENSMUSG00000109134.1	Gm45076	17.3428	-7.33106	1.72149	-4.25855	2.06e-05	0.00246912	27.7585	48.703	29.7759	14.4663	0	0	0
ENSMUSG00000103662.1	Gm34294	39.3592	-5.27178	1.23853	-4.25647	2.08e-05	0.00247273	151.039	17.7102	37.99	61.9983	0	2.05512	3.2383
ENSMUSG00000025225.14	Nfkb2	501.183	-1.66798	0.392807	-4.24631	2.17e-05	0.00256735	916.03	874.883	610.92	420.555	233.658	292.855	140.326
ENSMUSG00000029298.15	Gbp9	737.038	1.10733	0.261204	4.23932	2.24e-05	0.00262825	447.401	677.415	456.906	379.223	954.743	1116.96	1099.94
ENSMUSG00000089797.1	Gm16118	731.954	-0.908361	0.215057	-4.22382	2.4e-05	0.00279429	906.233	819.982	984.659	929.975	600.425	414.107	441.488
ENSMUSG00000021508.11	Cxcl14	35036.2	0.600062	0.142212	4.21948	2.45e-05	0.00282716	32052.9	30893.7	26052.9	25141.3	37937.9	46856.8	45033.9
ENSMUSG00000031928.15	Mre11a	214.004	-1.95432	0.465793	-4.1957	2.72e-05	0.00311716	445.769	240.859	346.017	214.927	82.355	47.2678	112.261
ENSMUSG00000065947.3	mt-Nd4l	51.1476	2.64172	0.63143	4.18371	2.87e-05	0.00326164	14.6957	15.0537	14.3746	18.5995	97.6769	54.4607	141.406
ENSMUSG00000022361.14	Zhx1	1103.92	-0.994087	0.238288	-4.17178	3.02e-05	0.00341182	1714.49	1036.05	1451.83	1379.46	700.017	587.765	816.051
ENSMUSG00000019261.3	Map1s	182.918	1.61047	0.386603	4.16571	3.1e-05	0.0034782	111.034	69.0697	102.676	104.364	385.919	286.689	214.807
ENSMUSG00000046351.11	Zfp322a	774.199	-0.995156	0.24004	-4.14579	3.39e-05	0.00376709	1193.61	822.638	927.16	972.34	495.088	392.528	587.211
ENSMUSG00000073421.5	H2-Ab1	935.205	1.63124	0.393695	4.14342	3.42e-05	0.00377873	469.445	414.418	524.672	550.752	2646.85	1059.41	854.91
ENSMUSG00000037709.13	Fam13a	2001.65	-1.33606	0.322908	-4.13758	3.51e-05	0.00384824	2572.56	1983.54	2798.94	3389.24	1642.31	685.383	868.943
ENSMUSG00000005980.15	Dnase1	34.3548	-6.42627	1.55458	-4.13376	3.57e-05	0.0038848	129.812	30.9928	69.8194	6.19983	0	1.02756	1.07943
ENSMUSG00000041696.14	Rasl12	288.12	-2.41141	0.585214	-4.12056	3.78e-05	0.00408509	447.401	584.436	510.297	214.927	101.507	24.6615	121.976
ENSMUSG00000030317.8	Timp4	409.627	1.40103	0.340392	4.11593	3.86e-05	0.00409932	189.411	283.363	323.428	160.162	742.153	563.103	591.529
ENSMUSG00000055653.13	Gpc3	64.7656	-3.95708	0.961597	-4.11511	3.87e-05	0.00409932	107.768	77.0393	148.88	96.0974	5.7457	0	15.1121
ENSMUSG00000068036.14	Afdn	594.619	1.33808	0.32518	4.11491	3.87e-05	0.00409932	386.986	348.005	346.017	348.224	819.719	1326.58	565.622
ENSMUSG00000071984.10	Fndc1	328.9	1.58386	0.386101	4.1022	4.09e-05	0.00430116	225.334	110.689	166.334	202.528	456.783	731.623	397.231
ENSMUSG00000103039.1	Gm37123	19.4412	-7.49671	1.8289	-4.09902	4.15e-05	0.00433084	82.459	16.8247	12.3211	23.766	0	0	0
ENSMUSG00000023150.14	Ivns1abp	1572.96	-0.617974	0.150835	-4.09701	4.19e-05	0.00433894	2014.12	1808.21	1905.66	1626.42	1224.79	1279.31	1093.46
ENSMUSG00000036764.12	Dnajc12	121.549	-1.62779	0.397713	-4.09288	4.26e-05	0.00438712	160.02	170.903	176.602	173.595	69.906	57.5434	37.7801
ENSMUSG00000005054.7	Cstb	1700.12	-0.584434	0.144077	-4.0564	4.98e-05	0.0050972	2111.28	1801.13	2069.94	1906.45	1422.06	1340.97	1186.3
ENSMUSG00000053886.4	Sh2d4a	357.74	-1.75641	0.433602	-4.05074	5.11e-05	0.00518723	468.629	421.503	506.19	641.683	104.38	92.4804	255.825
ENSMUSG00000071267.11	Zfp942	500.81	-0.814497	0.201235	-4.0475	5.18e-05	0.00522467	672.735	552.558	614	604.484	319.844	384.308	338.942
ENSMUSG00000078853.8	Igtp	15950	0.594557	0.146994	4.04478	5.24e-05	0.00525106	14514.4	13116.2	13931	10494.2	21354.8	18158	19508.6
ENSMUSG00000089961.1	Gm16567	849.347	-0.957516	0.236901	-4.04185	5.3e-05	0.00528233	1171.57	938.64	841.939	1314.36	510.409	505.56	632.547
ENSMUSG00000006651.8	Aplp1	18.1857	-7.39828	1.8323	-4.03769	5.4e-05	0.00534192	31.0242	14.1682	69.8194	11.3664	0	0	0
ENSMUSG00000032740.16	Ccdc88a	2853.36	-0.97737	0.242195	-4.03547	5.45e-05	0.00535788	4161.32	3206.43	3405.75	3610.37	1663.38	1299.86	2519.39
ENSMUSG00000080731.1	Rps2-ps9	14.5968	-7.08129	1.75781	-4.02848	5.61e-05	0.00548443	28.5749	13.2826	26.6956	33.0658	0	0	0
ENSMUSG00000006585.3	Cdt1	76.8795	-4.85793	1.2134	-4.00357	6.24e-05	0.00605654	173.899	133.712	140.665	73.3647	13.4066	0	0
ENSMUSG00000097804.1	Gm16685	1042.98	-1.15823	0.290293	-3.98986	6.61e-05	0.00637683	1988	1119.28	1311.17	1014.71	638.73	690.521	498.698
ENSMUSG00000056515.8	Rab31	1814.71	0.808793	0.203144	3.98137	6.85e-05	0.0065674	1206.68	1332.69	1334.78	1587.16	3009.79	2188.7	1982.92
ENSMUSG00000064357.1	mt-Atp6	327.355	1.06671	0.268345	3.97515	7.03e-05	0.00669946	182.879	224.919	265.93	212.861	521.901	397.666	473.871
ENSMUSG00000040287.9	Stac3	15.8617	-7.20042	1.81375	-3.96991	7.19e-05	0.00680581	16.3285	16.8247	18.4816	58.8984	0	0	0
ENSMUSG00000036661.13	Dennd3	41.3924	-8.58597	2.17133	-3.95424	7.68e-05	0.00717961	180.43	65.5277	0	42.3655	0	0	0
ENSMUSG00000103940.1	Gm38227	20.3442	-7.56191	1.91308	-3.95274	7.73e-05	0.00717961	86.5412	15.9392	5.13378	34.0991	0	0	0
ENSMUSG00000108181.1	C030015A19Rik	32.4329	-6.32466	1.59988	-3.95322	7.71e-05	0.00717961	146.14	23.9088	15.4013	38.2323	0	0	2.15886
ENSMUSG00000090659.9	Zfp493	25.3791	-7.879	1.99676	-3.9459	7.95e-05	0.00734287	0.816426	52.2451	72.8996	50.632	0	0	0
ENSMUSG00000023947.7	Nfkbie	2348.76	-1.0736	0.272373	-3.94167	8.09e-05	0.00738434	4022.53	3636.79	2265.02	2130.68	1224.79	1424.2	1649.37
ENSMUSG00000041515.9	Irf8	1162.34	-0.805412	0.204327	-3.94178	8.09e-05	0.00738434	1374.05	1686.01	1520.62	1079.8	831.211	794.304	806.336
ENSMUSG00000024556.3	Me2	1432.09	1.11667	0.283478	3.93919	8.18e-05	0.00741652	587.01	1276.02	1076.04	856.61	1918.11	1893.79	2365.04
ENSMUSG00000040329.14	Il7	2464.22	0.683726	0.173661	3.93713	8.25e-05	0.00743633	1780.63	1927.75	1994.99	2077.98	2824.01	3838.97	2715.85
ENSMUSG00000022512.2	Cldn1	1765.13	-1.15859	0.294454	-3.93469	8.33e-05	0.0074681	1919.42	1665.64	3655.25	1950.88	1056.25	957.686	1078.35
ENSMUSG00000045005.9	Fzd5	1763.52	0.865844	0.220359	3.92923	8.52e-05	0.00759475	1200.15	978.488	1270.1	1740.09	2440.96	2368.53	2285.16
ENSMUSG00000050234.7	Gja4	189.615	-1.59935	0.407255	-3.92714	8.6e-05	0.00761668	233.498	348.891	304.946	170.495	108.211	72.9568	80.9574
ENSMUSG00000016024.9	Lbp	7646.43	0.544905	0.138803	3.92574	8.65e-05	0.00761672	6986.16	5762.01	6259.1	6409.59	8171.34	9042.53	10613
ENSMUSG00000040118.15	Cacna2d1	1279.17	-0.963751	0.246159	-3.91515	9.03e-05	0.00791315	1956.16	1525.73	1528.84	1419.76	587.019	867.261	1020.06
ENSMUSG00000029095.17	Ablim2	146.371	2.53482	0.649631	3.90193	9.54e-05	0.00831035	63.6812	37.1914	16.4281	73.3647	286.327	132.555	410.184
ENSMUSG00000027514.14	Zbp1	2713.35	0.788077	0.202461	3.89248	9.92e-05	0.0085919	2428.87	2292.58	1994.99	1511.73	4015.28	3268.67	3386.18
ENSMUSG00000057367.12	Birc2	1253.81	-0.958062	0.246316	-3.88957	0.000100422	0.00864655	1567.54	1339.78	1762.94	1626.42	796.737	1057.36	578.576
ENSMUSG00000077450.12	Rab11b	3913.81	0.361654	0.0930446	3.88689	0.000101536	0.00869331	3446.95	3528.76	3487.89	3410.94	4597.52	4218.14	4566
ENSMUSG00000022676.6	Snai2	14332.6	-0.794194	0.204738	-3.87908	0.000104851	0.00892694	17003.7	15190	20082.3	17361.6	7006.88	11446	11676.2
ENSMUSG00000027639.16	Samhd1	11804.8	0.469314	0.121241	3.87092	0.000108425	0.00914818	9987.34	8930.36	9760.34	11643.3	14118.1	13632.6	14142.7
ENSMUSG00000041936.18	Agrn	749.982	1.04424	0.2698	3.87042	0.00010865	0.00914818	569.865	607.46	329.589	543.519	1030.4	1185.8	957.456
ENSMUSG00000040133.2	Gpr176	1024.15	-1.10542	0.286275	-3.86138	0.000112749	0.00944119	1526.72	1119.28	1390.23	1249.27	378.258	722.375	742.649
ENSMUSG00000038578.15	Susd1	340.334	-1.52294	0.394896	-3.85656	0.000114993	0.00952445	320.855	727.889	414.809	415.389	134.066	140.776	215.886
ENSMUSG00000059486.11	Kbtbd2	527.075	-1.03532	0.268406	-3.85731	0.000114643	0.00952445	617.218	577.352	817.297	673.715	261.429	411.024	310.876
ENSMUSG00000062488.9	Ifit3b	1633.75	1.03111	0.267939	3.84831	0.000118937	0.00979787	1365.06	1268.05	712.568	1145.94	2575.99	1785.9	2528.03
ENSMUSG00000030016.14	Zfp638	1901.96	0.535978	0.13954	3.84104	0.000122514	0.0100382	1563.46	1730.29	1612.01	1436.29	2374.89	2090.06	2438.44
ENSMUSG00000018171.9	Vmp1	6208.78	-0.54985	0.143219	-3.83921	0.00012343	0.0100592	6506.1	7173.51	8251.01	6644.15	5389.46	4342.47	4923.29
ENSMUSG00000030327.8	Necap1	1051.35	-1.02092	0.266207	-3.83508	0.000125523	0.0101754	1064.62	1326.49	1588.39	1363.96	879.092	483.981	614.197
ENSMUSG00000032579.14	Hemk1	167.048	1.2626	0.329695	3.8296	0.000128349	0.0103494	92.2561	101.834	92.408	129.163	245.15	219.898	282.811
ENSMUSG00000021752.13	Kctd6	99.5847	-2.17212	0.567739	-3.82592	0.000130284	0.0104501	199.208	140.796	73.9264	180.828	37.347	41.1024	20.5092
ENSMUSG00000059586.9	Nsmce2	849.582	-0.737141	0.192751	-3.82432	0.000131133	0.0104632	971.547	917.388	1182.82	1006.44	582.231	556.938	697.313
ENSMUSG00000021215.15	Net1	1903.4	0.471822	0.123426	3.82272	0.000131987	0.0104765	1553.66	1753.31	1618.17	1569.59	2349.99	2104.44	2306.75
ENSMUSG00000092021.8	Gbp11	875.842	1.12931	0.295668	3.81953	0.000133704	0.0105578	823.774	485.259	479.495	519.753	928.888	1403.65	1457.23
ENSMUSG00000059187.12	Tafa1	93.27	-3.96521	1.03855	-3.81803	0.00013452	0.0105674	272.686	265.653	16.4281	65.0982	3.83046	20.5512	5.39716
ENSMUSG00000060586.10	H2-Eb1	308.096	1.70999	0.451099	3.79071	0.000150218	0.0117401	191.044	168.247	119.104	142.596	836.957	421.3	268.779
ENSMUSG00000112148.1	Lilrb4a	46.4071	9.28919	2.45693	3.78081	0.00015632	0.0121547	0	0	0	0	312.183	12.3307	0
ENSMUSG00000108660.1	Gm21284	34.6882	-8.33036	2.20428	-3.77918	0.000157347	0.0121724	0	123.086	70.8461	47.532	0	0	0
ENSMUSG00000061353.11	Cxcl12	460808	0.428345	0.113598	3.77072	0.000162779	0.012529	425227	426842	352934	391703	499194	535703	577417
ENSMUSG00000031343.13	Gabra3	33.2402	-8.26861	2.19513	-3.76679	0.000165359	0.0126086	0	77.9248	89.3277	64.0649	0	0	0
ENSMUSG00000060924.15	Csmd1	1933.46	-0.934857	0.248195	-3.76663	0.000165467	0.0126086	3313.06	2149.13	1672.58	2534.7	1310.98	1150.87	1334.18
ENSMUSG00000040152.8	Thbs1	1651.49	0.652442	0.173508	3.7603	0.000169709	0.0128038	1197.7	1121.94	1556.56	1400.13	1970.77	2078.75	2173.98
ENSMUSG00000068606.5	Gm4841	729.853	0.917471	0.243975	3.76051	0.000169567	0.0128038	598.44	587.978	408.649	507.353	1156.8	794.304	1030.86
ENSMUSG00000074221.12	Zfp568	181.108	-2.14136	0.571563	-3.74651	0.000179314	0.0134618	258.807	398.479	294.679	125.03	27.7709	83.2324	72.322
ENSMUSG00000029417.9	Cxcl9	50836.3	0.603781	0.161229	3.74487	0.000180484	0.0134832	43782.5	44426	45375.4	31762.8	70337.9	56966.9	61385.1
ENSMUSG00000016262.14	Sertad4	32.9403	-8.2557	2.2068	-3.74102	0.000183272	0.0136247	72.6619	0	110.89	45.4654	0	0	0
ENSMUSG00000109608.1	Gm45597	22.4147	-5.24086	1.40179	-3.73868	0.000184992	0.0136858	7.34783	54.0161	48.2575	43.3988	0.957616	2.05512	0
ENSMUSG00000085564.1	Gm12198	40.0502	-4.42802	1.18597	-3.73367	0.000188708	0.0138265	163.285	31.8784	42.097	32.0325	0	5.1378	4.31773
ENSMUSG00000047875.6	Gpr157	94.2086	-3.46318	0.927335	-3.73455	0.000188049	0.0138265	151.855	146.995	189.95	125.03	19.1523	0	22.6681
ENSMUSG00000011008.13	Mcoln2	38.2561	-8.4724	2.27314	-3.72719	0.000193627	0.0141191	193.493	58.4436	0	14.4663	0	0	0
ENSMUSG00000059588.13	Calcrl	281.467	-1.48978	0.4	-3.72445	0.000195742	0.0142053	492.305	469.32	286.465	298.625	196.311	101.728	115.499
ENSMUSG00000038213.7	Tapbpl	1957.26	0.620184	0.167213	3.70894	0.000208131	0.0150328	1613.26	1556.73	1834.81	1322.63	2665.05	2254.47	2383.39
ENSMUSG00000086677.1	Tvp23bos	14.4063	-7.06464	1.90745	-3.70371	0.000212466	0.0152399	52.2513	27.4508	8.21404	12.3997	0	0	0
ENSMUSG00000105975.4	Gm9831	12.2386	-6.82766	1.84378	-3.70308	0.000212998	0.0152399	27.7585	14.1682	29.7759	13.433	0	0	0
ENSMUSG00000104501.1	Gm37736	31.0986	-8.17241	2.21495	-3.68966	0.000224557	0.0159918	0	55.7871	75.9799	84.731	0	0	0
ENSMUSG00000034438.16	Gbp8	278.801	1.64796	0.446926	3.68732	0.000226628	0.0160642	75.1112	165.59	168.388	170.495	284.412	626.812	450.123
ENSMUSG00000057229.11	Dmac2	254.392	1.12567	0.306406	3.67377	0.000238998	0.0168626	177.164	151.422	206.378	136.396	322.717	343.205	433.932
ENSMUSG00000023367.14	Tmem176a	19906.7	-0.35935	0.0982158	-3.65878	0.000253416	0.0177975	20814	23933.6	22182	20518.3	17717.8	16694.8	16757.1
ENSMUSG00000103668.1	Gm38186	11.6227	-6.75312	1.84922	-3.65186	0.000260343	0.0182001	13.8792	30.9928	17.4548	18.5995	0	0	0
ENSMUSG00000030214.6	Plbd1	390.619	1.29155	0.353811	3.65039	0.000261839	0.0182211	151.039	255.027	262.849	290.359	520.943	455.209	784.747
ENSMUSG00000105139.1	Gm19391	35.4757	-8.36281	2.29317	-3.64683	0.000265497	0.0183122	0	139.911	94.4615	12.3997	0	0	0
ENSMUSG00000039704.6	Lmbrd2	36.4439	-5.26081	1.44259	-3.64678	0.000265551	0.0183122	50.6184	9.74061	100.622	87.8309	4.78808	0	0
ENSMUSG00000043091.8	Tuba1c	924.692	0.567441	0.155734	3.64367	0.000268782	0.0184515	809.078	755.34	749.531	734.68	1220	1159.09	1012.51
ENSMUSG00000045636.16	Mtus1	371.68	-1.69332	0.466553	-3.62942	0.000284061	0.019413	827.856	516.252	258.742	498.053	96.7192	194.209	196.457
ENSMUSG00000078922.9	Tgtp1	5317.39	0.537391	0.148284	3.62407	0.000289997	0.0197302	4322.98	4053.86	4272.33	5077.66	7211.81	6607.21	5492.15
ENSMUSG00000040147.14	Maob	2385.58	-0.431706	0.119384	-3.61611	0.000299065	0.0202567	2740.74	2754.82	2707.55	2468.57	1960.24	2116.77	1862.02
ENSMUSG00000031584.16	Gsr	2326.38	-0.656698	0.181843	-3.61135	0.000304607	0.0205408	3151.4	2672.47	2660.32	2489.23	2062.71	1409.81	1754.08
ENSMUSG00000107568.1	Gm18840	395.613	-0.799039	0.221453	-3.60816	0.000308375	0.0206125	520.88	526.878	466.147	410.222	272.921	289.772	267.699
ENSMUSG00000029348.11	Asphd2	27.8204	-8.01259	2.22046	-3.60853	0.000307934	0.0206125	77.5605	58.4436	57.4983	0	0	0	0
ENSMUSG00000032596.14	Uba7	2872.98	0.682556	0.189287	3.60594	0.000311029	0.0206991	2681.96	2469.69	1708.52	2216.44	3810.35	3273.81	3850.33
ENSMUSG00000043251.6	Exoc3l	24.8832	-7.85228	2.18572	-3.59253	0.00032748	0.0216052	144.507	0.88551	9.2408	18.5995	0	0	0
ENSMUSG00000086728.2	Man2c1os	100.067	-2.78334	0.774537	-3.59356	0.000326195	0.0216052	214.72	93.864	209.458	109.53	4.78808	19.5236	44.2567
ENSMUSG00000030538.15	Cib1	1653.9	-0.749481	0.208784	-3.58974	0.000331003	0.0217435	1921.05	1783.42	2600.77	1653.29	1294.7	1160.12	1099.94
ENSMUSG00000040260.8	Daam2	824.142	1.08694	0.303253	3.58427	0.000338025	0.0221094	648.242	476.404	351.15	737.78	1308.1	1243.35	976.886
ENSMUSG00000082292.3	Gm12250	3422.64	0.77781	0.217285	3.57967	0.000344029	0.022406	2755.44	2956.72	2548.41	2161.67	5747.61	3325.19	4347.95
ENSMUSG00000020681.14	Ace	447.094	1.54563	0.432655	3.57242	0.000353696	0.0229266	280.851	394.937	132.451	167.395	801.525	530.221	807.415
ENSMUSG00000028878.11	Fam76a	723.227	0.815077	0.228221	3.57143	0.000355031	0.0229266	400.865	588.864	555.475	626.183	1018.9	872.399	974.727
ENSMUSG00000073787.4	Gm10575	84.0259	-2.57418	0.721605	-3.5673	0.000360684	0.0231934	141.242	187.728	159.147	30.9992	21.0676	17.4685	26.9858
ENSMUSG00000005057.13	Sh2b2	92.7559	-1.73157	0.485925	-3.56346	0.000366001	0.0232411	97.1547	93.864	168.388	167.395	43.0927	36.9922	38.8596
ENSMUSG00000032507.15	Fbxl2	131.645	-1.60418	0.450103	-3.56403	0.000365205	0.0232411	182.879	250.599	145.799	156.029	83.3126	43.1575	55.051
ENSMUSG00000043289.12	Mei4	72.6557	-4.61525	1.29501	-3.56387	0.000365432	0.0232411	82.459	68.1842	183.789	156.029	0	0	15.1121
ENSMUSG00000009876.13	Cox4i2	297.272	-0.960297	0.27027	-3.5531	0.000380724	0.0240756	404.947	399.365	386.06	302.758	162.795	211.677	201.854
ENSMUSG00000029755.10	Dlx5	2115.27	0.610784	0.172214	3.54665	0.000390159	0.0245704	1505.49	1906.5	1516.52	1937.45	2940.84	2581.23	2346.69
ENSMUSG00000027822.16	Slc33a1	1562.15	-0.885867	0.250411	-3.53766	0.00040369	0.0253178	1464.67	2202.26	2361.54	1704.95	1171.16	789.166	1181.98
ENSMUSG00000020122.16	Egfr	4033.96	-0.552257	0.15643	-3.53038	0.000414958	0.0258121	5595.78	4464.74	4392.46	4124.95	3404.33	2846.34	3260.96
ENSMUSG00000024421.16	Lama3	96.843	-3.29092	0.932031	-3.53092	0.000414121	0.0258121	241.662	80.5814	133.478	170.495	5.7457	40.0749	2.15886
ENSMUSG00000027848.12	Olfml3	6456.84	0.723688	0.205068	3.52902	0.000417102	0.02584	4038.86	5980.73	4069.03	5998.34	8401.17	9396.01	7091.87
ENSMUSG00000068134.13	Zfp120	604.223	-1.10949	0.314543	-3.52731	0.0004198	0.0259019	977.262	860.715	780.334	502.186	390.707	424.382	270.937
ENSMUSG00000021136.13	Smoc1	1570.7	0.840437	0.238425	3.52495	0.000423556	0.0259868	1180.55	1288.42	780.334	1419.76	2198.69	2255.5	1818.84
ENSMUSG00000057092.12	Fxyd3	106.613	-3.77794	1.07197	-3.52431	0.000424588	0.0259868	309.425	334.723	33.8829	25.8326	9.57616	3.08268	25.9064
ENSMUSG00000043140.9	Tmem186	497.313	-0.905578	0.257062	-3.52279	0.000427026	0.0260315	623.749	685.384	614	548.685	261.429	420.272	308.718
ENSMUSG00000026627.7	Pacc1	118.93	-1.93042	0.548634	-3.51859	0.000433849	0.0261338	88.9904	243.515	231.02	128.13	58.4146	42.13	35.6213
ENSMUSG00000031849.9	Comp	617.734	0.943109	0.267971	3.51944	0.000432461	0.0261338	380.455	412.647	408.649	560.051	960.489	628.867	952.059
ENSMUSG00000032744.4	Heyl	2571.4	-0.626803	0.178081	-3.51976	0.000431932	0.0261338	3171	2796.44	3172.67	2907.72	2179.53	2174.32	1503.65
ENSMUSG00000052516.17	Robo2	240.017	-1.39244	0.396847	-3.50875	0.000450219	0.0269002	281.667	239.973	437.398	339.957	80.4398	137.693	153.279
ENSMUSG00000079334.8	Naa80	595.351	-0.812742	0.231688	-3.50792	0.000451632	0.0269002	814.793	829.722	559.582	700.581	427.097	376.087	438.25
ENSMUSG00000103441.1	7530428D23Rik	506.769	1.10746	0.315714	3.50778	0.000451867	0.0269002	213.904	333.837	328.562	473.254	731.619	660.721	787.986
ENSMUSG00000046618.7	Olfml2a	2075.45	0.721195	0.206226	3.4971	0.00047034	0.027891	1636.12	1890.56	1261.88	1672.92	2182.41	3127.89	2681.31
ENSMUSG00000026581.14	Sell	29.0655	8.61395	2.46449	3.49522	0.000473663	0.0279791	0	0	0	0	95.7616	0	106.864
ENSMUSG00000050075.8	Gpr171	1128.75	-1.23468	0.354011	-3.48769	0.000487208	0.0286682	1442.62	1421.24	2097.66	993.006	361.979	747.036	790.144
ENSMUSG00000019989.8	Enpp3	2980.32	-0.807859	0.23188	-3.48395	0.000494072	0.0289602	4657.71	2908.01	3164.46	3795.33	1626.03	2548.35	2050.92
ENSMUSG00000034459.8	Ifit1	7461.63	0.880044	0.252818	3.48094	0.00049965	0.029175	6559.17	6613.87	4050.55	4601.31	10590.3	7050.09	12506.3
ENSMUSG00000005672.12	Kit	1029.65	1.45111	0.417117	3.4789	0.000503481	0.0292865	1054.82	401.136	365.525	528.019	1511.12	2194.87	1116.13
ENSMUSG00000028391.16	Wdr31	27.3835	5.62566	1.6187	3.47542	0.000510054	0.029444	0	0	5.13378	0	76.6093	62.6812	46.4156
ENSMUSG00000042677.7	Zc3h12a	293.024	-1.42399	0.409645	-3.47615	0.000508659	0.029444	319.223	499.427	428.157	347.191	95.7616	230.174	119.817
ENSMUSG00000031565.18	Fgfr1	2629.25	0.469734	0.135233	3.4735	0.000513708	0.0295431	2195.37	2498.02	2150.03	2134.81	3414.86	2810.38	3108.76
ENSMUSG00000006641.12	Slc5a6	259.819	-2.53632	0.730873	-3.47026	0.000519961	0.0297902	473.527	444.526	355.257	328.591	166.625	23.6339	17.2709
ENSMUSG00000018923.13	Med11	162.899	-1.65185	0.476563	-3.46617	0.000527923	0.0301331	191.86	348.005	166.334	209.761	105.338	63.7088	49.6539
ENSMUSG00000028986.12	Klhl7	514.726	1.31169	0.378613	3.46447	0.000531273	0.0302112	177.981	466.664	276.197	331.691	629.154	993.651	709.187
ENSMUSG00000057604.9	Lmcd1	1204.71	-1.09009	0.314811	-3.46267	0.000534849	0.0303015	1771.64	1807.33	1659.24	960.974	519.986	681.273	984.442
ENSMUSG00000064370.1	mt-Cytb	112864	0.517289	0.149575	3.45838	0.000543429	0.0306736	89376.6	104250	87353.3	97996.6	162682	131564	112990
ENSMUSG00000028949.13	Smarcd3	543.369	1.1492	0.332457	3.45667	0.000546884	0.0307547	416.377	224.034	352.177	427.788	651.179	1042.97	669.248
ENSMUSG00000112508.1	NA	30.0248	8.66101	2.51129	3.44883	0.000563011	0.0315452	0	0	0	0	175.244	0	34.5418
ENSMUSG00000021281.15	Tnfaip2	1257.88	0.798753	0.231692	3.44748	0.000565852	0.0315882	1213.21	1020.99	819.351	745.013	1654.76	1866.05	1441.04
ENSMUSG00000078442.3	Ccdc105	11.4389	-6.73167	1.95932	-3.43571	0.000591002	0.0327522	40.0049	15.9392	7.18729	16.5329	0	0	0
ENSMUSG00000092323.1	BB365896	37.4381	-2.48396	0.722786	-3.43665	0.000588953	0.0327522	45.7199	33.6494	73.9264	76.4646	7.66093	11.3032	11.8737
ENSMUSG00000026828.11	Galnt5	144.723	-2.39044	0.696927	-3.42998	0.000603636	0.0332109	262.889	362.173	82.1404	174.629	21.0676	78.0946	26.9858
ENSMUSG00000037007.17	Zfp113	377.67	-0.969695	0.282695	-3.43018	0.000603192	0.0332109	421.276	469.32	563.689	446.388	201.099	311.351	215.886
ENSMUSG00000011118.4	Panx3	259.852	2.11608	0.617346	3.4277	0.000608723	0.0333703	78.3769	189.499	64.6856	92.9975	305.48	875.482	202.933
ENSMUSG00000104420.1	E230020A03Rik	82.0426	-3.01431	0.880694	-3.42265	0.000620137	0.0338741	192.677	181.53	68.7926	79.5645	5.7457	5.1378	37.7801
ENSMUSG00000026678.10	Rgs5	2045.9	-1.64404	0.48061	-3.42073	0.000624524	0.0339919	1568.35	3815.66	4044.39	2052.14	1602.09	798.414	361.61
ENSMUSG00000030321.15	Efcab12	27.7058	8.54468	2.49977	3.41819	0.000630397	0.0341895	0	0	0	0	0	118.169	74.4808
ENSMUSG00000029761.16	Cald1	10510.8	-0.34107	0.0998587	-3.41553	0.000636588	0.0344028	11960.6	11530.2	12081.8	10379.6	9116.51	9256.26	8859.98
ENSMUSG00000036602.14	Alx1	176.843	1.5523	0.455468	3.40815	0.000654049	0.0352216	89.8069	156.735	72.8996	65.0982	349.53	226.063	272.017
ENSMUSG00000020536.12	Llgl1	252.447	1.41248	0.414815	3.40509	0.000661423	0.0354932	138.792	115.116	95.4883	237.66	322.717	404.859	443.647
ENSMUSG00000025494.8	Sigirr	27.1322	8.51457	2.50546	3.3984	0.000677816	0.0362453	0	0	0	0	67.0331	0	121.976
ENSMUSG00000020802.8	Ube2o	152.712	2.02908	0.598697	3.38917	0.000701051	0.0372265	35.1063	80.5814	91.3812	54.7652	211.633	460.347	129.532
ENSMUSG00000030096.8	Slc6a6	14999.1	0.778332	0.229591	3.39009	0.000698705	0.0372265	10353.9	10823.6	10220.3	14283.4	25470.7	20052.8	13302.9
ENSMUSG00000022604.18	Cep97	267.653	1.41164	0.417598	3.38038	0.000723847	0.038171	174.715	99.1771	196.11	151.896	268.133	587.765	385.357
ENSMUSG00000030268.17	Bcat1	613.661	1.06861	0.316101	3.3806	0.000723273	0.038171	255.541	427.701	561.635	415.389	902.074	722.375	988.76
ENSMUSG00000022248.14	Rad1	850.003	-0.911599	0.269869	-3.37794	0.000730319	0.0383795	1098.91	897.021	1324.51	908.275	415.605	702.851	568.861
ENSMUSG00000041298.15	Katnal1	296.88	1.13049	0.335172	3.37287	0.000743879	0.0389578	246.561	139.911	169.415	226.294	359.106	407.942	518.127
ENSMUSG00000020283.5	Pex13	1231.51	-0.602896	0.179058	-3.36704	0.000759796	0.0396011	1489.98	1629.34	1269.07	1350.53	830.253	1063.53	942.344
ENSMUSG00000028480.14	Glipr2	797.103	-1.09443	0.325097	-3.36647	0.00076136	0.0396011	823.774	1249.45	1219.79	812.178	305.48	629.895	507.333
ENSMUSG00000020400.17	Tnip1	1869.54	-0.52582	0.156891	-3.35151	0.000803734	0.041663	2337.43	2404.16	1923.11	1891.98	1516.86	1407.76	1537.11
ENSMUSG00000028073.15	Pear1	318.801	-1.23773	0.36985	-3.34656	0.000818206	0.0421594	462.914	417.075	376.819	426.755	113.956	152.079	269.858
ENSMUSG00000028211.11	Trp53inp1	507.495	-1.25759	0.37581	-3.34634	0.000818845	0.0421594	797.648	415.304	822.431	653.049	229.828	407.942	206.172
ENSMUSG00000025200.6	Cwf19l1	319.706	0.965628	0.288833	3.3432	0.000828176	0.0422175	234.314	174.445	254.635	239.727	426.139	531.249	365.928
ENSMUSG00000035000.8	Dpp4	26.8307	8.49873	2.54283	3.34224	0.000831052	0.0422175	0	0	0	0	147.473	0	39.939
ENSMUSG00000036091.8	Hyal3	29.2808	-5.22708	1.56377	-3.3426	0.000829966	0.0422175	1.63285	47.8175	125.264	24.7993	1.91523	2.05512	0
ENSMUSG00000037640.15	Zfp60	553.799	-0.774692	0.231616	-3.34472	0.000823656	0.0422175	521.696	758.882	662.257	737.78	380.174	363.756	431.773
ENSMUSG00000025533.15	Asl	344.762	-0.996837	0.298478	-3.33973	0.000838597	0.0424592	466.996	521.565	339.856	416.422	241.319	248.67	166.233
ENSMUSG00000104667.1	Gm4961	26.7743	-6.98714	2.0942	-3.33643	0.000848614	0.0428241	0	56.6726	73.9264	54.7652	0.957616	0	0
ENSMUSG00000024812.9	Tjp2	26.2943	-7.93093	2.3792	-3.33345	0.000857768	0.0428326	0	133.712	14.3746	35.1324	0	0	0
ENSMUSG00000030737.17	Slco2b1	616.745	-2.0951	0.628645	-3.33272	0.000860025	0.0428326	982.977	1087.41	869.662	711.947	95.7616	488.091	57.2099
ENSMUSG00000067276.5	Capn6	23.1034	-7.7436	2.32245	-3.33424	0.000855334	0.0428326	0	43.39	82.1404	35.1324	0	0	0
ENSMUSG00000092241.1	Gm20522	21.1029	-3.66813	1.10026	-3.33388	0.000856448	0.0428326	24.4928	69.9553	20.5351	23.766	2.87285	1.02756	4.31773
ENSMUSG00000002812.4	Flii	970.307	0.610427	0.18374	3.32223	0.000893005	0.0443303	760.909	764.195	772.12	852.477	1431.64	1039.89	1137.72
ENSMUSG00000050373.13	Snx21	1312.06	1.10909	0.334187	3.31877	0.000904145	0.0447376	799.281	704.866	818.324	1167.63	1038.06	2565.82	2040.13
ENSMUSG00000035297.14	Cops4	1964.37	-0.495999	0.149587	-3.3158	0.000913822	0.04507	2308.85	2466.14	2238.33	1912.65	1515.91	1704.72	1530.63
ENSMUSG00000022504.9	Ciita	19.7888	6.54238	1.9737	3.31478	0.000917144	0.045088	0	0	0	2.06661	17.2371	113.032	5.39716
ENSMUSG00000025279.7	Dnase1l3	11.3372	7.25627	2.19249	3.3096	0.000934297	0.0451061	0	0	0	0	52.6689	10.2756	16.1915
ENSMUSG00000027993.16	Trim2	4161.63	-0.709633	0.214425	-3.30946	0.00093475	0.0451061	4469.12	4582.51	5752.91	5053.9	2377.76	2705.57	4028.44
ENSMUSG00000056116.18	H2-T22	8797.76	0.439524	0.132815	3.30931	0.000935272	0.0451061	8666.36	7257.64	7015.82	7423.26	11447.3	9219.27	10246
ENSMUSG00000063975.13	Slco1a5	632.699	-1.36815	0.413272	-3.31053	0.000931192	0.0451061	831.122	1057.3	534.94	990.94	225.997	221.953	544.034
ENSMUSG00000096916.7	Zfp850	23.5466	-7.77097	2.34553	-3.31309	0.000922707	0.0451061	0	37.1914	99.5953	26.8659	0	0	0
ENSMUSG00000097494.7	4933406C10Rik	10.7965	-6.6468	2.00752	-3.31094	0.000929821	0.0451061	12.2464	30.9928	26.6956	5.16653	0	0	0
ENSMUSG00000044550.11	Tceal3	64.6792	-2.29854	0.695095	-3.30681	0.000943659	0.0453671	115.932	97.4061	81.1137	96.0974	9.57616	11.3032	38.8596
ENSMUSG00000103442.5	Pcdha1	26.0956	-7.91941	2.39654	-3.30452	0.000951381	0.0455945	26.9421	11.5116	0	143.629	0	0	0
ENSMUSG00000010751.15	Tnfrsf22	18.4336	4.80173	1.45394	3.30256	0.000958054	0.0456255	0.816426	0	1.02676	4.13322	45.008	68.8466	8.63546
ENSMUSG00000015290.15	Ubl4a	1109.99	0.552232	0.167208	3.30266	0.000957723	0.0456255	831.122	1073.24	834.752	941.341	1398.12	1300.89	1351.45
ENSMUSG00000025171.1	Ubtd1	72.9193	1.79002	0.542295	3.30083	0.000964004	0.0456255	50.6184	26.5653	25.6689	38.2323	88.1007	127.418	151.121
ENSMUSG00000050240.14	Hic2	144.333	2.61862	0.793148	3.30155	0.000961536	0.0456255	8.16426	29.2218	50.311	91.9642	125.448	426.438	273.096
ENSMUSG00000000049.11	Apoh	21.4321	-5.7314	1.73755	-3.29856	0.000971831	0.0458536	0.816426	56.6726	44.1505	45.4654	0	1.02756	1.07943
ENSMUSG00000025402.12	Nab2	236.717	1.80586	0.547845	3.2963	0.000979688	0.0460816	82.459	198.354	47.2308	127.097	290.158	560.02	343.259
ENSMUSG00000037544.13	Dlgap5	24.9623	8.39417	2.5487	3.29351	0.000989445	0.0463973	0	0	0	0	0	68.8466	104.705
ENSMUSG00000042396.10	Rbm7	3825.49	-0.648082	0.196912	-3.29123	0.000997508	0.0464894	5789.28	3840.46	4109.08	4271.68	2675.58	3389.92	2560.41
ENSMUSG00000046447.3	Camk2n1	671.366	0.808309	0.245561	3.29169	0.000995891	0.0464894	644.16	515.367	421.996	438.121	908.778	752.174	995.236
ENSMUSG00000020057.2	Dram1	1920.88	-0.830689	0.252863	-3.28513	0.00101936	0.0473631	2823.2	2759.25	2239.35	1581.99	1176.91	1611.21	1180.9
ENSMUSG00000022221.13	Ripk3	1271.42	-0.881057	0.268286	-3.28402	0.00102338	0.0474051	1692.45	1554.07	2026.82	1012.64	800.567	773.753	988.76
ENSMUSG00000061666.6	Gdpd1	24.647	8.37614	2.55241	3.28166	0.00103198	0.0476588	0	0	0	0	54.5841	117.142	0
ENSMUSG00000048924.14	Ccdc125	90.719	1.31093	0.399738	3.27946	0.00104006	0.0478865	56.3334	53.1306	53.3913	57.8651	122.575	123.307	165.153
ENSMUSG00000035311.16	Gnptab	741.845	-1.64942	0.504388	-3.27013	0.00107496	0.0491966	1283.42	707.522	1251.61	923.775	419.436	93.508	484.665
ENSMUSG00000036617.16	Etl4	276.274	1.33435	0.40804	3.27015	0.00107491	0.0491966	104.503	159.392	189.95	211.828	520.943	259.973	478.188
ENSMUSG00000022685.8	Parn	816.198	-0.986379	0.301774	-3.2686	0.00108081	0.0493162	1295.67	1019.22	1167.42	637.549	620.535	422.327	519.207
