# Supplementary material for: Cell circuits between leukemic cells and mesenchymal stem cells block lymphopoiesis by activating lymphotoxin beta receptor signaling
Source: eLife. 2023 Mar 13;12:e83533. doi: 10.7554/eLife.83533 (PMC10042536; doi:10.7554/eLife.83533)
Supplement: Supplementary file 3. [file elife-83533-supp3.xlsx]

## Sheet: Sheet1
	clone#	flurochrome	company	cat#	dilution	link
CD19	6D5	PE	Biolegend	115508	1/100	https://www.biolegend.com/fr-lu/products/pe-anti-mouse-cd19-antibody-1530
ckit	2B8	BV711	Biolegend	105835	1/100	https://www.biolegend.com/nl-be/products/brilliant-violet-711-anti-mouse-cd117-c-kit-antibody-12049
IgM	II/41	PECy7	eBioscience	25-5790-82	1/100	https://www.thermofisher.com/antibody/product/IgM-Antibody-clone-II-41-Monoclonal/25-5790-82
CD93	AA4.1	APC	Biolegend	136510	1/100	https://www.biolegend.com/nl-nl/search-results/apc-anti-mouse-cd93-aa4-1-early-b-lineage-antibody-6621
CD11B	M1/70	PE	Biolegend	101208	1/100	https://www.biolegend.com/fr-ch/products/pe-anti-mouse-human-cd11b-antibody-349
Gr-1	RB6-8C5	PECy7	eBioscience	25-5931-82	1/100	https://www.thermofisher.com/antibody/product/Ly-6G-Ly-6C-Antibody-clone-RB6-8C5-Monoclonal/25-5931-82
CD115	AFS98	APC	Biolegend	135510	1/100	https://www.biolegend.com/nl-be/products/apc-anti-mouse-cd115-csf-1r-antibody-6336
CD71	RI7217	PE	Biolegend	113808	1/100	https://www.biolegend.com/de-at/products/pe-anti-mouse-cd71-antibody-1631
Ter119	TER-119	APC-Cy7	Biolegend	116223	1/100	https://www.biolegend.com/fr-fr/products/apc-cyanine7-anti-mouse-ter-119-erythroid-cells-antibody-3905
CD45.1	A20	APC-Cy7	Biolegend	110716	1/100	https://www.biolegend.com/de-de/products/apc-cyanine7-anti-mouse-cd45-1-antibody-2320
CD45.2	104	APC-Cy7	Biolegend	109824	1/100	https://www.biolegend.com/fr-lu/products/apc-cyanine7-anti-mouse-cd45-2-antibody-3906
CD31	390	APC	Biolegend	102410	1/100	https://www.biolegend.com/it-it/products/apc-anti-mouse-cd31-antibody-118
CD144	BV13	Alexa 647	Biolegend	138006	1/100	https://www.biolegend.com/nl-be/products/alexa-fluor-647-anti-mouse-cd144-ve-cadherin-antibody-6569
Streptavidin		BV711	Biolegend	405241	1/200	https://www.biolegend.com/de-at/products/brilliant-violet-711-streptavidin-9665
LEPR		Biotinylated	R&D	BAF497	1/100	https://www.rndsystems.com/products/mouse-leptin-r-biotinylated-antibody_baf497
PDGFRa	APA5	PE	Biolegend	135906	1/100	https://www.biolegend.com/nl-be/products/pe-anti-mouse-cd140a-antibody-6253
NGFR	ME20.4	APC	eBioscience	17-9400-42	1/100	https://www.thermofisher.com/antibody/product/CD271-NGF-Receptor-Antibody-clone-ME20-4-Monoclonal/17-9400-42
CD19	6D5	Alexa488	Biolegend	115521	1/200	https://www.biolegend.com/fr-ch/products/alexa-fluor-488-anti-mouse-cd19-antibody-2704
B220	RA3-6B2	FITC	Biolegend	103206	1/200	https://www.biolegend.com/fr-lu/products/fitc-anti-mouse-human-cd45r-b220-antibody-445
CD3e	145-2C11	FITC	Biolegend	100306	1/200	https://www.biolegend.com/it-it/products/fitc-anti-mouse-cd3epsilon-antibody-23
CD4	RM4-5	FITC	Biolegend	100510	1/200	https://www.biolegend.com/fr-lu/products/fitc-anti-mouse-cd4-antibody-480
Gr1	RB6-8C5	FITC	Biolegend	108406	1/200	https://www.biolegend.com/fr-ch/products/fitc-anti-mouse-ly-6g-ly-6c-gr-1-antibody-458
NK1.1	PK136	FITC	Biolegend	108706	1/200	https://www.biolegend.com/ja-jp/products/fitc-anti-mouse-nk-1-1-antibody-429
Ter119	TER-119	FITC	Biolegend	116206	1/200	https://www.biolegend.com/it-it/products/fitc-anti-mouse-ter-119-erythroid-cells-antibody-1865
CD11b	M1/70	FITC	Biolegend	101206	1/200	https://www.biolegend.com/de-at/products/fitc-anti-mouse-human-cd11b-antibody-347
Sca1	D7	PECy7	Biolegend	108114	1/400	https://www.biolegend.com/it-it/products/pe-cyanine7-anti-mouse-ly-6a-e-sca-1-antibody-3137
CD34	HM34	PE	Biolegend	128610	1/100	https://www.biolegend.com/nl-nl/products/pe-anti-mouse-cd34-antibody-6332
CD16/32	93	APC	Biolegend	101326	1/100	https://www.biolegend.com/nl-nl/products/apc-anti-mouse-cd16-32-antibody-6282
