# Supplementary material for: Cell circuits between leukemic cells and mesenchymal stem cells block lymphopoiesis by activating lymphotoxin beta receptor signaling
Source: eLife. 2023 Mar 13;12:e83533. doi: 10.7554/eLife.83533 (PMC10042536; doi:10.7554/eLife.83533)
Supplement: Supplementary file 4. [file elife-83533-supp4.xlsx]

## Sheet: Fig1
A
Column	day 6	day 14
Shapiro-Wilk test
W	0.9206	0.9659
P value	0.4352	0.8482
Passed normality test (alpha=0.05)?	Yes	Yes
P value summary	ns	ns
B
proB
Column	day 0	day 6	day 14
Shapiro-Wilk test
W	0.8864	0.9503	0.9572
P value	0.2165	0.7143	0.7881
Passed normality test (alpha=0.05)?	Yes	Yes	Yes
P value summary	ns	ns	ns
preB
Column	day 0	day 6	day 14
Shapiro-Wilk test
W	0.9525	0.9605	0.8969
P value	0.7362	0.8145	0.3927
Passed normality test (alpha=0.05)?	Yes	Yes	Yes
P value summary	ns	ns	ns
Imm. B
Column	day 0	day 6	day 14
Shapiro-Wilk test
W	0.9199	0.8863	0.8515
P value	0.4294	0.2161	0.1992
Passed normality test (alpha=0.05)?	Yes	Yes	Yes
P value summary	ns	ns	ns
Mature B
Column	day 0	day 6	day 14
Shapiro-Wilk test
W	0.9109	0.704	0.8905
P value	0.3607	0.0025	0.3598
Passed normality test (alpha=0.05)?	Yes	No	Yes
P value summary	ns	**	ns
day 6
vs.
day 0
Mann Whitney test
P value	0.0002
Exact or approximate P value?	Exact
P value summary	***
Significantly different (P < 0.05)?	Yes
One- or two-tailed P value?	Two-tailed
Sum of ranks in column A,B	100 , 36
Mann-Whitney U	0
C
Column	day 0	day 14
Shapiro-Wilk test
W	0.9468	0.889
P value	0.6786	0.352
Passed normality test (alpha=0.05)?	Yes	Yes
P value summary	ns	ns
D
Column	day 0	day 6	day 14
Shapiro-Wilk test
W	0.9301	0.9588	0.8005
P value	0.517	0.7984	0.0818
Passed normality test (alpha=0.05)?	Yes	Yes	Yes
P value summary	ns	ns	ns
E
Immature RBC
Column	day 0	day 6	day 14
Shapiro-Wilk test
W	0.8863	0.9637	0.8072
P value	0.2162	0.8444	0.0926
Passed normality test (alpha=0.05)?	Yes	Yes	Yes
P value summary	ns	ns	ns
Mature RBC
Column	day 0	day 6	day 14
Shapiro-Wilk test
W	0.9254	0.9561	0.9255
P value	0.4752	0.7722	0.566
Passed normality test (alpha=0.05)?	Yes	Yes	Yes
P value summary	ns	ns	ns

## Sheet: Fig2
B
LTb
Column	Large preB	Small PreB	Imm. B	Mat. B	ALL
Shapiro-Wilk test
W	0.8641	0.907	0.756	0.9393	0.918
P value	0.2753	0.4665	0.0439	0.6502	0.5261
Passed normality test (alpha=0.05)?	Yes	Yes	No	Yes	Yes
P value summary	ns	ns	*	ns	ns
Lta
Column	Large preB	Small PreB	Imm. B	Mat. B	ALL
Shapiro-Wilk test
W	0.8342	0.9553	0.9456	0.9454	0.8372
P value	0.1789	0.7495	0.6889	0.6874	0.1873
Passed normality test (alpha=0.05)?	Yes	Yes	Yes	Yes	Yes
P value summary	ns	ns	ns	ns	ns
D
proB
Column	CTR	HEL-Ig	LTbR-Ig
Shapiro-Wilk test
W	0.8771	0.9471	0.9418
P value	0.1463	0.6588	0.6015
Passed normality test (alpha=0.05)?	Yes	Yes	Yes
P value summary	ns	ns	ns
preB
Column	CTR	HEL-Ig	LTbR-Ig
Shapiro-Wilk test
W	0.9203	0.9348	0.9027
P value	0.3948	0.5282	0.2681
Passed normality test (alpha=0.05)?	Yes	Yes	Yes
P value summary	ns	ns	ns
Imma B
Column	CTR	HEL-Ig	LTbR-Ig
Shapiro-Wilk test
W	0.9289	0.9264	0.929
P value	0.4713	0.4479	0.4718
Passed normality test (alpha=0.05)?	Yes	Yes	Yes
P value summary	ns	ns	ns
Mature B
Column	CTR	HEL-Ig	LTbR-Ig
Shapiro-Wilk test
W	0.8757	0.9474	0.9552
P value	0.1415	0.6615	0.7469
Passed normality test (alpha=0.05)?	Yes	Yes	Yes
P value summary	ns	ns	ns
E
Immature RBC
Column	CTR	HEL-Ig
Shapiro-Wilk test
W	0.955	0.9425
P value	0.7615	0.6357
Passed normality test (alpha=0.05)?	Yes	Yes
P value summary	ns	ns
Mature RBC
Column	CTR	HEL-Ig
Shapiro-Wilk test
W	0.8087	0.9665
P value	0.0354	0.8695
Passed normality test (alpha=0.05)?	No	Yes
P value summary	*	ns
Mann Whitney test
P value	0.0002
Exact or approximate P value?	Exact
P value summary	***
Significantly different (P < 0.05)?	Yes
One- or two-tailed P value?	Two-tailed
Sum of ranks in column A,B	100 , 36
Mann-Whitney U	0
F
Column	CTR	HEL-Ig	LTbR-Ig
Shapiro-Wilk test
W	0.9576	0.9228	0.962
P value	0.7725	0.4158	0.8188
Passed normality test (alpha=0.05)?	Yes	Yes	Yes
P value summary	ns	ns	ns
G
Column	CTR	HEL-Ig	LTbR-Ig
Shapiro-Wilk test
W	0.9395	0.8656	0.9393
P value	0.5769	0.1102	0.5749
Passed normality test (alpha=0.05)?	Yes	Yes	Yes
P value summary	ns	ns	ns
H
Column	HEL-Ig	LTbR-Ig
Shapiro-Wilk test
W	0.8961	0.9902
P value	0.2303	0.9963
Passed normality test (alpha=0.05)?	Yes	Yes
P value summary	ns	ns

## Sheet: Fig4
B
Column	WT	ALL WT	ALL LTbR∆
Shapiro-Wilk test
W	0.8794	0.8867	0.9014
P value	0.224	0.218	0.2604
Passed normality test (alpha=0.05)?	Yes	Yes	Yes
P value summary	ns	ns	ns
C
Column	WT	ALL WT	ALL LTbR∆
Shapiro-Wilk test
W	0.8847	0.9778	0.9166
P value	0.3589	0.9225	0.4815
Passed normality test (alpha=0.05)?	Yes	Yes	Yes
P value summary	ns	ns	ns
D
Column	WT	ALL WT	ALL LTbR∆
Shapiro-Wilk test
W	0.9621	0.9423	0.9406
P value	0.7923	0.6826	0.6639
Passed normality test (alpha=0.05)?	Yes	Yes	Yes
P value summary	ns	ns	ns
E
Column	WT	ALL WT	ALL LTbR∆
Shapiro-Wilk test
W	0.9626	0.9013	0.9638
P value	0.7953	0.417	0.8485
Passed normality test (alpha=0.05)?	Yes	Yes	Yes
P value summary	ns	ns	ns
F
Column	ALL WT	ALL LTbR∆
Shapiro-Wilk test
W	0.8963	0.9244
P value	0.3898	0.5375
Passed normality test (alpha=0.05)?	Yes	Yes
P value summary	ns	ns
H
Column	WT	ALL WT	ALL LTbR∆
Shapiro-Wilk test
W	0.9626	0.9013	0.9638
P value	0.7953	0.417	0.8485
Passed normality test (alpha=0.05)?	Yes	Yes	Yes
P value summary	ns	ns	ns
I
Column	WT	ALL WT	ALL LTbR∆
Shapiro-Wilk test
W	0.9428	0.9156	0.9344
P value	0.6712	0.5021	0.6144
Passed normality test (alpha=0.05)?	Yes	Yes	Yes
P value summary	ns	ns	ns
J
Column	WT	ALL WT	ALL LTbR∆
Shapiro-Wilk test
W	0.9395	0.9083	0.8884
P value	0.6512	0.4577	0.3097
Passed normality test (alpha=0.05)?	Yes	Yes	Yes
P value summary	ns	ns	ns
K
Column	ALL WT	ALL LTbR∆
Shapiro-Wilk test
W	0.9246	0.9171
P value	0.5598	0.4849
Passed normality test (alpha=0.05)?	Yes	Yes
P value summary	ns	ns
N
Column	CTR	Ltb+/+	Ltb-/-
Shapiro-Wilk test
W	0.9653	0.8512	0.9225
P value	0.8626	0.098	0.4892
Passed normality test (alpha=0.05)?	Yes	Yes	Yes
P value summary	ns	ns	ns
O
proB
Column	CTR	Ltb+/+	Ltb-/-
Shapiro-Wilk test
W	0.9289	0.8676	0.9049
P value	0.5064	0.1427	0.3618
Passed normality test (alpha=0.05)?	Yes	Yes	Yes
P value summary	ns	ns	ns
preB
Column	CTR	Ltb+/+	Ltb-/-
Shapiro-Wilk test
W	0.8341	0.8921	0.815
P value	0.0655	0.2448	0.0574
Passed normality test (alpha=0.05)?	Yes	Yes	Yes
P value summary	ns	ns	ns
Imma B
Column	CTR	Ltb+/+	Ltb-/-
Shapiro-Wilk test
W	0.8675	0.8758	0.8106
P value	0.1424	0.1715	0.052
Passed normality test (alpha=0.05)?	Yes	Yes	Yes
P value summary	ns	ns	ns
P
Column	Ltb+/+	Ltb-/-
Shapiro-Wilk test
W	0.8949	0.93
P value	0.2597	0.5505
Passed normality test (alpha=0.05)?	Yes	Yes
P value summary	ns	ns
R
Column	Ltb+/+	Ltb-/-	3XLtb-/-
Shapiro-Wilk test
W	0.8381	0.93	0.8849
P value	0.1597	0.5505	0.332
Passed normality test (alpha=0.05)?	Yes	Yes	Yes
P value summary	ns	ns	ns
S
Column	CTR	Ltb+/+	Ltb-/-	3XLtb-/-
Shapiro-Wilk test
W	0.9653	0.9332	0.9225	0.8559
P value	0.8626	0.6183	0.4892	0.2139
Passed normality test (alpha=0.05)?	Yes	Yes	Yes	Yes
P value summary	ns	ns	ns	ns

## Sheet: Fig5
A
Column	0	100	200	300	500
Shapiro-Wilk test
W	0.9723	0.7173	0.8726	0.8841	0.8652
P value	0.8556	0.0181	0.3079	0.3564	0.2793
Passed normality test (alpha=0.05)?	Yes	No	Yes	Yes	Yes
P value summary	ns	*	ns	ns	ns
100
vs.
0
Mann Whitney test
P value	0.0571
Exact or approximate P value?	Exact
P value summary	ns
Significantly different (P < 0.05)?	No
One- or two-tailed P value?	Two-tailed
Sum of ranks in column A,B	11 , 25
Mann-Whitney U	1
C
Column	ALL PBS	ALL AMD3100	preB PBS	preB AMD3100
Shapiro-Wilk test
W	0.8139	0.8735	0.7478	0.8107
P value	0.1296	0.2809	0.0368	0.0988
Passed normality test (alpha=0.05)?	Yes	Yes	No	Yes
P value summary	ns	ns	*	ns
Column D
vs.
Column C
Mann Whitney test
P value	0.0079
Exact or approximate P value?	Exact
P value summary	**
Significantly different (P < 0.05)?	Yes
One- or two-tailed P value?	Two-tailed
Sum of ranks in column D,E	30 , 15
Mann-Whitney U	0
D
Column	ALL PBS	ALL AMD3100	preB PBS	preB AMD3100
Shapiro-Wilk test
W	0.8202	0.9615	0.9595	0.8961
P value	0.1437	0.8185	0.7755	0.3887
Passed normality test (alpha=0.05)?	Yes	Yes	Yes	Yes
P value summary	ns	ns	ns	ns
G
proB
Column	CTR	ALL PBS	ALL CXCR4 ant.
Shapiro-Wilk test
W	0.8448	0.8753	0.9717
P value	0.2097	0.3188	0.9035
Passed normality test (alpha=0.05)?	Yes	Yes	Yes
P value summary	ns	ns	ns
preB
Column	CTR	ALL PBS	ALL CXCR4 ant.
Shapiro-Wilk test
W	0.9669	0.877	0.8829
P value	0.8223	0.3258	0.2828
Passed normality test (alpha=0.05)?	Yes	Yes	Yes
P value summary	ns	ns	ns
Imma B
Column	CTR	ALL PBS	ALL CXCR4 ant.
Shapiro-Wilk test
W	0.9748	0.9204	0.8525
P value	0.8711	0.5392	0.1648
Passed normality test (alpha=0.05)?	Yes	Yes	Yes
P value summary	ns	ns	ns
Mature B
Column	CTR	ALL PBS	ALL CXCR4 ant.
Shapiro-Wilk test
W	0.8596	0.917	0.9153
P value	0.2587	0.5205	0.4723
Passed normality test (alpha=0.05)?	Yes	Yes	Yes
P value summary	ns	ns	ns
H
BM
Column	ALL PBS	ALL CXCR4 ant.
Shapiro-Wilk test
W	0.9967	0.9443
P value	0.9886	0.6941
Passed normality test (alpha=0.05)?	Yes	Yes
P value summary	ns	ns
SP
Column	ALL PBS	ALL CXCR4 ant.
Shapiro-Wilk test
W	0.9594	0.935
P value	0.7754	0.6195
Passed normality test (alpha=0.05)?	Yes	Yes
P value summary	ns	ns
Blood
Column	ALL PBS	ALL CXCR4 ant.
Shapiro-Wilk test
W	0.8626	0.9221
P value	0.2695	0.5205
Passed normality test (alpha=0.05)?	Yes	Yes
P value summary	ns	ns
J
Column	preB	Imma B	Mature B	ALL
Shapiro-Wilk test
W	0.9595	0.9705	0.7419	0.8202
P value	0.7755	0.8446	0.0323	0.1437
Passed normality test (alpha=0.05)?	Yes	Yes	No	Yes
P value summary	ns	ns	*	ns
K
	preB	Imma B	Mature B	ALL
Shapiro-Wilk test
W	0.7128	0.9001	0.9716	0.9682
P value	0.0162	0.4318	0.8512	0.83
Passed normality test (alpha=0.05)?	No	Yes	Yes	Yes
P value summary	*	ns	ns	ns

## Sheet: Fig6
B
Column	CTR	HEL-Ig	LTbR-Ig
Shapiro-Wilk test
W	0.7323	0.953	0.9653
P value	0.026	0.7349	0.812
Passed normality test (alpha=0.05)?	No	Yes	Yes
P value summary	*	ns	ns
HEL-Ig
vs.
CTR
Mann Whitney test
P value	0.0286
Exact or approximate P value?	Exact
P value summary	*
Significantly different (P < 0.05)?	Yes
One- or two-tailed P value?	Two-tailed
Sum of ranks in column A,B	26 , 10
Mann-Whitney U	0
C
proB
Column	CTR	HEL-Ig	LTbR-Ig
Shapiro-Wilk test
W	0.9893	0.8921	0.7196
P value	0.9773	0.3679	0.0152
Passed normality test (alpha=0.05)?	Yes	Yes	No
P value summary	ns	ns	*
LTbR-Ig
vs.
HEL-Ig
Mann Whitney test
P value	0.0286
Exact or approximate P value?	Exact
P value summary	*
Significantly different (P < 0.05)?	Yes
One- or two-tailed P value?	Two-tailed
Sum of ranks in column B,C	10 , 26
Mann-Whitney U	0
preB
Column	CTR	HEL-Ig	LTbR-Ig
Shapiro-Wilk test
W	0.8803	0.8767	0.9795
P value	0.3108	0.2947	0.9321
Passed normality test (alpha=0.05)?	Yes	Yes	Yes
P value summary	ns	ns	ns
Imma B
Column	CTR	HEL-Ig	LTbR-Ig
Shapiro-Wilk test
W	0.9664	0.9379	0.8561
P value	0.8518	0.6509	0.2146
Passed normality test (alpha=0.05)?	Yes	Yes	Yes
P value summary	ns	ns	ns
Mature B
Column	CTR	HEL-Ig	LTbR-Ig
Shapiro-Wilk test
W	0.9025	0.8951	0.9395
P value	0.4236	0.3836	0.6625
Passed normality test (alpha=0.05)?	Yes	Yes	Yes
P value summary	ns	ns	ns
D
Column	CTR	HEL-Ig	LTbR-Ig
Shapiro-Wilk test
W	0.8916	0.9999	0.8791
P value	0.3653	>0.9999	0.3051
Passed normality test (alpha=0.05)?	Yes	Yes	Yes
P value summary	ns	ns	ns
E
Column	HEL-Ig	LTbR-Ig
Shapiro-Wilk test
W	0.943	0.8409
P value	0.687	0.1673
Passed normality test (alpha=0.05)?	Yes	Yes
P value summary	ns	ns

## Sheet: Sup Fig2
A
Column	CTR	ALL HEL-Ig	ALL LTbR-Ig
Shapiro-Wilk test
W	0.8768	0.8214	0.9274
P value	0.2547	0.0908	0.5288
Passed normality test (alpha=0.05)?	Yes	Yes	Yes
P value summary	ns	ns	ns
B
proB
Column	CTR	ALL HEL-Ig	ALL LTbR-Ig
Shapiro-Wilk test
W	0.923	0.9453	0.9921
P value	0.527	0.7024	0.9965
Passed normality test (alpha=0.05)?	Yes	Yes	Yes
P value summary	ns	ns	ns
preB
Column	CTR	ALL HEL-Ig	ALL LTbR-Ig
Shapiro-Wilk test
W	0.9029	0.9251	0.9751
P value	0.3915	0.5429	0.9324
Passed normality test (alpha=0.05)?	Yes	Yes	Yes
P value summary	ns	ns	ns
Imma B
Column	CTR	ALL HEL-Ig	ALL LTbR-Ig
Shapiro-Wilk test
W	0.9747	0.8833	0.9836
P value	0.9221	0.2847	0.9753
Passed normality test (alpha=0.05)?	Yes	Yes	Yes
P value summary	ns	ns	ns
Mature B
Column	CTR	ALL HEL-Ig	ALL LTbR-Ig
Shapiro-Wilk test
W	0.9177	0.8898	0.9721
P value	0.4891	0.3169	0.9133
Passed normality test (alpha=0.05)?	Yes	Yes	Yes
P value summary	ns	ns	ns
C
Neutrophils
Column	CTR	ALL HEL-Ig
Shapiro-Wilk test
W	0.9706	0.9514
P value	0.8965	0.752
Passed normality test (alpha=0.05)?	Yes	Yes
P value summary	ns	ns
Monocytes
Column	CTR	ALL HEL-Ig
Shapiro-Wilk test
W	0.9717	0.9496
P value	0.9034	0.7367
Passed normality test (alpha=0.05)?	Yes	Yes
P value summary	ns	ns
D
Column	ALL HEL-Ig	ALL LTbR-Ig
Shapiro-Wilk test
W	0.9473	0.9657
P value	0.7184	0.8662
Passed normality test (alpha=0.05)?	Yes	Yes
P value summary	ns	ns
E
Column	CTR	ALL PBS
Shapiro-Wilk test
W	0.9998	0.8858
P value	0.9994	0.3639
Passed normality test (alpha=0.05)?	Yes	Yes
P value summary	ns	ns
H
proB
Column	CTR	ALL PBS
Shapiro-Wilk test
W	0.9421	0.9723
P value	0.6672	0.856
Passed normality test (alpha=0.05)?	Yes	Yes
P value summary	ns	ns
preB
Column	CTR	ALL PBS
Shapiro-Wilk test
W	0.9747	0.8065
P value	0.8702	0.1144
Passed normality test (alpha=0.05)?	Yes	Yes
P value summary	ns	ns
Imma B
Column	CTR	ALL PBS
Shapiro-Wilk test
W	0.8988	0.8024
P value	0.4253	0.1065
Passed normality test (alpha=0.05)?	Yes	Yes
P value summary	ns	ns
Mature B
Column	CTR	ALL PBS
Shapiro-Wilk test
W	0.9758	0.9381
P value	0.8772	0.643
Passed normality test (alpha=0.05)?	Yes	Yes
P value summary	ns	ns
H
Column	CTR	ALL PBS
Shapiro-Wilk test
W	0.9702	0.9412
P value	0.8425	0.6617
Passed normality test (alpha=0.05)?	Yes	Yes
P value summary	ns	ns
I
Column	ALL PBS	ALL aIFNaR
Shapiro-Wilk test
W	0.9163	0.8644
P value	0.5162	0.2765
Passed normality test (alpha=0.05)?	Yes	Yes
P value summary	ns	ns

## Sheet: Sup Fig3
B
proB
Column	CTR	ALL	ALL IL7/M25
Shapiro-Wilk test
W	0.8461	0.8484	0.9016
P value	0.2137	0.2211	0.4391
Passed normality test (alpha=0.05)?	Yes	Yes	Yes
P value summary	ns	ns	ns
preB
Column	CTR	ALL	ALL IL7/M25
Shapiro-Wilk test
W	0.9338	0.9321	0.9732
P value	0.6166	0.6067	0.8612
Passed normality test (alpha=0.05)?	Yes	Yes	Yes
P value summary	ns	ns	ns
Imma B
Column	CTR	ALL	ALL IL7/M25
Shapiro-Wilk test
W	0.9994	0.9957	0.8665
P value	0.9982	0.9845	0.284
Passed normality test (alpha=0.05)?	Yes	Yes	Yes
P value summary	ns	ns	ns
Mature B
Column	CTR	ALL	ALL IL7/M25
Shapiro-Wilk test
W	0.9	0.8707	0.848
P value	0.4313	0.3004	0.2199
Passed normality test (alpha=0.05)?	Yes	Yes	Yes
P value summary	ns	ns	ns
C
BM
Column	ALL IL7/M25	ALL IL7/M25
Shapiro-Wilk test
W	0.9681	0.9058
P value	0.8298	0.4606
Passed normality test (alpha=0.05)?	Yes	Yes
P value summary	ns	ns
SP
Column	ALL IL7/M25	ALL IL7/M25
Shapiro-Wilk test
W	0.6527	0.8639
P value	0.0028	0.2745
Passed normality test (alpha=0.05)?	No	Yes
P value summary	**	ns
Mann Whitney test
P value	0.0286
Exact or approximate P value?	Exact
P value summary	*
Significantly different (P < 0.05)?	Yes
One- or two-tailed P value?	Two-tailed
Sum of ranks in column A,B	26 , 10
Mann-Whitney U	0
Blood
Column	ALL IL7/M25	ALL IL7/M25
Shapiro-Wilk test
W	0.9363	0.8813
P value	0.6321	0.3441
Passed normality test (alpha=0.05)?	Yes	Yes
P value summary	ns	ns

## Sheet: Sup Fig4
B
Column	WT	LTbR∆
Shapiro-Wilk test
W	0.9172	0.8778
P value	0.5211	0.3291
Passed normality test (alpha=0.05)?	Yes	Yes
P value summary	ns	ns
H		ETP 0.01µM					ETP 0.5µM
Column	CTR	0	125	250	500	1000	0	250	500	1000	2000	IMD3504 nM
Shapiro-Wilk test
W	0.696	0.9496	0.7945	0.8165	0.7454	0.7806	0.9564	0.8751	0.9376	0.8362	0.7956
P value	0.0104	0.7139	0.0927	0.1352	0.035	0.0717	0.7562	0.318	0.6399	0.1846	0.0945
Passed normality test (alpha=0.05)?	No	Yes	Yes	Yes	No	Yes	Yes	Yes	Yes	Yes	Yes
P value summary	*	ns	ns	ns	*	ns	ns	ns	ns	ns	ns
ETP 0.01µM
vs.
CTR
Mann Whitney test
P value	0.0286
Exact or approximate P value?	Exact
P value summary	*
Significantly different (P < 0.05)?	Yes
One- or two-tailed P value?	Two-tailed
Sum of ranks in column A,B	10 , 26
Mann-Whitney U	0
