# Supplementary figures and images for: Cell circuits between leukemic cells and mesenchymal stem cells block lymphopoiesis by activating lymphotoxin beta receptor signaling
Source: eLife journal article supplement (doi:10.7554/elife.83533), 2023-03-13

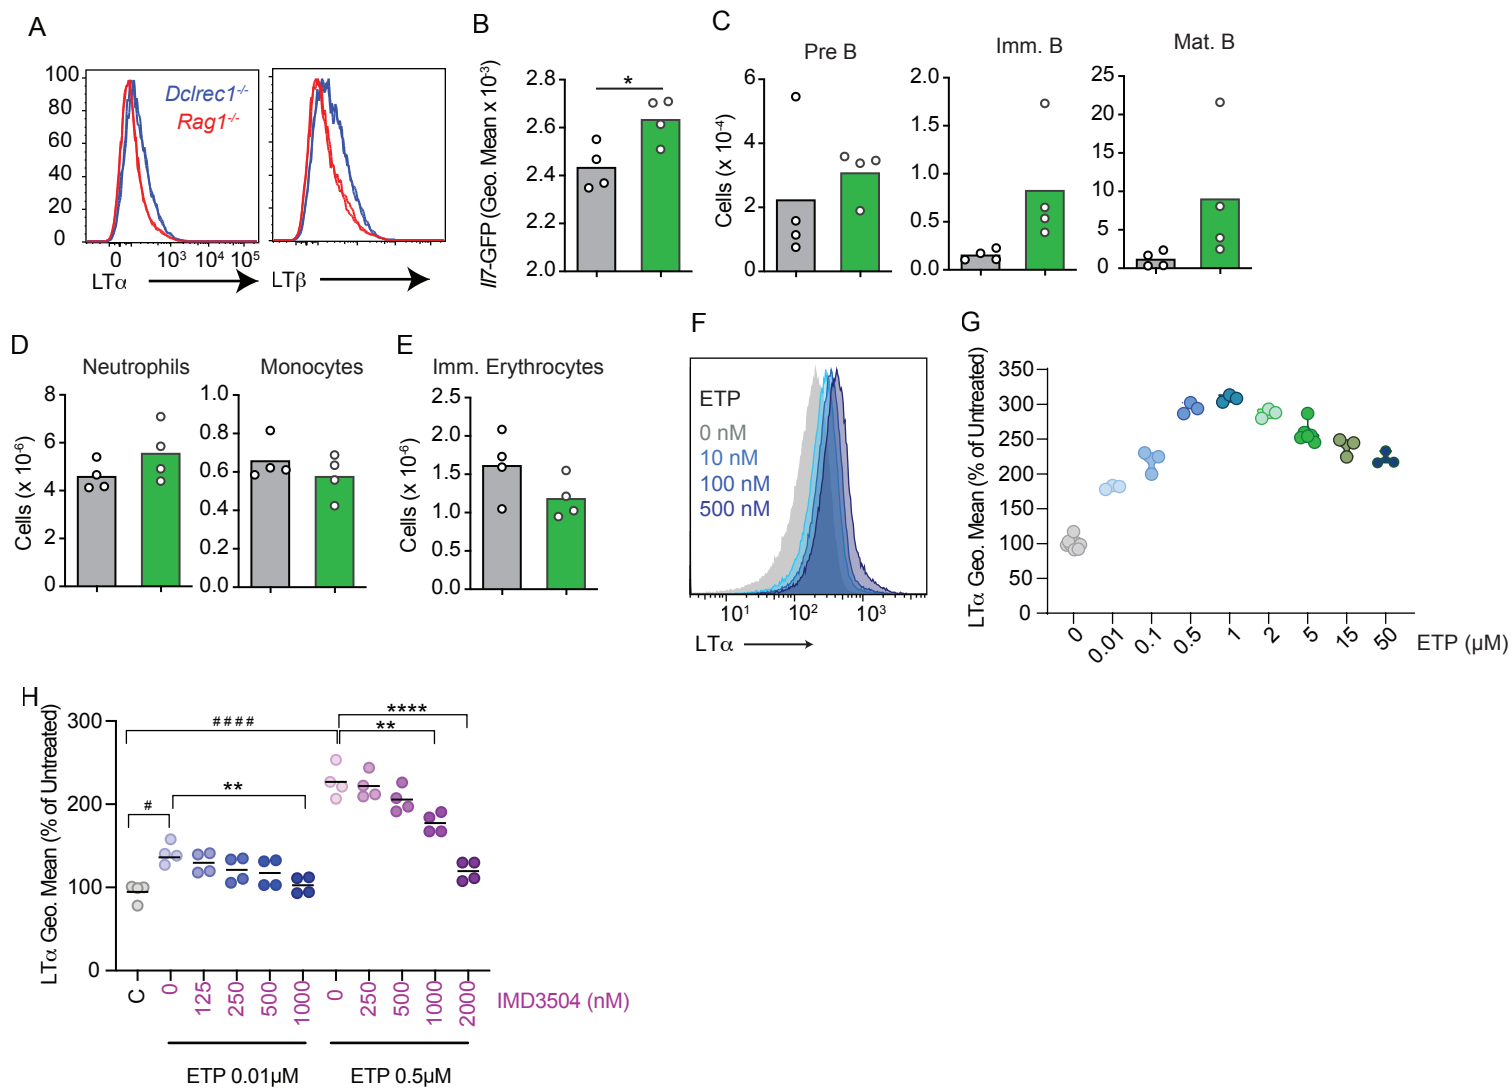

Supplement: supp [file elife-83533-supp-v1.zip]

**A** B-ALL COG P9906 childhood n=207

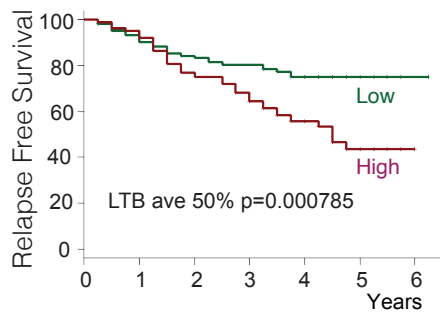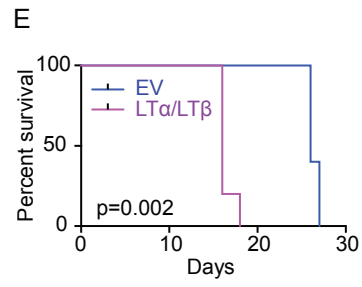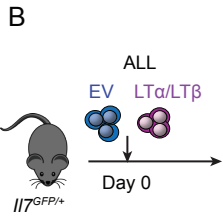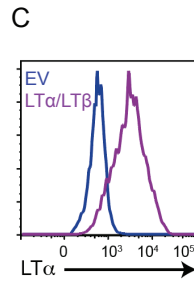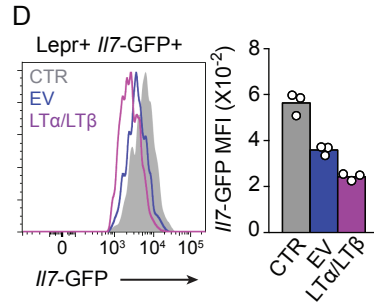

Supplement: supp [file elife-83533-supp-v1.zip]

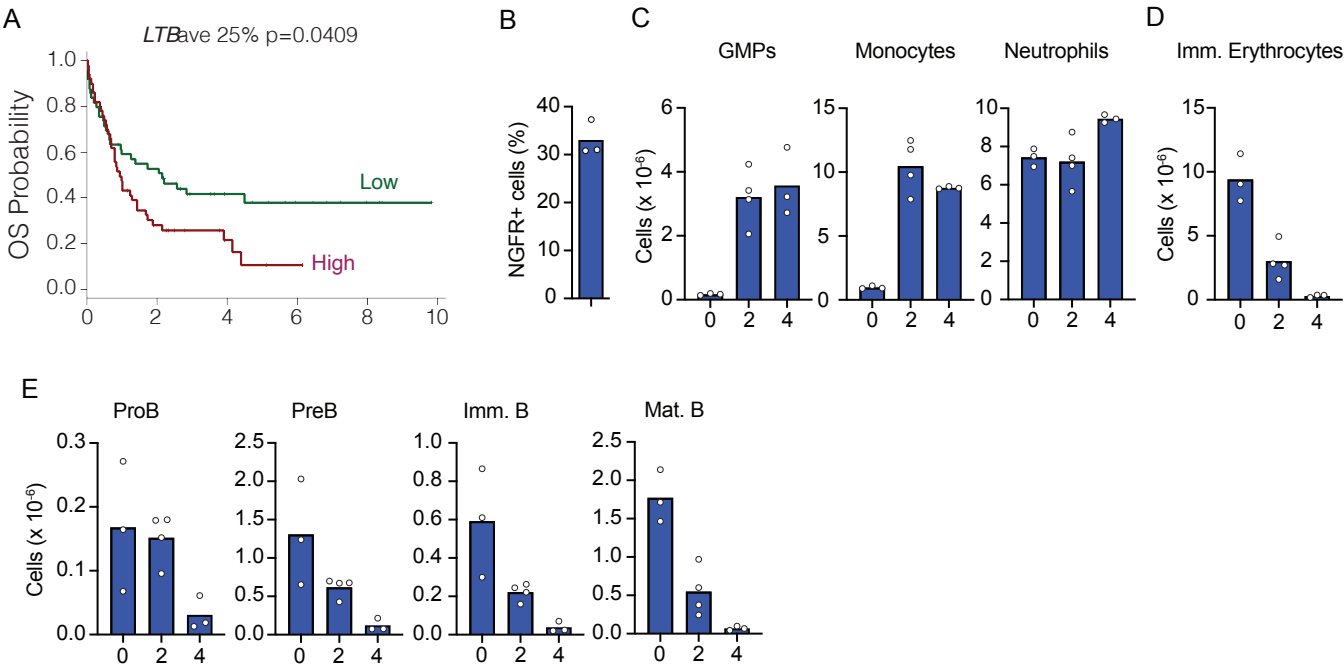

Supplement: supp [file elife-83533-supp-v1.zip]

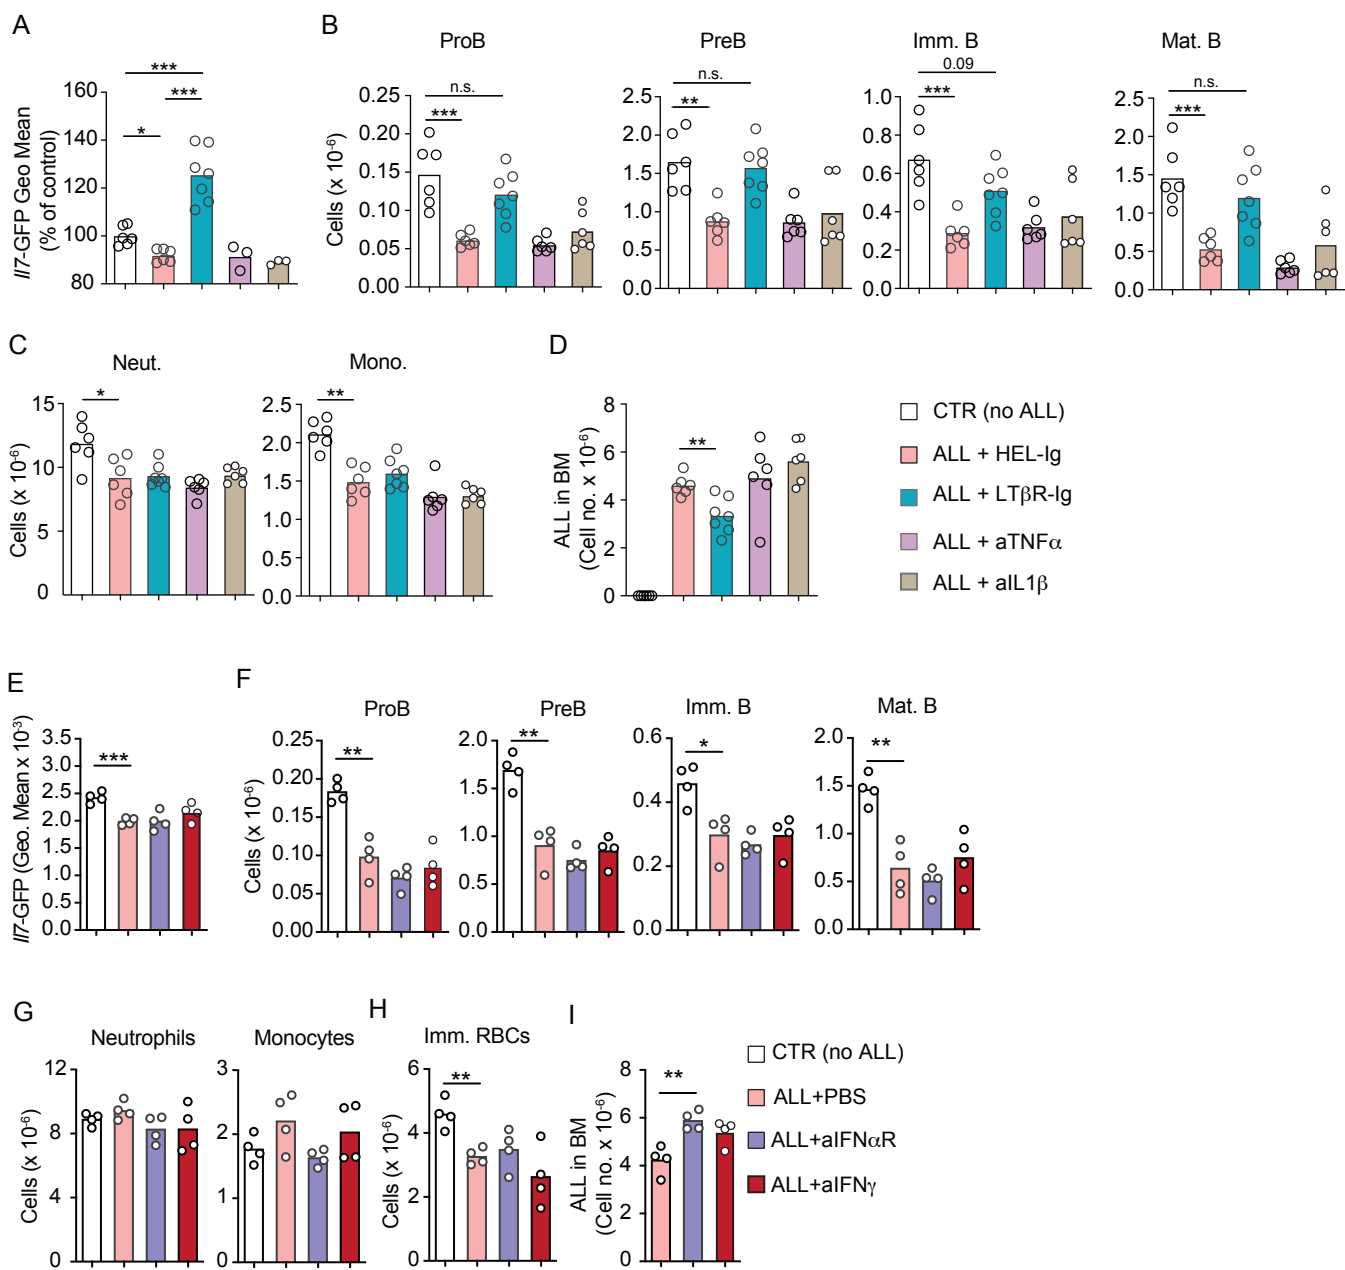

Supplement: supp [file elife-83533-supp-v1.zip]

A

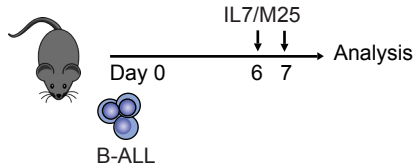

B

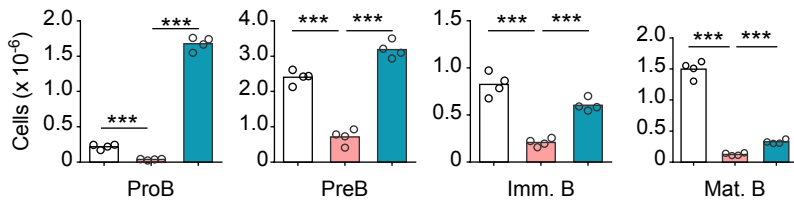

C

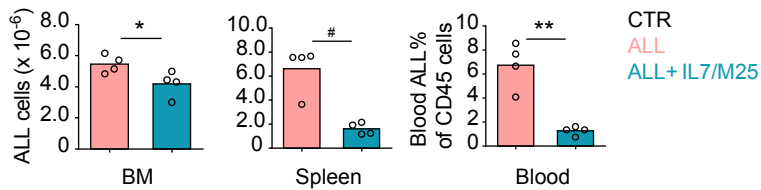

Supplement: supp [file elife-83533-supp-v1.zip]

A

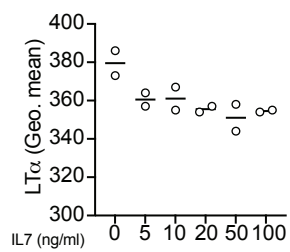

B

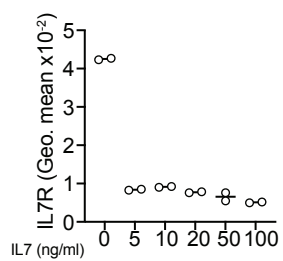

Supplement: supp [file elife-83533-supp-v1.zip]
